# Supplementary material for: The habu genome reveals accelerated evolution of venom protein genes
Source: PubMed Central journal article supplement (PMC6062510; doi:10.1038/s41598-018-28749-4), 2018-07-26

1 **SUPPLEMENTARY INFORMATION**

2

3 **The habu genome reveals accelerated evolution of venom protein**  
4 **genes.**

5

6 **Hiroki Shibata<sup>a, b, 1</sup>, Takahito Chijiwa<sup>c</sup>, Naoko Oda-Ueda<sup>d</sup>, Hitomi Nakamura<sup>d</sup>,**

7 **Kazuaki Yamaguchi<sup>c</sup>, Shousaku Hattori<sup>e</sup>, Kazumi Matsubara<sup>f</sup>, Yoichi Matsuda<sup>g</sup>,**

8 **Akifumi Yamashita<sup>h</sup>, Akiko Isomoto<sup>a, b</sup>, Kazuki Mori<sup>b, i</sup>, Kosuke Tashiro<sup>b</sup>, Satoru**

9 **Kuhara<sup>b</sup>, Shinichi Yamasaki<sup>j</sup>, Manabu Fujie<sup>j</sup>, Hiroki Goto<sup>j</sup>, Ryo Koyanagi<sup>j</sup>,**

10 **Takeshi Takeuchi<sup>k</sup>, Yasuyuki Fukumaki<sup>a</sup>, Motonori Ohno<sup>c</sup>, Eiichi Shoguchi<sup>k</sup>,**

11 **Kanako Hisata<sup>k</sup>, Noriyuki Satoh<sup>k, 1</sup> and Tomohisa Ogawa<sup>h, 1</sup>**

12

13 <sup>a</sup>Division of Genomics, Medical Institute of Bioregulation, Kyushu University, Fukuoka

14 812-8582, Japan

15 <sup>b</sup>Graduate School of Systems Life Sciences, Department of Bioscience and

16 Biotechnology, Kyushu University, Fukuoka 812-8581, Japan

17 <sup>c</sup>Department of Applied Life Science, Faculty of Bioscience and Biotechnology, Sojo

18 University, Kumamoto 860-0082, Japan

19 <sup>d</sup>Department of Biochemistry, Faculty of Pharmaceutical Sciences, Sojo University,

20 Kumamoto 860-0082, Japan

21 <sup>e</sup>Institute of Medical Science, University of Tokyo, Oshima-gun, Kagoshima 894-1531,

22 Japan

23 <sup>f</sup>Department of Information and Biological Sciences, Graduate School of Natural

24 Sciences, Nagoya City University, Nagoya, Aichi 467-0802, Japan

25 <sup>g</sup>Department of Applied Molecular Biosciences, Graduate School of Bioagricultural

26 Sciences, Nagoya University, Nagoya, Aichi 464-8601, Japan

27 <sup>h</sup>Department of Biomolecular Science, Graduate School of Life Sciences, Tohoku

28 University, Sendai, Miyagi 980-8577, Japan

29 <sup>i</sup>Computational Bio-Big Data Open Innovation Laboratory, National Institute of

30 Advanced Industrial Science and Technology, Shinjuku-ku, Tokyo 169-0072, Japan.

31 <sup>l</sup>DNA Sequencing Section, Okinawa Institute of Science and Technology Graduate

32 University, Onna, Okinawa 904-0495, Japan

33 <sup>k</sup>Marine Genomics Unit, Okinawa Institute of Science and Technology Graduate

34 University, Onna, Okinawa 904-0495, Japan

35

36 <sup>l</sup>Correspondence and requests for materials should be addressed to H.S. (email:

37 hshibata@gen.kyushu-u.ac.jp), N.S. (e-mail: norisky@oist.jp), and T.O. (email:

38 tomohisa.ogawa.c3@tohoku.ac.jp)

39

40

## 41 **Characterization of the habu venom genes**

42 Followings are descriptions of each of the 18 families.

43

### 44 (a) Metalloproteinases (MP)

45 Metalloproteinases (MPs) are one of the major constituents of snake venoms and key  
46 toxins involved in venom-induced pathogenesis such as hemorrhage, fibrinolysis and  
47 apoptosis. Snake venom MPs (svMPs) are classified into four groups (P-I to P-IV)  
48 according to their domain architecture and size: P-I MPs possess a metalloproteinase  
49 domain only and are largely hemorrhagic; P-II contain metalloproteinase and disintegrin  
50 domains and are larger; P-III have metalloproteinase, disintegrin, and cysteine-rich  
51 domains; and P-IV have lectin-like domain(s) linked by disulfide bonds to a P-III  
52 structure<sup>1</sup>. The structural complexity of P-III MPs yields a great diversity of their  
53 functions. P-II, P-III, and P-IV groups belong to the ‘disintegrin and metalloproteinase’  
54 (ADAM) family.

55 A thorough examination of *P. flavoviridis* gene models and transcriptomes identified at  
56 least 11 *svMP* genes (*svMP01* to *svMP11*) (Supplementary Fig. S3a; Table 1) and 55  
57 transcripts that are expressed in the venom gland (Supplementary Fig. S3a; Table 1).  
58 *svMP01*, *svMP02*, *svMP03* and *svMP11* (Gene model ID: habu1\_s2862\_g10314a/b/c/d)  
59 were located tandem on the same scaffold (habu1\_scaffold\_2862, Acc no.  
60 BFFQ01002098) (Supplementary Fig. S8a). They encoded a vascular  
61 apoptosis-inducing protein HV1, flavorase, a VMP III-like protease, and NaMP-like  
62 protease, respectively (Supplementary Fig. S3a). Three genes, *svMP06* (Gene model ID:

63 habu1\_s14911\_g21429), *svMP07* (g21430), and *svMP08* (g21431), which encode H2  
64 metalloproteinase, HR2a, and flavoridin, respectively, were also located on the same  
65 scaffold, habu1\_scaffold\_14911 (Acc no. BFFQ01007560) (Supplementary Fig. S3a;  
66 Supplementary Fig. S8a). Since the two scaffolds form a super-scaffold, it is highly  
67 likely that *svMPs* (*svMP01-03*, *11* and *svMP06-08*) are located tandem in close  
68 proximity to each other (Supplementary Fig. S8a). In addition, *svMP04* genes (Gene  
69 model ID: habu1\_s3258\_g11210) and *svMP05* (g11211) encoded a jerdonitin-like  
70 protease, the major hemorrhage factor, HR1a, and a jerdonitin-like protease,  
71 respectively, and they were all located on habu1\_scaffold\_3258 (Acc no.  
72 BFFQ01002364) (Supplementary Fig. S3a). *svMP09* and *svMP10* (Gene model ID:  
73 habu1\_s399953\_g24864a/b) encoded HR1b and Mt-b/elegantin-like protease,  
74 respectively, and were located on habu1\_scaffold\_399953 (Acc no. BFFQ01081176)  
75 (Supplementary Fig. S3a). Numbers of exons have also become highly variable in this  
76 gene family, ranging from 13 to 17, of which exon 11 contains a catalytic zinc binding  
77 motif, HEXGHNLGXXHD (Supplementary Fig. S10).

78

79 Furthermore, among non-venom (nv) MPs, we identified 17 paralogous genes (*nvMP01*  
80 to *nvMP17*) of *ADAM* (a disintegrin and metalloproteinase) and 26 paralogous genes  
81 (*nvMP18* to *nvMP43*) of *ADAMTS* (ADAM with thrombospondin motifs) and 11  
82 paralogous genes (*nvMP44* to *nvMP54*) of *MMP* (matrix metalloproteinase)  
83 (Supplementary Fig. S3b). ADAM and ADAMTS include trans-membrane and secreted  
84 proteins with functions in cell adhesion and proteolytic processing of the ectodomain of

85 cell-surface receptors and signaling proteins as key contributing molecules to various  
86 physiological functions including cell adhesion, fertilization, migration, proteolysis and  
87 signaling<sup>2-5</sup> in addition to other MPs such as MMP (*nvMP44* to *nvMP54*). Predicted  
88 genes encoding *nvADAMs* and *nvADAMTS* were located on different scaffolds than  
89 *svMPs*, except for *nvMP57* located on *habu1\_s2862*, which contains *svMP01*, *svMP02*,  
90 *svMP03* and *svMP11* (Supplementary Fig. 3b, Supplementary Fig. 8a).

91 Phylogenetic analysis shows that habu SV and NV metalloproteinase genes are  
92 distinctly clustered into SV and NV homologs such as ADAM, ADAMTS, and MMP  
93 from different venomous snakes and other reptile except for ADAMTS9  
94 (Supplementary Figs. S3c, S3d and S3e). Phylogenetic tree of MP also shows that  
95 *svMPs* has been derived from the ancestor of ADAM clade including ADAM8, 9, 12,  
96 15, 19, 21, 32, and 33 (Supplementary Fig. S3c). Moreover, it was found that the  
97 apparent clade including NaMP-like *svMP* (*svMP11*) has initially diverged from a  
98 common ancestor of *P. flavoviridis* *svMPs* (Supplementary Fig. S3d).

99

#### 100 (b) Serine proteases (SP)

101 Serine proteases (SPs) are also major constituents of venom proteins. They act on  
102 various macromolecular substrates of blood coagulation, fibrinolytic, and  
103 kallikrein-kinin systems, and on platelets to cause hemostatic defects<sup>6</sup>. Although *svSPs*  
104 belong to the chymotrypsin subfamily (peptidase subfamily S1A), they show distinct  
105 substrate specificities toward macromolecules, compared the relatively non-specific  
106 activity of trypsin or chymotrypsin.

107 The *P. flavoviridis* genome contains at least 11 *svSP* genes (*svSP01* to *svSP11*)  
108 (Supplementary Figs. S4a and S11) with complete sequences. *svSP01* (*TLf1*) was the  
109 most abundant *svSP* transcript in the venom gland corresponds to an acidic protein,  
110 known as flavoxobin<sup>7,8</sup> and habutobin<sup>9</sup>. It encodes a weakly thrombin-like enzyme of  
111 242 amino acids that specifically releases fibrinopeptide A from fibrinogen<sup>7</sup>. Although  
112 no information is available with regard to possible kallikrein-like activity, it was shown  
113 that flavoxobin acts as a heterologous C3-convertase that selectively releases human  
114 C3b and C3a<sup>10</sup>. *svSP02* (*TLf2*) is also major *svSP* transcript that encodes a basic  
115 thrombin-like enzyme (pI >10) (Supplementary Fig. S4a).

116 More recently, we found that *TLf2* enhances the myonecrotic activity of Lys49-PLA2,  
117 although *TLf2* was hydrolytically inactive due to replacement of its catalytic residue  
118 His57 with Arg (Ogawa et al., in preparation). From the *P. flavoviridis* venom, a  
119 kinin-releasing enzyme, flavorase, and thrombin-like enzyme possessing fibrinopeptide  
120 A- and B-releasing activity, flavoviridiobin, have been reported<sup>11,12</sup>. However, since no  
121 sequence data are available, we could not identify them among transcripts and genome  
122 sequences of our analyses. From the sequence homologies of *P. flavoviridis* *svSPs* with  
123 other snake *svSPs* using phylogenetic tree analysis (Supplementary Fig. S4c), *svSP03*,  
124 *svSP04*, and *svSP05* correspond to beta fibrinogenase, catroxase-like kinin-releasing  
125 enzyme, and flavorase, respectively, which have kinin-releasing activity similar to  
126 KN-BJ from *Bothrops jararaca* venom<sup>13</sup>. Several of the genes were located tandem in  
127 the certain scaffolds, that is, *svSP06* (Gene ID: habu1\_s4106\_g13431a), *svSP07*  
128 (g13431b) and *svSP10* (g13432) were located on scaffold\_4106 (Acc no.

129 BFFQ01002946) (Supplementary Fig. S8b). *svSP04* (habu1\_s6789\_g17480), *svSP05*  
130 (g17481a), and *svSP08* (g17481b) were located on the scaffold\_4106 (Acc no.  
131 BFFQ01002946), while *svSP09* (habu1\_s7597\_g18190c), *svSP01* (g18190a), and  
132 *svSP03* (g18190b) were located on the scaffold 7597 (Acc no. BFFQ01004842)  
133 (Supplementary Fig. S8b).

134 Based on the similarity of enzymatic activities and the conservation of primary and  
135 tertiary structures of SPs, it is believed that svSPs evolved from an ancestral  
136 kallikrein-like SP. *svSP* genes consist of 6 exons except for *svSP06*, which contains  
137 additional two exons (exons 7 and 8) including 3' non-coding region (Supplementary  
138 Fig. S11). *svSP* possess the same exon-intron junctions as coding regions of mammalian  
139 *kallikrein (KLK)*<sup>14</sup> and trypsin gene rather than other SPs such as elastase  
140 (Supplementary Fig. S11b). In addition to sv-related *SP* genes, we found at least 34  
141 SP-family genes with non-venom related functions (Supplementary Fig. S4b).

142 Phylogenetic analysis shows that habu SV and NV serine proteinase genes are distinctly  
143 clustered with SV and NV homologs from different venomous snakes and other reptile.  
144 Furthermore, phylogenetic tree of SP also shows that svSPs derived from the  
145 trypsin-like SPs (Supplementary Fig. S4c).

146

147 (c) C-type lectin-like proteins (or snaclecs) / Galactose binding lectins (CTLP)

148 C-type lectins (CTLPs) are one of the major animal lectin families, members of which  
149 bind in Ca<sup>2+</sup>-dependent fashion to carbohydrates. In general, they adopt multidomain  
150 structures and contain one or more highly conserved carbohydrate recognition domain



151 (CRD) consisting of 115–130 amino acids with a unique  $\alpha/\beta$  topology. To date, the CTL  
152 domain superfamily has been classified into 17 groups<sup>15-18</sup> first discovered lectin  
153 activity (agglutinating activity of erythrocytes and leukocytes) in snake venoms, and the  
154 first isolation and characterization were reported by Gartner et al.<sup>19</sup>.

155 To date, primary structures of 15 kinds of snake venom galactose-binding lectins  
156 (svGBL) have been determined, and all svGBLs are C-type lectins<sup>20</sup>. Furthermore,  
157 C-type lectin-like proteins (CTLP) lacking carbohydrate-binding activity have been  
158 isolated from snake venom and characterized as heterodimers, which were dimerized by  
159 unique domain swapping between alpha and beta chains, resulting in a conformational  
160 change in the central loop with a new concave surface<sup>21,22</sup>. Dimeric svCTLPs showed  
161 several pharmacological activities such as anticoagulant, platelet aggregations  
162 (agonistic) and their inhibition (antagonistic) via specific binding to coagulant factors  
163 IX and X, von Willebrand factor, and integrins on the platelet such as GPIa/IIa, GPIb,  
164 GPVI.

165 The present study identified 10 genes encoding svCTLPs (Supplementary Fig. S5a) and  
166 39 genes for non-venomous (nv) CTLs (Supplementary Fig. S5b). Molecular phylogeny  
167 shows that the ten svCTLP genes are subdivided into three groups, lectin-type  
168 (*svCTLP08* and *svCTLP10*), B-chain type (*svCTLP05*, *06* and *07*), and A-chain type  
169 (*svCTLP01*, *02*, *03*, *04* and *09*) (Supplementary Fig. S5c). The genes encoding svCTLPs  
170 were composed of six exons with conserved exon-intron junctions except for *svCTLP08*,  
171 which lacks exons 1 - 3, resulting in four exons (Supplementary Fig. S5a). *svCTLP01*,  
172 *svCTLP02*, *svCTLP05* and *svCTLP09* encode factor XI/X binding protein alpha,

173 flavocetin A alpha, factor XI/X binding protein beta, and new factor XI/X binding  
174 protein alpha-like with 83% identity, respectively, although they were not assigned gene  
175 model ID numbers (Supplementary Fig. S5a). Interestingly, four genes, *svCTLP03*  
176 (Gene model ID: *habu1\_s10061\_g19810\_c*), *svCTLP04* (*g19810\_a*), *svCTLP06*  
177 (*g19809*), and *svCTLP07* (*g19810\_b*), which encode stejaggregin-A like alpha,  
178 rhodocetin/EmEMS 16-like alpha, flavocetin A beta, and rhodocetin/EmEMS 16-like  
179 beta, respectively, were located tandemly on *habu1\_scaffold\_10061* (Acc no.  
180 BFFQ01005768) (Supplementary Fig. S8c).

181 Non-venom CTL genes encoding C-type lectins, *nvCTLP01* (Gene model ID:  
182 *habu1\_s10061\_g19804*), *nvCTLP02* (*g19805*), *nvCTLP03* (*g19806*), *nvCTLP04*  
183 (*g19807*), and *nvCTLP05* (*g19808*) (Supplementary Fig. S5b), were located on the same  
184 scaffold, *habu1\_scaffold\_10061* (Acc no. BFFQ01005768) (Supplementary Fig. S8c).  
185 On the other hand, *svCTLP08* (Gene model ID: *habu1\_s3168\_g10977*) and *svCTLP10*  
186 (*g10975*), which encoded venom C-type lectins, were located on *habu1\_scaffold\_3168*  
187 (Acc no. BFFQ01002306). Non-venom CTL genes, *nvCTLP12* (Gene model ID:  
188 *habu1\_s3168\_g10976*), *nvCTLP13* (*g10978*), and *nvCTLP14*, and (*g10979*)  
189 (Supplementary Fig. S5b) were also located on *habu1\_scaffold\_3168* (Acc no.  
190 BFFQ01002306) (Supplementary Fig. S8c).

191

#### 192 (d) Phospholipases A<sub>2</sub> (PLA<sub>2</sub>)

193 Phospholipase A<sub>2</sub> (PLA<sub>2</sub>, EC 3.1.1.4) catalyzes hydrolysis of 2-acyl ester bonds of  
194 3-*sn*-phosphoglycerides in the presence of Ca<sup>2+</sup>, to liberate 3-*sn*-lysophosphoglycerides

195 and fatty acids<sup>23</sup>. Snake venoms PLA<sub>2</sub>s are major toxins and are classified into groups I  
196 and II based on disulfide bonds<sup>24</sup>. Group-I PLA<sub>2</sub>s are found in elapid venoms while  
197 group II are in viperid venoms. Group-II PLA<sub>2</sub>s are further divided into two subgroups,  
198 [Asp49] PLA<sub>2</sub> forms and [Lys49] PLA<sub>2</sub> forms<sup>25</sup>. It has been reported that they share the  
199 same scaffold<sup>26-28</sup>. Numerous studies have shown the presence of multiple PLA<sub>2</sub> genes  
200 in habu venoms<sup>29-34</sup>.

201 The *P. flavoviridis* genome contains ten types of group II venom PLA<sub>2</sub> genes  
202 (*svPLA201a, b* to *svPLA209*) (Supplementary Fig. 6a). In addition, we also confirmed  
203 that four PLA<sub>2</sub> transcripts, including a hemolytic [Asp49] PLA<sub>2</sub> (*svPLA201*) [Accession  
204 #: D10070.1, D10720.1, D10722.1, AB778558.1, AB072174.1, AB778559.1],  
205 edema-inducing basic [Asp49]PLA<sub>2</sub> (*svPLA202*), a weak neurotoxin PLA-N  
206 (*svPLA203*) [Accession #: AB848131], and [Lys49]PLA<sub>2</sub> myotoxins (*svPLA204* to  
207 *svPLA206*) (BPI, BPII and BPIII) [Accession #: D10718.1, D10719.1, AB470470.1],  
208 were expressed in the venom gland (Supplementary Fig. S6a).

209 In addition, the *P. flavoviridis* genome contains at least 31 genes encoding non-venom  
210 PLA<sub>2</sub>s (Supplementary Fig. S6b). These include type I PLA<sub>2</sub>s such as *nvPLA201* and  
211 *nvPLA202* (habu1\_s9792\_g19655 and habu1\_s9792\_g19656, respectively) and type II  
212 PLA<sub>2</sub>, *nvPLA203* (habu1\_s4562\_g14470) (Supplementary Fig. S6b). Molecular  
213 phylogeny of PLA<sub>2</sub> shows that *svPLA2* genes have been evolved from ancestral gene  
214 of GIIE gene, and then diversified into multiple gene types with several toxic activities  
215 such as myotoxic, hemolytic, edema-inducing and neurotoxic (Supplementary Fig.  
216 S6c).

217

218 (e) Three-finger toxin (3FTX)

219 Three-finger toxins (3FTXs) are non-enzymatic neurotoxins composed of about 60-70  
220 amino acid residues. They are major components in the venoms of elapids (cobras,  
221 kraits and mambas), hydrophiids (sea snakes) and colubrids, but extremely minor  
222 components in viperid snakes<sup>42,43</sup>. Although the gross structures of 3FTXs are  
223 conserved, they have diverse pharmacologies such as L-type calcium channel inhibition,  
224 acetylcholinesterase inhibition, and muscarinic and nicotinic acetylcholine receptor  
225 antagonism<sup>44,45</sup>. 3FTXs were considered specific to elapid venoms until they were  
226 shown to be present in *Sistrurus catenatus edwardsii* venom (0.83% abundance)<sup>37,46</sup> and  
227 a venom gland transcriptome of *P. flavoviridis*<sup>21</sup>.

228 We identified four genes encoding 3FTXs in the *P. flavoviridis* genome (*3FTX-01*,  
229 *3FTX-02*, *3FTX-03* and *3FTX-04*; Gene models *habu1\_s4579\_g14476*, *\_g14477*,  
230 *\_g14478*, *\_g14475*, respectively) (Supplementary Fig. S12a). These are located  
231 tandemly on the same scaffold, *habu1\_scaffold\_4579* (Acc no. BFFQ01003259). From  
232 RNA-seq data of *P. flavoviridis* tissues, these *3FTX* genes generate single transcripts,  
233 respectively (Supplementary Fig. S12a). *3FTX-01* and *3FTX-02* were expressed in  
234 venom gland. Three *3FTXs*, *3FTX-01*, *02* and *04*, have highly conserved Cys residues.  
235 Furthermore, two non-venom 3FTX genes, *3FTX-05* (*habu1\_s138\_g00722*) and  
236 *3FTX-06* (*habu1\_s138\_g00721*), encoding UPAR-Ly6 and CD59, respectively, were  
237 identified on the same scaffold, *habu1\_scaffold\_138* (Acc no. BFFQ01000122)  
238 (Supplementary Fig. S12a). Seven transcript variants were generated from *3FTX-05*,

239 although other *3FTX* genes generate single transcript. Molecular phylogeny shows that  
240 toxic 3FTX proteins form a clade different from non-toxic protein clade (Supplementary  
241 Fig. S12b).

242

243 (f) Aminopeptidase (APaseN)

244 Aminopeptidases (EC 3.4.11) remove one or more specific N-terminal residues from  
245 target proteins or peptides. For example, aminopeptidase L (APL: leucyl  
246 aminopeptidase) removes an N-terminal leucine residue. Aminopeptidase A (APA) and  
247 aminopeptidase B (APB) remove an acidic N-terminal residue and a basic N-terminal  
248 residue, respectively. Aminopeptidase N (APN) removes neutral N-terminal residues,  
249 typically alanine. To date, several aminopeptidase activities have been detected in  
250 venoms from elapids and vipers, and the cDNA sequence of APA from *Gloydius*  
251 *blomhoffii brevicaudus* snake has been determined<sup>47</sup>.

252 In this study, we identified two *svAPases* genes and ten *nvAPases* genes  
253 (Supplementary Fig. S13a). *svAPases* genes include *APase01* (habu1\_s1390\_g05001)  
254 and *APase 03* (habu1\_s3769\_g12636), which encode APN and APA, respectively. They  
255 reside in independent scaffolds. On the other hand, ten *nvAPases* genes include  
256 aminopeptidase-like (*APNPEPL*) (habu1\_s5205\_g15384), *APB*  
257 (habu1\_s89848\_g19021), *APO* (habu1\_s4166\_g13605), *APQ* (habu1\_s3446\_g11762),  
258 *APD* (habu1\_s133\_g00676), two *APMs* (habu1\_s7599\_g18195 and  
259 habu1\_s9114\_g19166), and three *XPAPs* (habu1\_s4753\_g14695, habu1\_s4159\_g13556,  
260 and habu1\_s1233\_g04248) (Supplementary Fig. S13a).

261 Molecular phylogeny shows that APN and APA form a clade, and this SV-related clade  
262 has affinity with a clade including APases O, B and Q (Supplementary Fig. S13b).

263

264 (g) Cysteine-rich secretory proteins (CRISP)

265 Cysteine-rich secretory proteins (CRISP) are glycoproteins implicated in the  
266 mammalian male reproductive functions spanning haploid germ cell development,  
267 epididymal maturation, capacitation, motility, and the actual processes of fertilization<sup>48</sup>.

268 The first discovered CRISP, acidic epididymis glycoprotein (AEG, also known as  
269 protein D/E or CRISP-1), is an androgen-responsible secretory protein involved in  
270 gamete fusion. Two other mammalian CRISPs, testis-specific CRISP-2 (TPX-1) and  
271 salivary gland-specific CRISP-3 (28 kDa specific granule protein, SGP28) have been  
272 isolated and characterized.

273 CRISP-family proteins belonging to CRISP-3 have also been found in various snake  
274 venoms<sup>49-52</sup> and the Mexican beaded lizard<sup>53-55</sup>. CRISPs contain conserved C-terminal  
275 helical bundle subdomains termed ion channel regulatory (ICR) domains. ICR domains  
276 show homology and similar disulfide-bonding patterns to peptide toxins, BgK and ShK,  
277 which are potent inhibitors of K channels isolated from the sea anemones, *Bunodosoma*  
278 *granulifera*<sup>56, 57</sup> and *Stichodactyla helianthus*<sup>58, 59</sup>, respectively. For example, triflin,  
279 ablomin, latisemin, ophanin and piscivorin block smooth muscle contraction caused by  
280 inhibition of L-type Ca<sup>2+</sup> channels. Naturin from *Naja atra* acts as a blocker of BK<sub>Ca</sub>  
281 channels<sup>60</sup>. On the other hand, unique CRISP family proteins, pseudechetoxin (PsTx)  
282 and pseudecin, which block olfactory and retinal cyclic nucleotide-gated ion (CNC)

283 channels, and crovirin, which shows anti-parasitic activity against infective  
284 trypanosoma forms have been identified<sup>61</sup>. Thus, venom CRISPs show specific  
285 activities against a variety of ion channels and possess various physiological activities.  
286 To date, cDNAs (transcriptome data) for triflin (AF384219.1, AB848115.1,  
287 AB985232.1) and CRISPs with EGF-like domains (AB851959.1) have been identified  
288 in *P. flavoviridis* snake venom<sup>50,32</sup>.

289 The present study identified four CRISP-related genes, *CRISP01* to *CRISP04*, in the *P.*  
290 *flavoviridis* genome (Supplementary Fig. S14a). The genes encoding triflin (*CRISP01*;  
291 Gene IDs: habu1\_s22025\_g22470a) and a novel triflin-like peptide (*CRISP02*; Gene  
292 IDs: habu1\_s22025\_g22470b) were located in the same scaffold,  
293 habu1\_scaffold\_22025 (Acc no. BFFQ01031149) (Supplementary Fig. S14a). On the  
294 other hand, genes encoding two types of CRISP with an EGF-like domain, *CRISP03*  
295 (Gene ID: habu1\_s1243\_g04322) and *CRISP04* (Gene ID: habu1\_s264\_g01336), were  
296 located on habu1\_scaffold\_1243 (Acc no. BFFQ01000866) and habu1\_scaffold\_264  
297 (Acc no. BFFQ01000220), respectively (Supplementary Fig. S14a). Interestingly,  
298 although both triflin and triflin-like genes contain eight exons (ex1 to ex8 for triflin, and  
299 ex1a, ex1b, ex2 to ex7 for triflin-like) and their N-terminal regions including signal  
300 sequences and pathogenesis-related CRISP domains corresponding to exons 2 to 5 were  
301 conserved, the number and structures of exons encoding C-terminal regions, including  
302 ICR domains were quite different (Supplementary Figs. S14c and S14d). These results  
303 suggest that *CRISP/triflin* and *triflin-like* genes arose through the gene duplication and  
304 exon shuffling. On the other hand, genes encoding CRISPs with EGF-like domains

305 showed the same exon-intron architecture and homologies without a C-terminal  
306 extension of *CRISP04*. Molecular phylogeny supports these notions (Supplementary Fig.  
307 S14b)

308

309 (h) SPRY/Vespryns (Vespryn)

310 The vespryn family is a relatively recently discovered as a snake venom protein family  
311 containing consensus PRY-SPRY domains. The SPRY domain is an interaction module  
312 consisting of ~120 amino acids, which is implicated in the biological pathways  
313 including innate and adaptive immunity. The SPRY domain was first identified in *SPIA*  
314 (spore lysis A) kinase from *Dictyostelium discoideum*, and in mammalian ryanodine  
315 receptors<sup>62, 63</sup>. Ohanin, which was isolated from the king cobra, *Ophiophagus hannah*  
316 venom, shows dose-dependent hypolocomotive and hyperalgesic effects in mice<sup>64, 65</sup>.

317 The present study identified a gene encoding vespryn (*Ves01*) and another 11 genes  
318 encoding SPRY domain-containing proteins (*Ves02* to *Ves12*) (Supplementary Fig.  
319 S15a). *Vespryn* gene includes 5 exons and 4 introns, while butyrophilin2A1  
320 (*btn2A1*)-encoding gene (*Ves02*) includes 10 exons. Butyrophilins (BTN) are members  
321 of a protein family that belong to immunoglobulin superfamily that have  
322 immunomodulatory functions. Both vespryn and butyrophilin genes are located on the  
323 same scaffold, *habu1\_scaffold\_402940* (Acc no. BFFQ01082524) (Supplementary Fig.  
324 S15a), and molecular phylogeny shows affinity or similarity of these two gene products  
325 (Supplementary Fig. S15b), indicating that vespryn is more likely to be derived from  
326 ancestor gene of butyrophilin.



327

328 (i) 5'-Nucleotidases (5Nase)

329 5'-nucleotidase (5Nase, EC: 3.1.3.5) dephosphorylates 5'-mononucleotides to release  
330 purine and pyrimidine nucleosides. Viperidae and crotalidae venoms display more  
331 5'-nucleotidase activity than elapididae venoms<sup>66</sup>. 5Nase inhibits platelet aggregation due  
332 to the liberation of adenosine. Venom 5Nase act synergistically *in vivo* with other toxins  
333 such as ADPases, hemorrhagic proteases, fibrinogenases and disintegrins to exert a  
334 more pronounced anti-coagulant effect<sup>67</sup>.

335 The present study identified one sv5Nase gene, *sv5Nase1* (habu1\_s6028\_g16570)  
336 (Supplementary Fig. S16a). In addition, the *P. flavoviridis* genome contained at least 10  
337 nv5Nase (habu1\_s1426\_g05181 for *5Nase02* to habu1\_s2849\_g10145 for *5Nase11*)  
338 (Supplementary Fig. S16a). Molecular phylogeny shows that *sv5Nase01* form a clade  
339 with other SV genes while the other nv5Nase genes cluster with other reptile NV 5Nase  
340 genes (Supplementary Fig. S16b), indicating the affinity or similarity of the SV and NV  
341 gene products in the 5Nase01 clade. An ancestral gene appears to have diverged first  
342 into NV forms, and then one of them has been functionalized as a toxin (Supplementary  
343 Fig. S16b).

344

345 (j) Dipeptidyl Peptidase IV (DPP IV)

346 Dipeptidyl peptidases (DPP) (EC 3.4.14.-) cleave dipeptides from the N-termini of  
347 polypeptides, and are classified into nine distinct types (DPP I-IV, VI-X). Mammalian  
348 DPP-IV is a highly glycosylated serine protease and a type II membrane protein that

349 selectively cleaves N-terminal dipeptides, Xxx-Pro (or Ala) from polypeptides. DPP-IV  
350 has been detected on the surface of immune cells as being CD26, a cell-surface  
351 differentiation marker in the T cell lineage<sup>68</sup>, and also detected in serum<sup>69</sup> and seminal  
352 plasma<sup>70</sup> as a soluble form. More recently, it has been reported that DPP-IV plays as a  
353 processing enzyme for liberation of biologically active peptides in the skin of *Xenopus*  
354 *laevis*<sup>71</sup> and snake venoms<sup>72</sup>. It was proposed that svDPP-IV contribute to hypotension  
355 by destroying vasoconstrictive peptides such as Peptide YY, neuropeptide Y and  
356 substance P, and shows synergistic effect with BPPs-ACE inhibitory peptide<sup>73</sup>.  
357 The present study identified 8 genes encoding dipeptidyl peptidases, *DPP01* to *DPP08*  
358 (Supplementary Fig. S17a), one of which was venom svDPP-IV (*DPP05*,  
359 *habu1\_s1020\_g03622*). Molecular phylogeny supports the evolutionary history of  
360 svDPP-IV and other NV DPPs that diversified into 8 genes (Supplementary Fig. S17b).

361

#### 362 (k) Hyaluronidases (Hyal)

363 Hyaluronidases (Hyals) (EC: 3.2.1.35) are enzymes that cleave predominantly the  
364 glycosaminoglycans, hyaluronan (HA) and less efficiently, chondroitin (Ch) and  
365 chondroitin sulphate (ChS) in the extracellular matrix (ECM) of animals<sup>74</sup>. HA  
366 participate in physiological processes such as embryogenesis, cell migration, wound  
367 healing, tissue turn over, and malignancies<sup>75</sup>.

368 Hyaluronidase is also common component of snake venoms known as a venom  
369 spreading factor to degrade HA in ECM<sup>76</sup>. To date, the full-length cDNA sequences  
370 encoding snake venom Hyal (svHyal) have been reported from *Echis ocellatus*

371 (EOC00242; DQ840249), *Echis pyramidum leakeyi* (EplHy-1: DQ840253), *Bitis*  
372 *arientans* (BaHy-1: DQ840256, BaHy-2: DQ840257), *Cerastes cerastes cerastes*  
373 (CccHy-1: DQ840250, CccHy-3: DQ840251, CccHy-4: DQ840257)<sup>77</sup> and, *Bothrops*  
374 *pauloensis*<sup>78</sup>. They showed different primary structures compared with other Hyals.

375

376 In this study, we identified six genes encoding *P. flavoviridis* Hyals, *Hyal01* to *Hyal06*  
377 (Supplementary Fig. S2a). *Hyal01* (habu1\_s7188\_g17820) encodes a svHyal, which  
378 was composed of six exons. On the other hand, other Hyal genes, *Hyal02* (*HYAL1*),  
379 *Hyal03* (*HYAL2*), *Hyal04* (*HYAL2/4*), *Hyal05* (*HYAL3*) and *Hyal06* (*HYAL4*), showed  
380 quite different gene structures with different exon numbers (four to seven), although  
381 core exons (exons 4 and 5 in *svHyal*) were conserved in all genes. Molecular phylogeny  
382 supports such a relationship between *P. flavoviridis* hyaluronidase family members  
383 (Supplementary Fig. S2a).

384

385 (I) Nerve growth factor (NGF)

386 Nerve growth factor (NGF) is one of polypeptide hormones belonging to the  
387 neurotrophin family that is necessary for neuronal differentiation, survival, and  
388 maintenance. The neurotrophin family also includes brain-derived neurotrophic factor  
389 (BDNF)<sup>79</sup>, neurotrophin-3 (NT-3)<sup>80</sup>, and neurotrophin-4/5 (NT-4/5)<sup>81</sup>, which interact  
390 with cell surface receptors, p75 and Trk subfamily receptors, and stimulate tyrosine  
391 phosphorylation of Trk receptors<sup>82</sup>. NGFs are present in the venoms of elapids and  
392 viperids<sup>83, 84</sup>. Cobra NGFs show lower biological activities than mouse NGF<sup>85</sup>. More

393 recently, Sunagar et al reported that a duplication of NGF genes occurred in *Elaphidae*  
394 snake, and discussed their putative roles in venom and their unique molecular evolution  
395 under the positive-selection<sup>86</sup>. Furthermore, Hargreaves *et al.* reported the  
396 transcriptomic analysis for body tissues and salivary and venom glands from five  
397 species of venomous and nonvenomous reptiles, and discussed their molecular  
398 evolution based on the expression profiles<sup>87</sup>. It suggested that snake venom does not  
399 evolve through the hypothesized process of duplication and recruitment of genes  
400 encoding body proteins, and that many proposed venom toxin genes have been  
401 restricted to the venom gland following duplication, not recruited. In the case for NGF,  
402 the nontoxic form of NGF is expressed in a diversity of tissues, including the salivary  
403 glands of nonvenomous reptiles. The putatively toxic NGF has therefore also been  
404 restricted to the venom gland following duplication<sup>87</sup>.

405 In the *P. flavoviridis* genome, we identified a single gene encoding svNGF located on  
406 habu1\_scaffold\_3536 (*Neu01*, Gene ID: habu1\_s3536\_g11975) (Supplementary Fig.  
407 S2b), which consists of four exons (Ex1 to 4) as in chicken and mammalian NGFs.  
408 Interestingly, the expression profiles of *P. flavoviridis* NGF is specific to venom gland  
409 although several transcripts with different 5' exons were present (Supplementary Table  
410 S7). This alternative usage of 5' exons containing the 5'-untranslated region has been  
411 reported in the chicken NGF gene<sup>88</sup>.

412 Furthermore, neurotrophin family genes encoding, *Neu02*, *03* and *04*, BDNF (Gene ID:  
413 habu1\_s3803\_g12736), NT-3 (habu1\_s105\_g00548), and NT-4 (habu1\_s6123\_g16797),  
414 respectively, were identified in the genome (Supplementary Fig. S2b). Molecular

415 phylogeny indicates that *svNGF* and other three *BDNF*, *NT-3* and *NT-4* diverged first in  
416 their history (Supplementary Fig. S2b), suggesting that the neurotrophin family  
417 including NGF is a typical example of SV genes generated by 2R-WGD.

418

419 (m) Vascular endothelial growth factor-like proteins (VEGF)

420 Vascular endothelial growth factors (VEGFs) are key regulators of vascular  
421 development during embryogenesis (vasculogenesis), blood-vessel formation  
422 (angiogenesis), skeletal growth, and reproductive functions<sup>89</sup>. In mammals, five VEGFs  
423 (VEGF-A, -B, -C, -D, and -E (viral VEGF)) have been identified so far. These ligands  
424 bind to three receptor tyrosine kinases, VEGF receptor-1 (VEGFR1, Flt-1, *fms*-like  
425 tyrosine kinase-1), -2 (VEGFR2, KDR, kinase insert domain-containing receptor) and  
426 -3 (VEGFR3, Flt-4), as well as to co-receptors such as heparan sulphate glycans.  
427 VEGFs have been found in snake venoms, and they showed strict receptor specificities  
428 compared with mammalian VEGF. For example, Vammin and VR-1 from the venoms  
429 of *Vipera a. ammodytes* and *Daboia r. russelli*, respectively, bind only KDR with high  
430 affinity but not to other VEGF receptors<sup>90</sup>. *Tf*-svVEGF from *P. flavoviridis* venom have  
431 been shown to bind Flt-1 in preference to KDR, unlike vammin and VR-1<sup>91</sup>. The gene  
432 structures of tissue- and venom-types VEGFs from *P. flavoviridis* have been reported<sup>92</sup>.  
433 We identified three VEGF genes in the *P. flavoviridis* genome (Supplementary Fig.  
434 S18a). One is *svVEGF01* (habu1\_s565\_g02679) encoding svVEGF-F and the others are  
435 *nvVEGF01* and *nvVEGF02*, encoding *VEGF-A* (habu1\_s6836\_g17529) and *VEGF-C*  
436 (habu1\_s9381\_g19343), respectively. Molecular phylogeny indicates that *svVEGF-F* is

437 within toxin-related protein group (Supplementary Fig. S18b).

438

439 (n) L-Amino acid oxidases (LAAO)

440 L-Amino acid oxidases (LAAO: EC 1.4.3.2) are flavoenzymes that catalyze the  
441 oxidative deamination of L-amino acids to produce  $\alpha$ -keto acids with the release of  $\text{NH}_3$   
442 and  $\text{H}_2\text{O}_2$ . LAAOs are abundant in some snake venoms and are cytotoxic due to the  
443 liberated  $\text{H}_2\text{O}_2$ , which also induces or inhibits platelet aggregation<sup>93</sup>. It was reported that  
444 soluble guanylate cyclase (sGC) is activated by  $\text{H}_2\text{O}_2$  in the presence of superoxide  
445 dismutase (SOD), and that  $\text{H}_2\text{O}_2$  activates nitric oxide synthase (NOS). Thus, LAAOs  
446 show the synergic effects on hypertension with other toxins such as BPPs via  $\text{H}_2\text{O}_2$   
447 production<sup>73</sup>.

448 The *P. flavoviridis* genome contains three genes for L-amino acid oxidase, *LAAO\_01*,  
449 *LAAO\_02*, and *LAAO\_03* (Gene ID: *habu1\_s402940\_g24950*, *g24949*, and *g24947*,  
450 respectively), all of them being located in the same scaffold (Supplementary Fig. S2c).  
451 The results indicate that these LAAO genes diversified by gene duplication. *LAAO\_01*  
452 encodes the venom type L-amino acid oxidase composed of seven exons. Molecular  
453 phylogeny indicates that *LAAO\_01* encodes the venom enzyme, but *LAAO\_02*, and  
454 *LAAO\_03* encode non-venom type (Supplementary Fig. S2c).

455

456 (o) Phosphodiesterases (PDE)

457 Phosphodiesterases (PDEs: E.C. 3.1.4.1) catalyze the hydrolysis of phosphodiester  
458 bonds of cyclic adenosine monophosphate (cAMP) and cyclic guanosine

459 monophosphate (cGMP). PDEs have been isolated and characterized from numerous  
460 snake venoms. They are generally high molecular mass proteins (> 90 kDa) with single  
461 polypeptide chains. *P. flavoviridis* venom PDEs are reported to be  
462 metalloproteins<sup>94</sup>. More recently, Trummal et al. reported the structure and  
463 characterization of PDE from *Vipera lebetina* venom<sup>95</sup>. It inhibits ADP- and  
464 collagen-induced platelet aggregation in a dose-dependent manner. Mamillapalli *et al*  
465 reported that the activity of svPDE is enhanced by lysophospholipids, which are  
466 liberated by PLA2 during venomous action<sup>96</sup>. Thus, svPDE and svPLA2 show the  
467 synergistic effect.

468 In this study, we identified two PDE genes, *PDE01* (Gene ID: habu1\_s149\_g00804)  
469 and *PDE02* (habu1\_s149\_g008059), which are tandemly located on  
470 habu1\_scaffold\_149 (Supplementary Fig. S19a). Molecular phylogeny shows that *Pr.*  
471 *flavoviridis* *PDE01* is the venom enzyme and *PDE02* is the tissue form (Supplementary  
472 Fig. S19b). *PDE01* and *PDE02* include 889 and 904 amino acids, respectively, and  
473 both conserve catalytic amino acid residues. Although both genes are encoded by 25  
474 exons with the same exon-intron junctions, they showed different expression profiles.  
475 *PDE01* is expressed only in the venom gland. The cAMP-specific 0', 5'-cyclic  
476 phosphodiesterase gene was also identified on the same scaffold (Gene ID:  
477 habu1\_s149\_g00834) (Supplementary Fig. S19a). However, it showed no sequence  
478 homology with *PDE01* and *PDE02*.

479

480 (p) Phospholipases B (PLB)

481 Phospholipases B (PLB: EC 3.1.1.5) are enzymes with combined PLA<sub>1</sub> and PLA<sub>2</sub>  
482 activities that cleaves acyl chains from both *sn*-1 and *sn*-2 positions of phospholipids.  
483 PLB also acts on lysolecithin, which is formed by PLA<sub>2</sub>, then PLBs are known as  
484 lysophospholipases. PLBs are present in most snake venoms, but generally at very  
485 low levels<sup>97</sup>.

486 In this study, we identified five PLB genes, *PLB01* (Gene ID: habu1\_s1233\_g04284),  
487 *PLB02* (habu1\_s1964\_g07200), *PLB03*, (habu1\_s313\_g01520), *PLB04*  
488 (habu1\_s3352\_g11424), and *PLB05* (habu1\_s303\_g01427) in the *P. flavoviridis*  
489 genome, (Supplementary Fig. S20a). *PLB01* showed high sequence identity (99-85%)  
490 with phospholipases B isolated from other snakes. On the other hand, *PLB02* is  
491 phospholipase B-like 2 and *PLB03* is a membrane-associated PLB1. *PLB05* and  
492 *PLB06* are 60 kDa lysophospholipase and lysophospholipase-like protein, respectively.  
493 *PLB01* and *PLB02* showed low but distinct sequence similarity (30.2%) each other,  
494 while *PLB03*, *PLB04* and *PLB05* showed no similarity. From transcriptome data,  
495 *PLB01* showed venom-specific expression, while *PLB02*, *PLB04* and *PLB05* are  
496 ubiquitous housekeeping genes, and *PLB03* showed small intestine-specific expression.  
497 Molecular phylogeny supports the evolutionary history of SV and other NV genes  
498 (Supplementary Fig. S20b).

499

500 (q) Bradykinin-potentiating peptide (BPP) and C-type natriuretic peptide (CNP)

501 Bradykinin-potentiating peptides (BPPs) are known as painful stimulation factors  
502 following snakebites through the inhibition of enzymatic digestion of bradykinin. BPPs



503 are also well known as inhibitors of angiotensin-converting enzyme (ACE), and were  
504 the basis for development of antihypertensive drugs such as captopril and enalapril<sup>98</sup>.  
505 BPPs activate argininosuccinate synthetase, resulting in increased nitric oxide  
506 production, which reduces arterial blood pressure<sup>99</sup>. Typically, BPPs contain 5 to 13  
507 amino acid residues with a pyroglutamyl residue (pGlu) at the N-terminus and a proline  
508 residue at the C-terminus a high proline content and/or the tripeptide sequence Ile–Pro–  
509 Pro<sup>100</sup>.

510 Natriuretic peptide (NP) plays a fundamental role in cardiovascular homeostasis by  
511 modulating fluid and electrolyte balance and vascular tone, and exhibit hypotensive and  
512 vasodepressor activity by activating natriuretic receptors. Previously, we have cloned  
513 cDNAs (NCBI AB749764.1) encoding both BPPs and C-type natriuretic peptide (CNP)  
514 from *P. flavoviridis* and other snakes<sup>101, 102</sup>, suggesting that CNP coded on the same  
515 gene as BPP. Recently, Aird *et al.* reported the transcriptomes and proteomes of *P.*  
516 *flavoviridis* and *Ovophis okinavensis* venom, showed only two BPP-related peptides,  
517 QSKPGRSPPIISP, which corresponds to BPP1\_3, and QGRPRSEVPP<sup>101</sup>.

518 In the *P. flavoviridis* genome, we identified two genes. *CNP01* encodes a BPP-CNP  
519 precursor protein, which was located at two scaffolds, habu1\_scaffold\_258676: 1...337  
520 and habu1\_scaffold\_4348: 15402 ... 16141 (Gene model ID: habu1\_s258676\_g24318  
521 and habu1\_s4348\_g14020, respectively) (Supplementary Fig. S21a). *CNP02* encodes  
522 B-type natriuretic peptide (BNP) (habu1\_s20540\_g224311) (Supplementary Fig. S21a).  
523 The former is venom peptides, while the latter is of another tissue origin. Molecular  
524 phylogeny supports the evolutionary history of SV and other NV genes (Supplementary

525 Fig. S21b).

526

527 (r) Glutaminyl peptide cyclotransferases (GPCase)

528 Glutaminyl peptide cyclases (GPCase, QC; glutaminyl cyclotransferase, EC 2.3.2.5)

529 catalyze N-terminal pyroglutamate (pGlu) formation on proteins and peptides. This

530 N-terminal modification confers resistance to aminopeptidase degradation. Among

531 various snake venom components, glutaminyl cyclase (svQC) is one of the least

532 understood protein family. Wang et al. reported the presence of vQC activity in a wide

533 spectrum of venom species and their structures and characterization including cDNA

534 sequences from seven species<sup>103</sup>. svQC present in each venom with the low content

535 and only a single form, suggesting its house-keeping role for posttranslational

536 modification of the venom proteins. For example, svQC cyclizes the N-terminal Gln

537 residue of snake venom bioactive peptides and proteins including BPPs<sup>100,104</sup> and

538 crotoxin subunits<sup>105</sup>, resulting the stability and prolongation of peptides in prey plasma

539 by protecting against the degradation.

540 We identified two genes, *svGPCase01* (habu1\_s510\_g02384) and *nvGPCase02*

541 (habu1\_s3067\_g10859), encoding glutaminyl peptide cyclases in *P. flavoviridis* genome

542 (Supplementary Fig. S22a). Both *svGPCase01* and *nvGPCase02* were composed of

543 seven exons with the conserved exon-intron junctions. Recently, Aird et al. reported

544 four QC transcripts for two pairs of toxins (AB848133, AB848134, AB851933,

545 AB851934)<sup>106</sup>, the correspondence of those to *svGPCase01* and *nvGPCase02* remains

546 to be elucidated. Molecular phylogeny shows that *svGPCase01* forms a clade with other

547 SV members while *nvGPCase02* is grouped with other NV members (Supplementary  
548 Fig. S22b). This indicates that the product of *svGPCase01* is sure to act as toxin or toxin  
549 stabilizing factor in *P. flavoviridis* venom although QC activity has not yet been  
550 demonstrated in the venom.

551

## 552 References

- 553 1. Fox, J. W, & Serrano, S. M. T. Structural considerations of the snake venom  
554 metalloproteinases, key members of the M12 reprolysin family of  
555 metalloproteinases. *Toxicon* 2005; 45, 969–985.
- 556 2. Worlfsberg, T. G. et al. ADAM, a widely distributed and developmentally  
557 regulated gene family encoding membrane proteins with a disintegrin and  
558 metalloprotease domain. *Devlop Biol.* 1995; 169, 378-383.
- 559 3. Edwards, D. R., Handsley, M. M., Pennington, C. J. The ADAM  
560 metalloproteinases. *Mol. Asp. Med.* 2009; 29, 258–289.
- 561 4. Reiss K, Saftig P. The “A Disintegrin and Metalloprotease” (ADAM) family of  
562 sheddases: Physiological and cellular functions. *Semin Cell Dev Biol.* 2009; 20:  
563 126–37.
- 564 5. Takeda S. ADAM and ADAMTS family proteins and snake venom  
565 metalloproteinases: A structural overview. *Toxins.* 2016; 8: 155.
- 566 6. Seeger WH, Ouyang C. Snake venoms and blood coagulation, In: Lee CY editor.  
567 Snake venoms. New York: Springer; 1979. p. 684-750.

- 568 7. Shieh TC, Kawabata S, Kihara H, Ohno M, Iwanaga S. Purification and  
569 characterization of a coagulant enzyme from *Trimeresurus flavoviridis* venom. J  
570 Biochem. 1985; 98: 713–61.
- 571 8. Deshimaru M, Ogawa T, Nakashima K, Nobuhisa I, Chijiwa T, Shimohigashi Y,  
572 et al. Accelerated evolution of crotalinae snake venom gland serine proteases.  
573 FEBS Lett. 1996; 397: 83-8.
- 574 9. Sunagawa M, Nakamura M, Kosugi T. Cloning of habutobin cDNA and  
575 antithrombotic activity of recombinant protein. Biochem Biophys Res Commun.  
576 2007; 362: 899-904.
- 577 10. Yamamoto C, Tsuru D, Oda-Ueda N, Ohno M, Hattori S, Kim ST. Flavoxobin, a  
578 serine protease from *Trimeresurus flavoviridis* (habu snake) venom,  
579 independently cleaves Arg726-Ser727 of human C3 and acts as a novel,  
580 heterologous C3 convertase. Immunology. 2002; 107: 111-7.
- 581 11. Komori Y, Tatematsu R, Tanida S, Nikai T. Thrombin-like enzyme, flavovilase,  
582 with kinin-releasing activity from *Trimeresurus flavoviridis* (habu) venom. J Nat  
583 Toxins. 2001; 10: 239-48.
- 584 12. Tatematsu R, Komori Y, Nikai T. A new thrombin-like enzyme, flavoviridiobin  
585 from the venom of *Trimeresurus flavoviridis* (habu). J Nat Toxins. 2000; 9:  
586 327-39.
- 587 13. Serrano SM, Hagiwara Y, Murayama N, Higuchi S, Mentele R, Sampaio CA, et  
588 al. Purification and characterization of a kinin-releasing and fibrinogen-clotting  
589 serine proteinase (KN-BJ) from the venom of *Bothrops jararaca*, and molecular

- 590 cloning and sequence analysis of its cDNA. Eur J Biochem. 1998; 251: 845-53.
- 591 14. van Leeuwen BH, Evans BA, Tregear G, Richards RI. Mouse glandular kallikrein  
592 gene identification, structure, and expression of the renal kallikrein gene. J Biol  
593 Chem. 1986; 261: 5529-35.
- 594 15. Drickamer K. Evolution of Ca(2+)-dependent animal lectins. Prog Nucl Acid Res  
595 Mol Biol. 1993; 45: 207-32.
- 596 16. Drickamer K, Fadden AJ. Genomic analysis of C-type lectins. Biochem Soc  
597 Symp. 2002; 69: 59-72.
- 598 17. Zelensky AN, Gready JE. The C-type lectin-like domain superfamily. FEBS J.  
599 2005; 272: 6179-217.
- 600 18. Flexner S, Noguchi H. The constitution of snake venom and snake sera. J Pathol.  
601 1903; 8: 379-410.
- 602 19. Gartner TK, Stocker K, Williams DC. Thrombolectin: a lectin isolated from  
603 *Bothrops atrox* venom. FEBS Lett. 1980; 117: 13-6.
- 604 20. Sartim MA, Sampaio SV. Snake venom galactoside-binding lectins: a structural  
605 and functional overview. J Venom Anim Toxins Incl Trop Dis. 2015; 21: 35.
- 606 21. Ogawa T, Chijiwa T, Oda-Ueda N, Ohno M. Molecular diversity and accelerated  
607 evolution of C-type lectin-like proteins from snake venom. Toxicon. 2005; 45:  
608 1-14.
- 609 22. Morita T. Structures and functions of snake venom CLPs (C-type lectin-like  
610 proteins) with anticoagulant-, procoagulant-, and platelet-modulating activities.  
611 Toxicon 2005; 45: 1099-114.

- 612 23. Dijkstra BW, Drenth J, Kalk KH. Active site and catalytic mechanism of  
613 phospholipase A<sub>2</sub>. Nature 1981; 289: 604-6.
- 614 24. Dufton MJ, Hider RC. Classification of phospholipases A<sub>2</sub> according to sequence.  
615 Evolutionary and pharmacological implications. Eur J Biochem. 1983; 137:  
616 545-51.
- 617 25. Maraganore JM, Merutka G, Cho W, Welches W, Kézdy FJ, Heinrikson RL. A  
618 new class of phospholipases A<sub>2</sub> with lysine in place of aspartate 49. Functional  
619 consequences for calcium and substrate binding. J Biol Chem. 1984; 259:  
620 13839-43.
- 621 26. Renetseder R, Brunie S, Dijkstra BW, Drenth J, Sigler PB. A comparison of the  
622 crystal structures of phospholipase A<sub>2</sub> from bovine pancreas and *Crotalus atrox*  
623 venom. J Biol Chem. 1985; 260: 11627-34.
- 624 27. Holland DR, Clancy LL, Muchmore SW, Ryde TJ, Einspahr HM, Finzel BC, et  
625 al. The crystal structure of a lysine 49 phospholipase A<sub>2</sub> from the venom of the  
626 cottonmouth snake at 2.0-Å resolution. J Biol Chem. 1990; 265: 17649-56.
- 627 28. Suzuki A, Matsueda E, Yamane T, Ashida T, Kihara H, Ohno M. Crystal  
628 structure analysis of phospholipase A<sub>2</sub> from *Trimeresurus flavoviridis* (Habu  
629 snake) venom at 1.5 Å resolution. J Biochem. 1995; 117: 730-40.
- 630 29. Ikeda N, Chijiwa T, Matsubara K, Oda-Ueda N, Hattori S. Matsuda Y, Ohno M.  
631 Unique structural characteristics and evolution of a cluster of venom  
632 phospholipase A<sub>2</sub> isozyme genes of *Protobothrops flavoviridis* snake. Gene. 2010;  
633 461: 15-25.

- 634 30. Nakashima K, Ogawa T, Oda N, Hattori M, Sakaki Y, Kihara H, Ohno M.  
635 Accelerated evolution of *Trimeresurus flavoviridis* venom gland phospholipase  
636 A<sub>2</sub> isozymes. Proc Natl Acad Sci U S A. 1993; 90: 5964-8.
- 637 31. Nakashima, K. et al. Accelerated evolution in the protein-coding regions is  
638 universal in crotalinae snake venom gland phospholipase A<sub>2</sub> isozyme genes. *Proc.*  
639 *Natl. Acad. Sci. USA.* **92**, 5605-5609 (1995)
- 640 32. Ohno, M. et al. Molecular evolution of snake toxins: Is the functional diversity of  
641 snake toxins associated with a mechanism of accelerated evolution? *Prog. Nucleic*  
642 *Acid Res. Mol. Biol.* **59**, 307-364 (1998).
- 643 33. Ogawa, T. et al. Unusually high conservation of untranslated sequences in cDNAs  
644 for *Trimeresurus flavoviridis* phospholipase-A<sub>2</sub> isozymes. *Proc. Natl. Acad. Sci.*  
645 *USA.* **89**, 8557-8561 (1992).
- 646 34. Ogawa, T., Kitajima, M., Nakashima, K., Sakaki, Y. & Ohno, M. Molecular  
647 evolution of group II phospholipases A<sub>2</sub>. *J. Mol. Evol.* **41**, 867-877 (1995).
- 648 35. Nair DG, Fry BG, Alewood P, Kumar PP, Kini RM. Antimicrobial activity of  
649 omwaprin, a new member of the waprins family of snake venom proteins.  
650 *Biochem J.* 2007; 402: 93-104.
- 651 36. Fry, B. G. et al. Evolution of an arsenal: structural and functional diversification  
652 of the venom system in the advanced snakes (Caenophidia). *Mol. Cell*  
653 *Proteomics.* **7**, 215-46 (2008).
- 654 37. St Pierre Let al. Common evolution of waprins and kunitz-like toxin families in  
655 Australian venomous snakes. *Cell Mol Life Sci.* 2008; 65: 4039-54.

- 656 38. Pahari S, Mackessy SP, Kini MR. The venom gland transcriptome of the Desert  
657 Massasauga Rattlesnake (*Sistrurus catenatus edwardsii*): towards an  
658 understanding of venom composition among advanced snakes (Superfamily  
659 Colubroidea). *BMC Mol Biol.* 2007; 8: 115.
- 660 39. Doley R, Pahari S, Reza M. A., Mackessy SP, Kini RM. The gene structure and  
661 evolution of ku-wap-fusin (Kunitz Waprin Fusion Protein), a novel evolutionary  
662 intermediate of the Kunitz serine protease inhibitors and Waprans from *Sistrurus*  
663 *catenatus* (Massasauga Rattlesnake) venom glands. *The Open Evolution J.* 2010;  
664 4: 31-41.
- 665 40. Mourao CBF, Schwartz EF. Protease inhibitors from marine venomous animals  
666 and their counterparts in terrestrial venomous animals. *Mar Drugs.* 2013; 11:  
667 2069-112.
- 668 41. Bohlen CJ, Chesler AT, Sharif-Naeini R, Medzihradzsky KF, Zhou S, King D, et  
669 al. A heteromeric Texas coral snake toxin targets acid-sensing ion channels to  
670 produce pain. *Nature.* 2011; 479: 410–4.
- 671 42. Utkin YN. Three-finger toxins, a deadly weapon of elapid venom--milestones of  
672 discovery. *Toxicon.* 2013; 62: 50-5.
- 673 43. Sunagar K, Jackson TN, Undheim EA, Ali SA, Antunes A, Fry BG.  
674 Three-fingered RAVeRs: Rapid accumulation of variations in exposed residues of  
675 snake venom toxins. *Toxins.* 2013; 5: 2172-208.
- 676 44. Ménez A. Functional architectures of animal toxins: a clue to drug design?  
677 *Toxicon.* 1998; 36: 1557–72.



- 678 45. Tsetlin V. Snake venom  $\alpha$ -neurotoxins and other 'three-finger' proteins. Eur J  
679 Biochem. 1999; 264: 281–6.
- 680 46. Junqueira-de-Azevedo IL, Ching AT, Carvalho E, Faria F, Nishiyama MY Jr, Ho  
681 PL, Diniz MR. *Lachesis muta* (Viperidae) cDNAs reveal diverging pit viper  
682 molecules and scaffolds typical of cobra (Elapidae) venoms: implications for  
683 snake toxin repertoire evolution. Genetics. 2006; 173: 877-89.
- 684 47. Ogawa Y, Murayama N, Fujita Y, Yanoshita R. Characterization and cDNA  
685 cloning of aminopeptidase A from the venom of *Gloydius blomhoffi brevicaudus*.  
686 Toxicon. 2007; 49: 1172–81.
- 687 48. Burnett LA, Washburn CA, Sugiyama H, Xiang X, Olson JH, Al-Anzi B, Bieber  
688 AL, Chandler DE. Allurin, an amphibian sperm chemoattractant having  
689 implications for mammalian sperm physiology. Int Rev Cell Mol Biol. 2012; 295:  
690 1–61.
- 691 49. Yamazaki Y, Brown RL, Morita T. Purification and cloning of toxins from elapid  
692 venoms that target cyclic nucleotide-gated ion channels. Biochemistry. 2002a; 41:  
693 11331–7.
- 694 50. Yamazaki Y, Koike H, Sugiyama Y, Motoyoshi K, Wada T, Hishinuma S, et al.  
695 Cloning and characterization of novel snake venom proteins that block smooth  
696 muscle contraction. Eur J Biochem. 2002b; 269: 2708–15.
- 697 51. Yamazaki Y, Hyodo F, Morita T. Wide distribution of cysteine-rich secretory  
698 proteins in snake venoms: isolation and cloning of novel snake venom  
699 cysteine-rich secretory proteins. Arch Biochem Biophys. 2003; 412: 133–41.

- 700 52. Yamazaki Y, Morita T. Structure and function of snake venom cysteine-rich  
701 secretory proteins. *Toxicon*. 2004; 44: 227-31.
- 702 53. Mochca-Morales J, Martin BM, Possani LD. Isolation and characterization of  
703 helothermine, a novel toxin from *Heloderma horridum horridum* (Mexican  
704 beaded lizard) venom. *Toxicon*. 1990; 28: 299–309.
- 705 54. Morrissette J, Kratzschmar J, Haendler B, El-Hayek R, Mochca-Morales J, Martin  
706 BM, et al. Primary structure and properties of helothermine, a peptide toxin that  
707 blocks ryanodine receptors. *Biophys J*. 1995; 68: 2280–8.
- 708 55. Nobile M, Noceti F, Prestipino G, Possani LD. Helothermine, a lizard venom  
709 toxin, inhibits calcium current in cerebellar granules. *Exp Brain Res*. 1996; 110:  
710 15–20.
- 711 56. Cotton J, Crest M, Bouet F, Alessandri N, Gola M, Forest E, et al. A  
712 potassium-channel toxin from the sea anemone *Bunodosoma granulifera*, an  
713 inhibitor for Kv1 channels. Revision of the amino acid sequence, disulfide-bridge  
714 assignment, chemical synthesis, and biological activity. *Eur J Biochem*. 1997;  
715 244: 192–202.
- 716 57. Dauplais M, Lecoq A, Song J, Cotton J, Jamin N, Gilquin B, et al. On the  
717 Convergent Evolution of Animal Toxins Conservation of a diad of functional  
718 residues in potassium channel-blocking toxins with unrelated structures. *J Biol*  
719 *Chem*. 1997; 272: 4302–9.

- 720 58. Castañeda O, Sotolongo V, Amor AM, Stöcklin R, Anderson AJ, Harvey AL, et  
721 al. Characterization of a potassium channel toxin from the Caribbean Sea  
722 anemone *Stichodactyla helianthus*. *Toxicon* 1995; 33: 603–13.
- 723 59. Tudor JE, Pallaghy PK, Pennington MW, Norton RS. Solution structure of ShK  
724 toxin, a novel potassium channel inhibitor from a sea anemone. *Nat Struct Biol.*  
725 1996; 3: 317–20.
- 726 60. Wang F, Li H, Liu M, Song H, Han H, Wang Q, et al. Structural and functional  
727 analysis of natrin, a venom protein that targets various ion channels. *Biochem*  
728 *Biophys Res Commun.* 2006; 315: 443–8.
- 729 61. Adade CM, Carvalho ALO, Tomaz MA, Costa TFR, Godinho JL, Melo PA, et al.  
730 Crovirin. A snake venom cysteine-rich secretory protein (CRISP) with promising  
731 activity against trypanosoma. *PLoS Negl Trop Dis.* 2014; 8: e3252.
- 732 62. Ponting C, Schultz J, Bork P. SPRY domains in ryanodine receptors (Ca<sup>2+</sup>-release  
733 channels). *Trends Biochem Sci.* 1997; 22: 193–4.
- 734 63. Woo JS, Imm JH, Min CK, Kim KJ, Cha SS, Oh BH. Structural and functional  
735 insights into the B30.2/SPRY domain. *EMBO J.* 2006; 25: 1353-63.
- 736 64. Pung YF, Wong PTH, Kumar PP, Hodgson WC, Kini RM. Ohanin, a novel  
737 protein from king cobra venom, induces hypolocomotion and hyperalgesia in  
738 mice. *J Biol Chem.* 2005; 280: 13137–47.
- 739 65. Pung YF, Kumar SV, Rajagopalan N, Fry BG, Kumar PP, Kini RM. Ohanin, a  
740 novel protein from king cobra venom: its cDNA and genomic organization. *Gene*  
741 2006; 371: 246-56.

- 742 66. Aird SD. Taxonomic distribution and quantitative analysis of free purine and  
743 pyrimidine nucleosides in snake venoms. *Comp Biochem Physiol B Biochem Mol*  
744 *Biol.* 2005; 140: 109–26.
- 745 67. Dhananjaya BL, D’Souza CJM. The pharmacological role of nucleotidases in  
746 snake venoms. *Cell Biochem Funct* 2010; 28: 171–7.
- 747 68. Gorrell MD, Gysbers V, McCaughan GW. CD26: a multifunctional integral  
748 membrane and secreted protein of activated lymphocytes. *Scand J Immunol.*  
749 2001; 54: 249–64.
- 750 69. Maes M, Scharpé S, Demeester I, Goossens P, Wauters A, Neels H, et al.  
751 Components of biological variation in prolyl endopeptidase and  
752 dipeptidyl-peptidase-iv activity in plasma of healthy subjects. *Clin Chem.* 1994;  
753 40: 1686-91.
- 754 70. Ohkubo I, Huang K, Ochiai Y, Takagaki M, Kani K. Dipeptidyl peptidase IV  
755 from porcine seminal plasma: purification, characterization, and N-terminal amino  
756 acid sequence. *J Biochem.* 1994; 116: 1182-6.
- 757 71. Mollay C, Vilas U, Hutticher A, Kreil G. Isolation of a dipeptidyl aminopeptidase,  
758 a putative processing enzyme, from skin secretion of *Xenopus laevis*. *Eur J*  
759 *Biochem.* 1986; 160: 31–5.
- 760 72. Ogawa Y, Mamura Y, Murayama N, Yanoshita R. Characterization and cDNA  
761 cloning of dipeptidyl peptidase IV from the venom of *Gloydius blomhoffi*  
762 *brevicaudus*. *Comp Biochem Physiol B Biochem Mol Biol.* 2006; 145:  
763 35-42.

- 764 73. Aird SD. Ophidian envenomation strategies and the role of purines. *Toxicon*  
765 2002; 40: 335-393.
- 766 74. Stern R, Jedrzejak MJ. Hyaluronidases: their genomics, structures, and  
767 mechanisms of action. *Chem Rev.* 2006; 106: 818–39.
- 768 75. Toole BP. Hyaluronan: from extracellular glue to pericellular cue. *Nat Rev*  
769 *Cancer.* 2004; 4: 528-39.
- 770 76. Kemparaju K, Girish KS. Snake venom hyaluronidase: a therapeutic target. *Cell*  
771 *Biochem Function.* 2006; 24: 7–12.
- 772 77. Harrison RA, Ibison F, Wilbraham D, Wagstaff SC. Identification of cDNAs  
773 encoding viper venom hyaluronidases: cross-generic sequence conservation of  
774 full-length and unusually short variant transcripts. *Gene* 2007; 392: 22-33.
- 775 78. Castanheira LE, Rodrigues RS, Boldrini-França J, Fonseca FPP, Henrique-Silva  
776 F, Homsí-Brandeburgo MI, Rodrigues VM. Molecular cloning of a hyaluronidase  
777 from *Bothrops pauloensis* venom gland. *J Venom Anim Toxins Incl Trop Dis.*  
778 2014; 20: 25.
- 779 79. Hohn A, Leibrock J, Bailey K, Barde Y-A. Identification and characterization of a  
780 novel member of the nerve growth factor/brain-derived neurotrophic factor  
781 family. *Nature.* 1990; 344: 339-41.
- 782 80. Maisonpierre PC, Belluscio L, Squinto S, Ip NY, Furth ME, Lindsay RM,  
783 Yancopoulos GD. Neurotrophin-3: a neurotrophic factor related to NGF and  
784 BDNF. *Science.* 1990; 247: 1446-51.
- 785 81. Ibanez CF, Ernfors P, Timmusk T, Ip NY, Arenas E, Yancopoulos GD, Persson

- 786 H. Neurotrophin-4 is a target-derived neurotrophic factor for neurons of the  
787 trigeminal ganglion. *Development* 1993; 117: 1345-53.
- 788 82. Wong V, Arriaga R, Ip NY, Lindsay RM. The neurotrophins BDNF, NT-3 and  
789 NT-4/5, but not NGF, up-regulate the cholinergic phenotype of developing motor  
790 neurons. *Eur J Neurosci.* 1993; 5: 466-74.
- 791 83. Kostiza T, Meier J. Nerve growth factors from snake venoms: Chemical  
792 properties, mode of action and biological significance. *Toxicon* 1996; 34: 787–  
793 806.
- 794 84. Trummal K, Tõnismägi K, Paalme V, Järvekülg L, Siigur J, Siigur E. Molecular  
795 diversity of snake venom nerve growth factors. *Toxicon* 2011; 58: 363–8.
- 796 85. Hayashi K, Inoue S, Ikeda K. Purification and characterization of nerve growth  
797 factors (NGFs) from the snake venoms. In: Singh BR and Tu AT editors. *Natural*  
798 *Toxins 2: Structure, Mechanism of Action, and Detection.* 1996; 391: p. 403-16.
- 799 86. Sunagar K, Fry BG, Jackson TNW, Casewell NR, Undheim EAB, Vidal N, Ali  
800 SA, King GF, Vasudevan K, Vasconcelos V, Antunes A. Molecular Evolution of  
801 Vertebrate Neurotrophins: Co-Option of the Highly Conserved Nerve Growth  
802 Factor Gene into the Advanced Snake Venom Arsenal. *Plos ONE* 2013; 8:  
803 e81827
- 804 87. Hargreaves AD, Swain MT, Hegarty MJ, Logan DW, Mulley JF. Restriction and  
805 Recruitment—Gene Duplication and the Origin and Evolution of Snake Venom  
806 Toxins. *Genome Biol. Evol.* 2014; 6: 2088–2095. doi:10.1093/gbe/evu166

- 807 88. Bertaux O, Toselli-Mollereau E, Auffray C, Devignes M-D. Alternative usage of  
808 5' exons in the chicken nerve growth factor gene: refined characterization of a  
809 weakly expressed gene. *Gene* 2004; 334: 83-97.
- 810 89. Ferrara N, Gerber HP, LeCouter J. The biology of VEGF and its receptors. *Nat*  
811 *Med.* 2003; 9: 669-76.
- 812 90. Yamazaki Y, Takani K, Atoda H, Morita T. Snake venom vascular endothelial  
813 growth factors (VEGFs) exhibit potent activity through their specific recognition  
814 of KDR (VEGF receptor 2). *J Biol Chem.* 2003; 278: 51985-8.
- 815 91. Takahashi H, Hattori S, Iwamatsu A, Takizawa H, Shibuya M. A novel snake  
816 venom vascular endothelial growth factor (VEGF) predominantly induces  
817 vascular permeability through preferential signaling via VEGF receptor-1. *J Biol*  
818 *Chem.* 2005; 279: 46304-14.
- 819 92. Yamazaki Y, Matsunaga Y, Tokunaga Y, Obayashi S, Saito M, Morita T. Snake  
820 venom vascular endothelial growth factors (VEGF-Fs) exclusively vary their  
821 structures and functions among species. *J Biol Chem.* 2009; 284: 9885–91.
- 822 93. Guo C, Liu S, Yao Y, Zhang Q, Sun MZ. Past decade study of snake venom  
823 L-amino acid oxidase. *Toxicon* 2012; 60: 302-11.
- 824 94. Kini RM, Gowda TV. Rapid method for separation and purification of four  
825 isoenzymes of phosphodiesterase from *Trimeresurus flavoviridis* (Habu snake)  
826 venom. *J Chromatogr.* 1984; 291: 299-305.

- 827 95. Trummal K, Aaspõllu A, Tõnismägi K, Samel M, Subbi J, Siigur J, Siigur E  
828 Phosphodiesterase from *Vipera lebetina* venom structure and characterization.  
829 Biochimie. 2014; 106, 48-55.
- 830 96. Mamillapalli R, Haimovitz R, Ohad M, Shinitzky M. Enhancement and inhibition  
831 of snake venom phosphodiesterase activity by lysophospholipids. FEBS Letters  
832 1998; 436: 256-258.
- 833 97. Doery HM, Pearson JE. Phospholipase B in snake venoms and bee venom.  
834 Biochem J. 1964; 92: 599-602.
- 835 98. Smith CG, Vane JR. The discovery of captopril. FASEB J. 2003; 17: 788–9.
- 836 99. Camargo AC, Ianzer D, Guerreiro JR, Serrano SM. Bradykinin-potentiating  
837 peptides: beyond captopril. Toxicon 2012; 59: 516-23.
- 838 100. Cotton J, Hayashi MA, Cuniasse P, Vazeux G, Ianzer D, De Camargo AC, Dive  
839 V. Selective inhibition of the C-domain of angiotensin I converting enzyme by  
840 bradykinin potentiating peptides. Biochemistry 2002; 41: 6065–71.
- 841 101. Higuchi S, Murayama N, Saguchi K, Ohi H, Fujita Y, Camargo AC, et al.  
842 Bradykinin-potentiating peptides and C-type natriuretic peptides from snake  
843 venom. Immunopharmacol. 1999; 44: 129-35.
- 844 102. Murayama N, Hayashi MA, Ohi H, Ferreira LA, Fernandes BL, Yamane T,  
845 Camargo ACM. Cloning and sequence analysis of a *Bothrops jararaca* cDNA  
846 encoding a precursor of seven bradykinin-potentiating peptides and a C-type  
847 natriuretic peptide. Proc Natl Acad Sci U S A. 1997; 94: 1189–93.
- 848 103. Wang YM, Huang KF, Tsai IH. Snake venom glutaminyl cyclases: Purification,



849 cloning, kinetic study, recombinant expression, and comparison with the human  
850 enzyme. *Toxicon* 2014; 86: 40-50.

851 104. Calvete JJ, Fasoli E, Sanz L, Boschetti E, Righetti PG. Exploring the venom  
852 proteome of the western diamondback rattlesnake, *Crotalus atrox*, via snake  
853 venomics and combinatorial peptide ligand library approaches. *J Proteome Res*  
854 2009; 8: 3055–3067.

855 105. Aird SD, Yates JR III, Martino PA, Shabanowitz J, Hunt DF, Kaiser II: The  
856 amino acid sequence of the acidic subunit B-chain of crotoxin. *Biochim Biophys*  
857 *Acta* 1990; 1040: 217–224.

858 106. Aird SD, Watanabe Y, Villar-Briones A, Roy MC, Terada K, Mikheyev AS.  
859 Quantitative high-throughput profiling of snake venom gland transcriptomes and  
860 proteomes (*Ovophis okinavensis* and *Protobothrops flavoviridis*). *BMC Genomics*.  
861 2013; 14: 790.

862

863

864 **Supplementary Table S1. Summary of Roche 454 reads and Miseq and Hiseq**  
865 **reads of the *Protobothrops flavoviridis* genome.**

866

867 **Supplementary Table S2. Summary statistics of the Habu genome assembly,**  
868 **HabAm1.**

869

870 **Supplementary Table S3. Comparison of genome sequence assemblies among four**  
871 **snakes.**

872

873 **Supplementary Table S4. RNA-seq analysis of tissues and organs of *Protobothrops***  
874 ***flavoviridis*.**

875

876 **Supplementary Table S5. Keywords used to identify venom-related proteins.**

877

878 **Supplementary Table S6. Best-fit model for estimating the phylogenetic trees.**

879

880 **Supplementary Table S7. Expression profiles of neutrophin family genes in**  
881 ***Protobothrops flavoviridis*.**

882

883 **Supplementary Figures**

884 **Supplementary Figure S1. Genome size estimation based on flow cytometry and**

885 ***k*-mer analysis. a**, Flow cytometry analysis of *Gallus gallus* (blue), *Protobothrops*

886 *flavoviridis* (green), and *Eublepharis macularius* (red). The vertical axis indicates the

887 number of nuclei counted. The horizontal axis indicates fluorescence intensity using an

888 FL2-H filter. Simple linear regression using the two known genome sizes gave a rough

889 estimate of the *P. flavoviridis* genome size at 1.8 Gb. **b**, *k*-mer distribution of whole

890 genome shotgun sequencing reads of *P. flavoviridis* ( $k = 27$ ). The vertical axis indicates

891 the number of *k*-mers. The horizontal axis indicates *k*-mer coverage. Total number of

892 *k*-mers ( $k = 27$ ) was 65,661,771,084. Peak coverage was 43x. The left peak at low

893 frequency ( $< 10x$  depth) likely results from mismatches due to heterozygous SNPs. The

894 genome size was estimated to be 1.41 Gb (total length of used reads / peak coverage).

895

896 **Supplementary Figure S2. Summary and molecular phylogeny of SV and NV**

897 **genes of the hyaluronidase (Hyal) family (a), the Nerve growth factor (NGF)**

898 **family (b), and the L-amino acid oxidase (LAAO) family (c).** Multiple sequence

899 alignments were performed using Clustalw. Phylogenetic trees were constructed with

900 the maximum likelihood method using IQ-TREE (<http://www.iqtree.org>) based on

901 aligned amino acid sequences. Numbers on branches are bootstrap values with 1000x

902 resampling.

903 *Ac*: *Anolis carolinensis*, *Acc*: *Agkistrodon contortrix contortrix*, *Af*: *Azemiops feae*,

904 *Am*: *Alligator mississippiensis*, *Ap*: *Agkistrodon piscivorus*, *Ar*: *Aspidites ramsayi*, *As*:

905 *Alligator sinensis*, Ba: *Bitis arietans*, Bb: *Brachymeles bonita*, Bcc: *Boa constrictor*  
906 *constrictor*, Bco: *Boa constrictor occidentalis*, Ben: *Boa constrictor nebulosa*, Bem:  
907 *Bellatorias major*, Bf: *Bungarus fasciatus*, Bia: *Bitis arietans*, Bj: *Bothrops jararacussu*,  
908 Bm: *Bungarus multicinctus*, Boa: *Bothrops asper*, Bp: *Bothrops pauloensis*, Bt:  
909 *Brachymeles tiboliorum*, Ca: *Crotalus adamanteus*, Car: *Calabaria reinhardtii*, Cc:  
910 *Cerastes cerastes*, Cdc: *Candoia superciliosa crombiei*, Cdt: *Crotalus durissus*  
911 *terrificus*, Ce: *Chilabothrus exsul*, Cg: *Chilabothrus granti*, Ch: *Crotalus horridus*, Cha:  
912 *Chilabothrus angulifer*, Chm: *Chelonia mydas*, Chss: *Chilabothrus strigilatus*  
913 *strigilatus*, Cm: *Chelonia mydas*, Cn: *Cryptophis nigrescens*, Coa: *Corallus annulatus*,  
914 Coc: *Corallus cookii*, Coh: *Corallus hortulanus*, Cor: *Corallus ruschenbergerii*, Cr:  
915 *Calloselasma rhodostoma*, Css: *Candoia superciliosa superciliosa*, Ct: *Cophosaurus*  
916 *texanus*, Cu: *Charina umbratica*, Cym: *Cyclophiops major*, Dc: *Drysdalia coronoides*,  
917 Dd: *Dipsosaurus dorsalis*, Dip: *Ditytophis* sp. AC-2011, Dr: *Daboia russelii*, Dv:  
918 *Demansia vestigiata*, Ea: *Epicrates alvarezi*, Ec: *Epicrates cenchria*, Em: *Eryx muelleri*,  
919 En: *Eunectes notaeus*, Eo: *Echis ocellatus*, Epl: *Echis pyramidum leakeyi*, Et: *Eryx*  
920 *tataricus*, Fp: *Feylinia polylepis*, Gb: *Gloydus blomhoffii*, Gg: *Gallus gallus*, Gh:  
921 *Gloydus halys*, Gi: *Gloydus intermedius*, Gj: *Gekko japonicus*, Gw: *Gambelia*  
922 *wislizenii*, Hs: *Hoplocephalus stephensii*, Lc: *Lepidophyma cuicateca*, Lm: *Lachesis*  
923 *muta*, Lv: *Lacerta viridis*, Mg: *Meleagris gallopavo*, Ml: *Macrovipera lebetina*, Nk:  
924 *Naja kaouthia*, Ns: *Naja sputatrix*, Nss: *Notechis scutatus scutatus*, Oh: *Ophiophagus*  
925 *hannah*, Om: *Oxyuranus microlepidotus*, Oo: *Ovophis okinavensis*, Oss: *Oxyuranus*  
926 *scutellatus scutellatus*, Pa: *Pseudechis australis*, Pb: *Python bivittatus*, Pc: *Phrynosoma*

927 *coronatum*, Pe: *Protobothrops elegans*, Pf: *Protobothrops flavoviridis*, Ph: *Phrynosoma*  
928 *hernandesi*, Phm: *Phalotris mertensi*, Phrm: *Phrynosoma mcallii*, Pm: *Protobothrops*  
929 *mucrosquamatus*, Pn: *Pseudonaja textilis*, Pp: *Pseudechis porphyriacus*, Psa:  
930 *Psammodromus algirus*, Pv: *Pogona vitticeps*, Pyc: *Python curtus*, Sb: *Sceloporus*  
931 *bicanthalis*, Sca: *Struthio camelus australis*, Sct: *Sistrurus tergeminus*, See: *Sistrurus*  
932 *catenatus edwardsi*, Sib: *Simalia boeleni*, Sjb: *Sinomicrurus japonicus boettgeri*, Sjj:  
933 *Sinomicrurus japonicus japonicus*, Sjt: *Sinomicrurus japonicus takarai*, Smi:  
934 *Sinomicrurus macclellandi iwasakii*, Tc: *Tropidechis carinatus*, Tcu: *Tropidophis*  
935 *curtus*, Tel: *Tropidophis greenwayi lanthanus*, Tg: *Trimeresurus gracilis*, Th:  
936 *Takydromus hsuehshanensis*, Ts: *Thamnophis sirtalis*, Tt: *Tropidophis taczanowskyi*,  
937 Uo: *Urosaurus ornatus*, Vu: *Vipera ursinii*, Wa: *Walterinnesia aegyptia*, Xv: *Xantusia*  
938 *vigilis*.

939

940 **Supplementary Figure S3. Summary and molecular phylogeny of the**  
941 **Metalloproteinase (MP) family.** SV genes (a), NV genes (b) and a molecular  
942 phylogeny of SV and NV genes from the metalloproteinase family (c-e). Phylogenetic  
943 trees were constructed with the maximum likelihood method using IQ-TREE  
944 (<http://www.iqtree.org>) based on aligned amino acid sequences. Numbers on branches  
945 are bootstrap values with 1000x resampling.

946 Aam: *Apteryx australis mantelli*, Ac: *Anolis carolinensis*, Acc: *Aquila chrysaetos*  
947 *canadensis*, Acl: *Agkistrodon contortrix laticinctus*, Af: *Aptenodytes forsteri*, Am:  
948 *Alligator mississippiensis*, Ap: *Agkistrodon piscivorus*, Apl: *Agkistrodon piscivorus*

949 *leucostoma*, As: *Alligator sinensis*, Ap: *Anas platyrhynchos*, Ba: *Bothrops atrox*, Bj:  
950 *Bothrops jararaca*, Brs: *Buceros rhinoceros silvestris*, Ca: *Crotalus adamanteus*, Cad:  
951 *Crotalus adamanteus*, Cdd: *Crotalus durissus durissus*, Cdc: *Crotalus durissus*  
952 *collilineatus*, Cg: *Cricetulus griseus*, Ch: *Crotalus horridus*, Cj: *Coturnix japonica*, Cm:  
953 *Chelonia mydas*, Cp: *Crocodylus porosus*, Cpb: *Chrysemys picta*, Cvv: *Crotalus viridis*  
954 *viridis*, Da: *Deinagkistrodon acutus*, Ec: *Echis coloratus*, Gh: *Gloydius halys*, Gi:  
955 *Gloydius intermedius*, Gj: *Gekko japonicus*, Gs: *Gloydius saxatilis*, Ml: *Macrovipera*  
956 *lebetina*, Oh: *Ophiophagus hannah*, Oo: *Ovophis okinavensis*, Pb: *Python bivittatus*, Pc:  
957 *Phalacrocorax carbo*, Pf: *Protobothrops flavoviridis*, Pj: *Protobothrops jerdonii*, Pm:  
958 *Protobothrops mucrosquamatus*, Ps: *Pelodiscus sinensis*, Sct: *Sistrurus tergeminus*,  
959 Sce: *Sistrurus catenatus edwardsi*, Smb: *Sistrurus miliaris barbouri*, Ta: *Trimeresurus*  
960 *albolabris*, Tg: *Trimeresurus gracilis*, Ths: *Thamnophis sirtalis*, Ts: *Thamnophis*  
961 *sirtalis*, Vaa: *Vipera ammodytes ammodytes*.

962

963

964 **Supplementary Figure S4. Summary and molecular phylogeny of the Serine**  
965 **protease (SP) family.**

966 SV genes (a), NV genes (b) and a molecular phylogeny of SV and NV genes of the  
967 serine protease family (c-d). Multiple sequence alignments were performed with  
968 ClustalW. Phylogenetic trees were constructed with the maximum likelihood method  
969 using IQ-TREE (<http://www.iqtree.org>) based on the aligned amino acid sequences.  
970 Numbers on branches are bootstrap values with 1000x resampling.

971 Ac: *Anolis carolinensis*, As: *Alligator sinensis*, Ap: *Anas platyrhynchos*, Bf: *Bungarus*  
972 *fasciatus*, Ca: *Crotalus adamanteus*, Ch: *Crotalus horridus*, Cm: *Chelonia mydas*, Ec:  
973 *Echis coloratus*, Gj: *Gekko japonicus*, Mf: *Micrurus fulvius*, Ml: *Macrovipera lebetina*,  
974 Mr: *Macropisthodon rudis*, Mt: *Micrurus tener*, Ns: *Notechis scutatus*, Oh:  
975 *Ophiophagus hannah*, Oo: *Ovophis okinavensis*, Pa: *Pseudechis australis*, Pb: *Python*  
976 *bivittatus*, Pe: *Protobothrops elegans*, Pf: *Protobothrops flavoviridis*, Pm:  
977 *Protobothrops mucrosquamatus*, Pp: *Pseudechis porphyriacus*, Smb: *Sistrurus*  
978 *miliarius barbouri*, Ts: *Thamnophis sirtalis*.

979

980 **Supplementary Figure S5. Summary and molecular phylogeny of the C-type**  
981 **lection-like protein (CTLP) family.** SV genes (a), NV genes (b) and a molecular  
982 phylogeny of ten SV genes from the C-type lectin-like protein family (c). Multiple  
983 sequence alignments were performed with ClustalW. Phylogenetic trees were  
984 constructed with the maximum likelihood method using IQ-TREE  
985 (<http://www.iqtree.org>) based on the aligned amino acid sequences. Numbers on  
986 branches are bootstrap values with 1000 resampling.

987 Ac: *Anolis carolinensis*, Acc: *Agkistrodon contortrix contortrix*, Ap: *Agkistrodon*  
988 *piscivorus*, Ba: *Bitis arietans*, Bf: *Bungarus flaviceps*, Bj: *Bothrops jararaca*, Ca:  
989 *Crotalus adamanteus*, Ch: *Crotalus horridus*, Cn: *Cryptophis nigrescens*, Coh: *Crotalus*  
990 *oreganus helleri*, Cr: *Calloselasma rhodostoma*, Da: *Deinagkistrodon acutus*, Dv:  
991 *Demansia vestigiata*, Ecs: *Echis carinatus sochureki*, Gb: *Gloydus breviceaudus*, Gh:  
992 *Gloydus halys*, Lm: *Lachesis muta*, Mc: *Micrurus corallinus*, Ml: *Macrovipera*

993 *lebetina*, Mt: *Micrurus tener*, Ns: *Notechis scutatus*, Oh: *Ophiophagus hannah*, Pa:  
994 *Pseudechis australis*, Pb: *Python bivittatus*, Pf: *Protobothrops flavoviridis*, Pj:  
995 *Protobothrops jerdonii*, Pm: *Protobothrops mucrosquamatus*, Pn: *Parasuta nigriceps*,  
996 Pp: *Pseudechis porphyriacus*, Ps: *Pelodiscus sinensis*, Pt: *Pseudonaja textilis*, Sce:  
997 *Sistrurus catenatus edwardsi*, Ta: *Trimeresurus albolabris*, Ts: *Thamnophis sirtalis*

998

999 **Supplementary Figure S6. Summary and molecular phylogeny of the**  
1000 **Phospholipase A<sub>2</sub> (PLA<sub>2</sub>) family.** SV genes (a), NV genes (b) and a molecular  
1001 phylogeny of SV and NV genes of the phospholipase A<sub>2</sub> family (c). Multiple sequence  
1002 alignments were performed using ClustalW. Phylogenetic trees were constructed by  
1003 maximum likelihood method using IQ-TREE (<http://www.iqtree.org>) based on aligned  
1004 amino acid sequences. Numbers on branches are bootstrap values with 1000x  
1005 resampling.

1006 Ac: *Anolis carolinensis*, Acc: *Agkistrodon contortrix contortrix*, Ap: *Agkistrodon*  
1007 *piscivorus*, Ba: *Bitis arietans*, Bas: *Bothrops asper*, Bd: *Bothrops diporus*, Bj: *Bothrops*  
1008 *jararaca*, Bl: *Bothrops leucurus*, Bm: *Bothrops moojeni*, Bs: *Bothriechis schlegelii*, Ca:  
1009 *Crotalus adamanteus*, Cc: *Crotalus cerberus*, Cdt: *Crotalus durissus terrificus*, Cg:  
1010 *Cerrophidion godmani*, Cmn: *Crotalus molossus nigrescens*, Coa: *Crotalus oreganus*  
1011 *abyssus*, Coc: *Crotalus oreganus concolor*, Cpb: *Chrysemys picta bellii*, Cr:  
1012 *Calloselasma rhodostoma*, Css: *Crotalus scutulatus scutulatus*, Gb: *Gloydus*  
1013 *brevicaudus*, Gh: *Gloydus halys*, Gi: *Gloydus intermedius*, Gu: *Gloydus ussuriensis*,  
1014 Lm: *Lachesis muta*, Oh: *Ophiophagus hannah*, Om: *Ovophis makazayazaya*, Oo:



1015 *Ovophis okinavensis*, Pb: *Python bivittatus*, Pe: *Protobothrops elegans*, Pf:  
1016 *Protobothrops flavoviridis*, Pm: *Protobothrops mucrosquamatus*, Scc: *Sistrurus*  
1017 *catenatus catenatus*, Sct: *Sistrurus tergeminus*, Sm: *Sistrurus miliarius* , Smb: *Sistrurus*  
1018 *miliarius barbouri*, Sms: *Sistrurus miliarius streckeri*, Ta: *Trimeresurus albolabris*, Tg:  
1019 *Trimeresurus gracilis*, Ts: *Thamnophis sirtalis*.

1020

1021 **Supplementary Figure S7. Three possible evolutionary scenarios.** Three possible  
1022 evolutionary scenarios to explain the relationship between 2R-WGD and duplication of  
1023 four ohnologs (A, B, C and D) into genes that encode venom proteins (red bars) and  
1024 those that encode non-venom proteins (blue bars). 1R and 2R indicates first and second  
1025 round WGD, respectively. (ABCD), (AB) and (CD) represent ancestral genes. (a) a  
1026 molecular phylogeny showing the diversification occurred randomly in all ohnologs. (b)  
1027 a molecular phylogeny showing the diversification occurred in one of the two ohnologs  
1028 that were produced after the second round of WGD. (c) a molecular phylogeny showing  
1029 only one ohnolog (in this case, ohnolog A) was duplicated to give rise to venom protein  
1030 genes while in the three others, duplication did not involve the development of venom  
1031 protein genes.

1032

1033 **Supplementary Figure S8. Tandem duplications of SV genes.** Seven examples of  
1034 tandem duplications of MP (a), SP (b), and CTLP (c) genes. SV copies and NV copies  
1035 are shown in red and grey arrows, respectively. Sizes of gene clusters are shown on the  
1036 right side.

1037

1038 **Supplementary Figure S9. Five examples of FISH mapping of cDNA clones to**  
1039 **metaphase spreads of *Protobothrops flavoviridis* and *Elaphe quadrivirgata*.**

1040 Arrowheads indicate hybridization signals. TEX14 (b, h), CBX2 (c, i) and AR (d, j)  
1041 genes were mapped to chromosomes 1p, 2q, and a pair of microchromosomes,  
1042 respectively, in *P. flavoviridis* (b, c, d) and *E. quadrivirgata* (h, i, j). Hoechst-stained  
1043 G-banded pattern of the same metaphase chromosomes as in b and h is shown in a and g,  
1044 respectively. While GAD2 genes mapped to Zq in *P. flavoviridis* (e) and Zp in *E.*  
1045 *quadrivirgata* (k), EIF1 genes to Zp in *P. flavoviridis* (f) and Zq in *E. quadrivirgata* (l).  
1046 Arm ratios of Z chromosomes were different between the two species due to a small  
1047 pericentric inversion that occurred in Z chromosomes in the *Elaphe* lineage.

1048

1049 **Supplementary Figure S10. Schematic diagram of the gene structures of the snake**  
1050 **venom metalloproteinases (svMP), HV1, flavorase, VMP-III-like, jerdonitin-like,**  
1051 **HR1a, H2-protease, HR2a, flavoviridin, HR1b, elegantin and NaMP-like.** Red box  
1052 shows the eight core exons (4 to 11) encoding metalloproteinase domains. HHH  
1053 indicate catalytic sites for MP.

1054

1055 **Supplementary Figure S11. Schematic structure of the snake venom serine**  
1056 **protease (svSP) family genes.** Flavoxobin (svSP01, TLf1), TLf2 (svSP02), TLf3  
1057 (svSP03), and svSP04 to svSP11 (a), and a gene structure comparison among  
1058 representative serine proteases (b) are shown. These svSP genes essentially consist of 6

1059 exons, the first of which contains only the 5'non-coding region, except for svSP06  
1060 having additional two exons Ex7 and Ex8, and svSP05 possessing a sub-exon, Ex3b. H,  
1061 D, and S in the boxes indicate the catalytic triad. Arrowheads show the initiation  
1062 codons.

1063

1064 **Supplementary Figure S12. Summary and a phylogenetic tree of the three-finger**  
1065 **toxin (3FTX) family.** SV and NV genes (a) and a molecular phylogeny (b) of the 3FTX  
1066 family. Multiple sequence alignments were performed using ClustalW. Phylogenetic  
1067 trees were constructed with the maximum likelihood method using IQ-TREE  
1068 (<http://www.iqtree.org>) based on aligned amino acid sequences. Numbers on branches  
1069 are bootstrap values with 1000x resampling.

1070 Af: *Azemiops feae*, Ahp: *Ahaetulla prasina*, Am: *Alligator mississippiensis*, Bc:  
1071 *Bungarus candidus*, Bf: *Bungarus flaviceps*, Bi: *Boiga irregularis*, Bm: *Bungarus*  
1072 *multicinctus*, Cm: *Chelonia mydas*, Cpb: *Chrysemys picta bellii*, Dt: *Dispholidus typus*,  
1073 Lm: *Leioheterodon madagascariensis*, Mt: *Micrurus tener*, Nn: *Naja naja*, Oh:  
1074 *Ophiophagus hannah*, Oo: *Ovophis okinavensis*, Pe: *Protobothrops elegans*, Pf:  
1075 *Protobothrops flavoviridis*, Pm: *Protobothrops mucrosquamatus*, Psm: *Psammophis*  
1076 *mossambicus*, Sce: *Sistrurus catenatus edwardsi*, Tb: *Trimorphodon biscutatus*, Td:  
1077 *Telescopus dhara*, Tj: *Thrasops jacksonii*, Ths: *Thamnophis sirtalis*.

1078

1079 **Supplementary Figure S13. Summary and a phylogenetic tree of the**  
1080 **aminopeptidase family.** SV and NV genes (a) and a molecular phylogeny (b) of the

1081 aminopeptidase family. Multiple sequence alignments were performed using ClustalW.  
1082 Phylogenetic trees were constructed with the maximum likelihood method using  
1083 IQ-TREE (<http://www.iqtree.org>) based on aligned amino acid sequences. Numbers on  
1084 branches are bootstrap values with 1000x resampling.

1085 Ac: *Anolis carolinensis*, Br: *Bitis rhinoceros*, Gb: *Gloydus brevicaudus*, Oh:  
1086 *Ophiophagus hannah*, Oo: *Ovophis okinavensis*, Pb: *Python bivittatus*, Pf:  
1087 *Protobothrops flavoviridis*, Pm: *Protobothrops mucrosquamatus*, Ts: *Thamnophis*  
1088 *sirtalis*.

1089

1090 **Supplementary Figure S14. Summary and a phylogenetic tree and structure of the**  
1091 **Cysteine-rich secretory protein (CRISP) family.** SV and NV genes (a) and a  
1092 molecular phylogeny (b) of the CRISP family. Comparison of amino-acid sequences  
1093 between CRISP01 and 02 (c), and CRISP03 and 04 (d). Multiple sequence alignments  
1094 were performed using ClustalW. Phylogenetic trees were constructed with the  
1095 maximum likelihood method using IQ-TREE (<http://www.iqtree.org>) based on aligned  
1096 amino acid sequences. Numbers on branches are bootstrap values with 1000x  
1097 resampling.

1098 Ab: *Agkistrodon blomhoffi*, Ac: *Anolis carolinensis*, Af: *Azemiops feae*, Am: *Alligator*  
1099 *mississippiensis*, An: *Atheris nitschei*, App: *Agkistrodon piscivorus piscivorus*, As:  
1100 *Austrelaps superbus*, Bc: *Bungarus candidus*, Bs: *Bothriechis schlegelii*, Ca: *Crotalus*  
1101 *atrox*, Cg: *Cerrophidion godmani*, Ch: *Crotalus horridus*, Cr: *Causus rhombeatus*, Clr:  
1102 *Calloselasma rhodostoma*, Cv: *Crotalus viridis*, Da: *Deinagkistrodon acutus*, Dr:

1103 *Daboia russellii*, Dt: *Dispholidus typus*, Dv: *Demansia vestigiata*, Ep: *Enhydris*  
1104 *polylepis*, Gi: *Gloydius intermedius*, Hs: *Hoplocephalus stephensii*, Lh: *Lapemis*  
1105 *hardwickii*, Lm: *Leioheterodon madagascariensis*, Lp: *Liophis poecilogyrus*, Ls:  
1106 *Laticauda semifasciata*, Mi: *Micropechis ikaheca*, Na: *Naja atra*, Nk: *Naja kaouthia*,  
1107 Ns: *Notechis scutatus*, Oh: *Ophiophagus hannah*, Om: *Oxyuranus microlepidotus*, Oo:  
1108 *Ovophis okinavensis*, Pa: *Pseudechis australis*, Pb: *Python bivittatus*, Pf: *Protobothrops*  
1109 *flavoviridis*, Pe: *Protobothrops elegans*, Pm: *Protobothrops mucrosquamatus*, Po:  
1110 *Philodryas olfersii*, Pp: *Pseudechis porphyriacus*, Pt: *Pseudonaja textilis*, Rn:  
1111 *Rhinoplocephalus nigrescens*, Rtt: *Rhabdophis tigrinus tigrinus*, Sce: *Sistrurus*  
1112 *catenatus edwardsi*, Sct: *Sistrurus catenatus tergeminus*, Tb: *Trimorphodon biscutatus*,  
1113 Tc: *Tropidechis carinatus*, Td: *Telescopus dhara*, Tg: *Trimeresurus gracilis*, Tj:  
1114 *Trimeresurus jerdonii*, Ts: *Thamnophis sirtalis*., Vb: *Vipera berus*, Vn: *Vipera nikolskii*,  
1115 Vs: *Viridovipera stejnegeri*.

1116

1117 **Supplementary Figure S15. Summary and a phylogenetic tree of the vespryn**  
1118 **family.** SV and NV genes (a) and a molecular phylogeny (b) of the vespryn family.  
1119 Multiple sequence alignments were performed using ClustalW. Phylogenetic trees were  
1120 constructed with the maximum likelihood method using IQ-TREE  
1121 (<http://www.iqtree.org>) based on aligned amino acid sequences. Numbers on branches  
1122 are bootstrap values with 1000x resampling.

1123 Ac: *Anolis carolinensis*, Ca: *Crotalus atrox*, Ch: *Crotalus horridus*, Lm: *Leioheterodon*  
1124 *madagascariensis*, Mi: *Micropechis ikaheca*, Oh: *Ophiophagus hannah*, Pb: *Python*

1125 *bivittatus*, Pf: *Protobothrops flavoviridis*, Pm: *Protobothrops mucrosquamatus*.

1126

1127 **Supplementary Figure S16. Summary and a phylogenetic tree of the**

1128 **5'-nucleotidase family.** SV and NV genes (a) and a molecular phylogeny (b) of the

1129 5'-nucleotidase family. Multiple sequence alignments were performed using ClustalW.

1130 Phylogenetic trees were constructed with the maximum likelihood method using

1131 IQ-TREE (<http://www.iqtree.org>) based on aligned amino acid sequences. Numbers on

1132 branches are bootstrap values with 1000x resampling.

1133 Ac: *Anolis carolinensis*, Oh: *Ophiophagus hannah*, Oo: *Ovophis okinavensis*, Pb:

1134 *Python bivittatus*, Pe: *Protobothrops elegans*, Pf: *Protobothrops flavoviridis*, Pm:

1135 *Protobothrops mucrosquamatus*.

1136

1137 **Supplementary Figure S17. Summary and a phylogenetic tree of the dipeptidyl**

1138 **peptidase (DPP) family.** SV and NV genes (a) and a molecular phylogeny (b) of the

1139 dipeptidyl peptidase family. Multiple sequence alignments were performed using

1140 ClustalW. Phylogenetic trees were constructed with the maximum likelihood method

1141 using IQ-TREE (<http://www.iqtree.org>) based on aligned amino acid sequences.

1142 Numbers on branches are bootstrap values with 1000x resampling.

1143 Ac: *Anolis carolinensis*, Am: *Alligator mississippiensis*, As: *Austrelaps superbus*, Gj:

1144 *Gekko japonicus*, Ns: *Notechis scutatus*, Oh: *Ophiophagus hannah*, Oo: *Ovophis*

1145 *okinavensis*, Pa: *Pseudechis australis*, Pb: *Python bivittatus*, Pe: *Protobothrops elegans*,

1146 Pf: *Protobothrops flavoviridis*, Pm: *Protobothrops mucrosquamatus*, Ts: *Thamnophis*

1147 *sirtalis*.

1148

1149 **Supplementary Figure S18. Summary and a phylogenetic tree of the vascular**  
1150 **endothelial growth factor (VEGF)-like protein family.** SV and NV genes (a) and a  
1151 molecular phylogeny (b) of the VEGF family. Multiple sequence alignments were  
1152 performed using ClustalW. Phylogenetic trees were constructed with the maximum  
1153 likelihood method using IQ-TREE (<http://www.iqtree.org>) based on aligned amino acid  
1154 sequences. Numbers on branches are bootstrap values with 1000x resampling.

1155 *Ac: Anolis carolinensis*, *Ap: Agkistrodon piscivorus*, *App: Agkistrodon piscivorus*  
1156 *piscivorus*, *Ba: Bitis arietans*, *Be: Bothrops erythromelas*, *Bg: Bitis gabonica*, *Bj:*  
1157 *Bothrops jararaca*, *Ca: Crotalus adamanteus*, *Ch: Crotalus horridus*, *Gt: Gloydius*  
1158 *tsushimaensis*, *Mf: Micrurus fulvius*, *Mt: Micrurus tener*, *Oh: Ophiophagus hannah*,  
1159 *Oo: Ovophis okinavensis*, *Pb: Python bivittatus*, *Pe: Protobothrops elegans*, *Pf:*  
1160 *Protobothrops flavoviridis*, *Pm: Protobothrops mucrosquamatus*, *Sce: Sistrurus*  
1161 *catenatus edwardsi*, *Sct: Sistrurus catenatus tergeminuss*, *Smb: Sistrurus miliarius*  
1162 *barbouri*, *Ts: Thamnophis sirtalis*, *Vaa: Vipera ammodytes ammodytes*.

1163

1164 **Supplementary Figure S19. Summary and a phylogenetic tree of the**  
1165 **phosphodiesterase (PDE) family.** SV and NV genes (a) and a molecular phylogeny (b)  
1166 of the PDE family. Multiple sequence alignments were performed using ClustalW.  
1167 Phylogenetic trees were constructed with the maximum likelihood method using  
1168 IQ-TREE (<http://www.iqtree.org>) based on aligned amino acid sequences. Numbers on

1169 branches are bootstrap values with 1000x resampling. A red dot shows the branch point  
1170 between toxic and non-toxic proteins.

1171 *Ac: Anolis carolinensis, Am: Alligator mississippiensis, Ca: Crotalus adamanteus, Ch:*  
1172 *Crotalus horridus, Mf: Micrurus fulvius, Mr: Macropisthodon rudis, Mt: Micrurus*  
1173 *tener, Oo: Ovophis okinavensis, Pb: Python bivittatus, Pe: Protobothrops elegans, Pf:*  
1174 *Protobothrops flavoviridis, Pm: Protobothrops mucrosquamatus, Smb: Sistrurus*  
1175 *miliarius barbouri.*

1176

1177 **Supplementary Figure S20. Summary and a phylogenetic tree of the phospholipase**  
1178 **B (PLB) family.** SV and NV genes (a) and a molecular phylogeny (b) of the PLB  
1179 family. Multiple sequence alignments were performed using ClustalW. Phylogenetic  
1180 trees were constructed with the maximum likelihood method using IQ-TREE  
1181 (<http://www.iqtree.org>) based on aligned amino acid sequences. Numbers on branches  
1182 are bootstrap values with 1000x resampling.

1183 *Ac: Anolis carolinensis, Dc: Drysdalia coronoides, Oh: Ophiophagus hannah, Oo:*  
1184 *Ovophis okinavensis, Pb: Python bivittatus, Pe: Protobothrops elegans, Pf:*  
1185 *Protobothrops flavoviridis, Pm: Protobothrops mucrosquamatus.*

1186

1187 **Supplementary Figure S21. Summary and a phylogenetic tree of the C-type**  
1188 **natriuretic peptide (CNP) family.** SV and NV genes (a) and a molecular phylogeny  
1189 (b) of the CNP family. Multiple sequence alignments were performed using ClustalW.  
1190 Phylogenetic trees were constructed with the maximum likelihood method using



1191 IQ-TREE (<http://www.iqtree.org>) based on aligned amino acid sequences. Numbers on  
1192 branches are bootstrap values with 1000x resampling.

1193 Ac: *Anolis carolinensis*, Acc: *Agkistrodon contortrix contortrix*, Am: *Alligator*  
1194 *mississippiensis*, Ap: *Agkistrodon piscivorus*, As: *Alligator sinensis*, Ba: *Bitis arietans*,  
1195 Bi: *Boiga irregularis*, Bj: *Bothrops jararaca*, Bp: *Bothrops pauloensis*, Ca: *Crotalus*  
1196 *adamanteus*, Cc: *Cerastes cerastes*, Ch: *Crotalus horridus*, Cm: *Chelonia mydas*, Cr:  
1197 *Calloselasma rhodostoma*, Dr: *Daboia russelii*, Eo: *Echis ocellatus*, Epl: *Echis*  
1198 *pyramidum leakeyi*, Gb: *Gloydius blomhoffii*, Gg: *Gallus gallus*, Gh: *Gloydius halys*,  
1199 Gi: *Gloydius intermedius*, Gj: *Gekko japonicus*, Lm: *Lachesis muta*, Mg: *Meleagris*  
1200 *gallopavo*, Ml: *Macrovipera lebetina*, Oh: *Ophiophagus hannah*, Oo: *Ovophis*  
1201 *okinavensis*, Pb: *Python bivittatus*, Pc: *Protobothrops elegans*, Pf: *Protobothrops*  
1202 *flavoviridis*, Phm: *Phalotris mertensi*, Pm: *Protobothrops mucrosquamatus*, Sca:  
1203 *Struthio camelus australis*, Sct: *Sistrurus tergeminus*, Smb: *Sistrurus miliarius barbouri*,  
1204 Tg: *Trimeresurus gracilis*, Ts: *Thamnophis sirtalis*.

1205

1206 **Supplementary Figure S22. Summary and a phylogenetic tree of the glutaminyl**  
1207 **peptide cyclotransferase (GPCase) family.** SV and NV genes (a) and a molecular  
1208 phylogeny (b) of the GPCase family. Multiple sequence alignments were performed  
1209 using ClustalW. Phylogenetic trees were constructed with the maximum likelihood  
1210 method using IQ-TREE (<http://www.iqtree.org>) based on aligned amino acid sequences.  
1211 Numbers on branches are bootstrap values with 1000x resampling.

1212 Ac: *Anolis carolinensis*, Bd: *Bothrops diporus*, Bi: *Boiga irregularis*, Bj: *Bothrops*

- 1213 *jararaca*, Cg: *Cerrophidion godmani*, Cpb: *Chrysemys picta bellii*, Dr: *Daboia russelii*,  
1214 Gj: *Gekko japonicus*, Mf: *Micrurus fulvius*, Oo: *Ovophis okinavensis*, Pb: *Python*  
1215 *bivittatus*, Pe: *Protobothrops elegans*, Pf: *Protobothrops flavoviridis*, Pm:  
1216 *Protobothrops mucrosquamatus*. Sct: *Sistrurus catenatus tergeminus*, Tg: *Trimeresurus*  
1217 *gracilis*, Ts: *Thamnophis sirtalis*.
- 1218
- 1219

# Supplementary Figure S1.

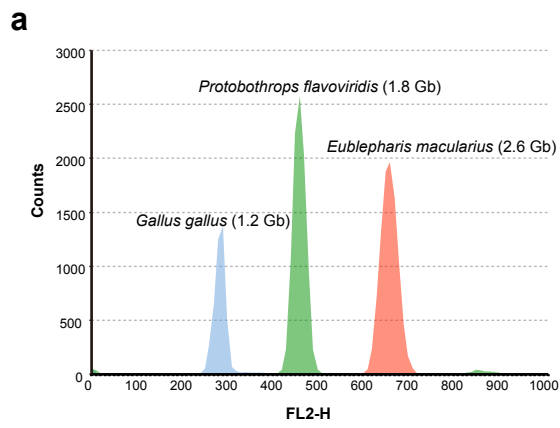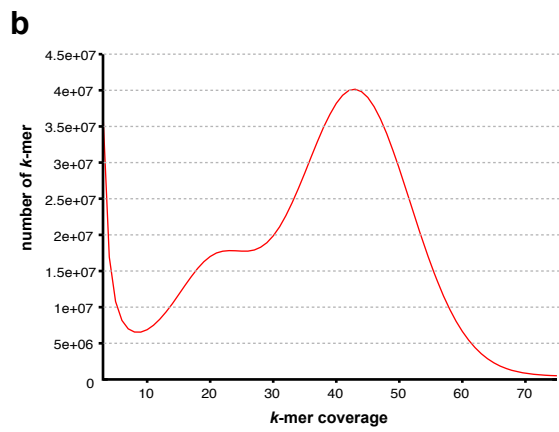

Supplementary Fig. S2.

**(a) Hyaluronidase (Hyal)**  
**Member of the family**

| Gene            | Name                     | Locus                                      | Gene model ID      | Transcripts                |
|-----------------|--------------------------|--------------------------------------------|--------------------|----------------------------|
| Hyal01 (svHyal) | svHyaluronidase (svHYAL) | habu1_scaffold7188 : 185477 ... 226495 : - | habu1_s7188_g17820 | pb016481_c260499_f1p0_1519 |
| Hyal02 (nvHyal) | hyaluronidase-1 (HYAL1)  | habu1_scaffold2564 : 518042 ... 530062 : + | habu1_s2564_g09254 | habu1_s2564_g09254.t1      |
| Hyal03 (nvHyal) | hyaluronidase-2 (HYAL2)  | habu1_scaffold2564 : 478562 ... 496616 : + | habu1_s2564_g09252 | habu1_s2564_g09252.t1      |
| Hyal04 (nvHyal) | hyaluronidase-2 (HYAL2)  | habu1_scaffold6849 : 149616 ... 194647 : + | habu1_s6849_g17560 | habu1_s6849_g17560.t1      |
| Hyal05 (nvHyal) | hyaluronidase-3 (HYAL3)  | habu1_scaffold2564 : 546642 ... 569966 : + | habu1_s2564_g09256 | habu1_s2564_g09256.t1      |
| Hyal06 (nvHyal) | hyaluronidase-4 (HYAL4)  | habu1_scaffold7188 : 99577 ... 184945 : -  | habu1_s7188_g17819 | habu1_s7188_g17819.t1      |

**Molecular phylogeny of members**

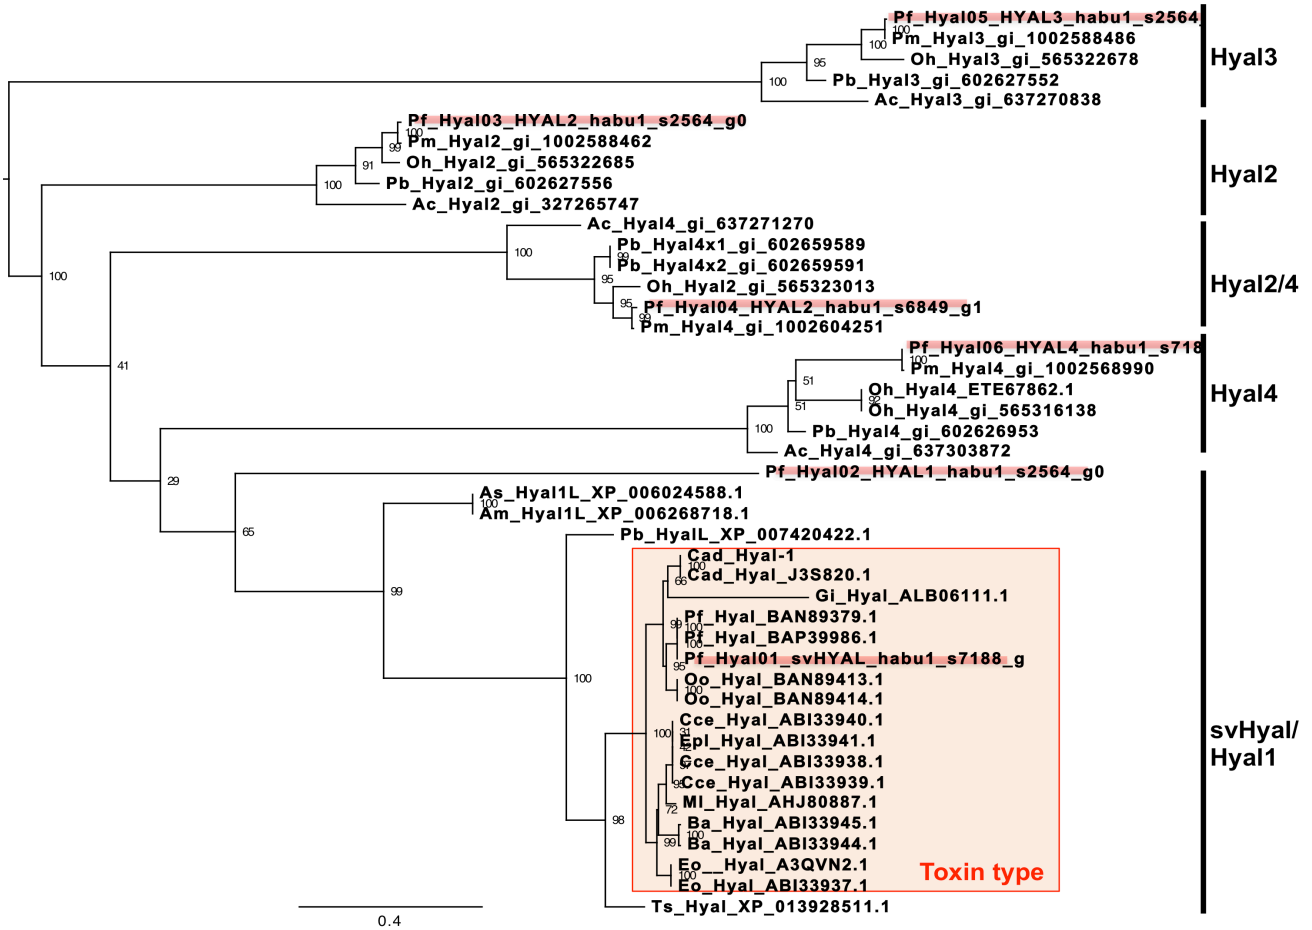

Fig. S2 continued.

**(b) Nerve growth factor (NGF)**  
**Member of the family**

| Gene          | Name                   | Locus                                      | Gene model ID      | Transcripts                |
|---------------|------------------------|--------------------------------------------|--------------------|----------------------------|
| Neu01 (svNeu) | svNGF                  | habu1_scaffold3536 : 227336 ... 309758 : + | habu1_s3536_g11975 | pb016481_c100488_f2p5_1112 |
| Neu02 (nvNeu) | BDNF                   | habu1_scaffold3803 : 208016 ... 266737 : + | habu1_s3803_g12736 | habu1_s3803_g12736.t1      |
| Neu03 (nvNeu) | neurotrophin-3 isoform | habu1_scaffold105 : 263936 ... 278118 : +  | habu1_s105_g00548  | habu1_s105_g00548.t1       |
| Neu04 (nvNeu) | neurotrophin-4 isoform | habu1_scaffold6123 : 46517 ... 70395 : -   | habu1_s6123_g16797 | habu1_s6123_g16797.t1      |

**Molecular phylogeny of members**

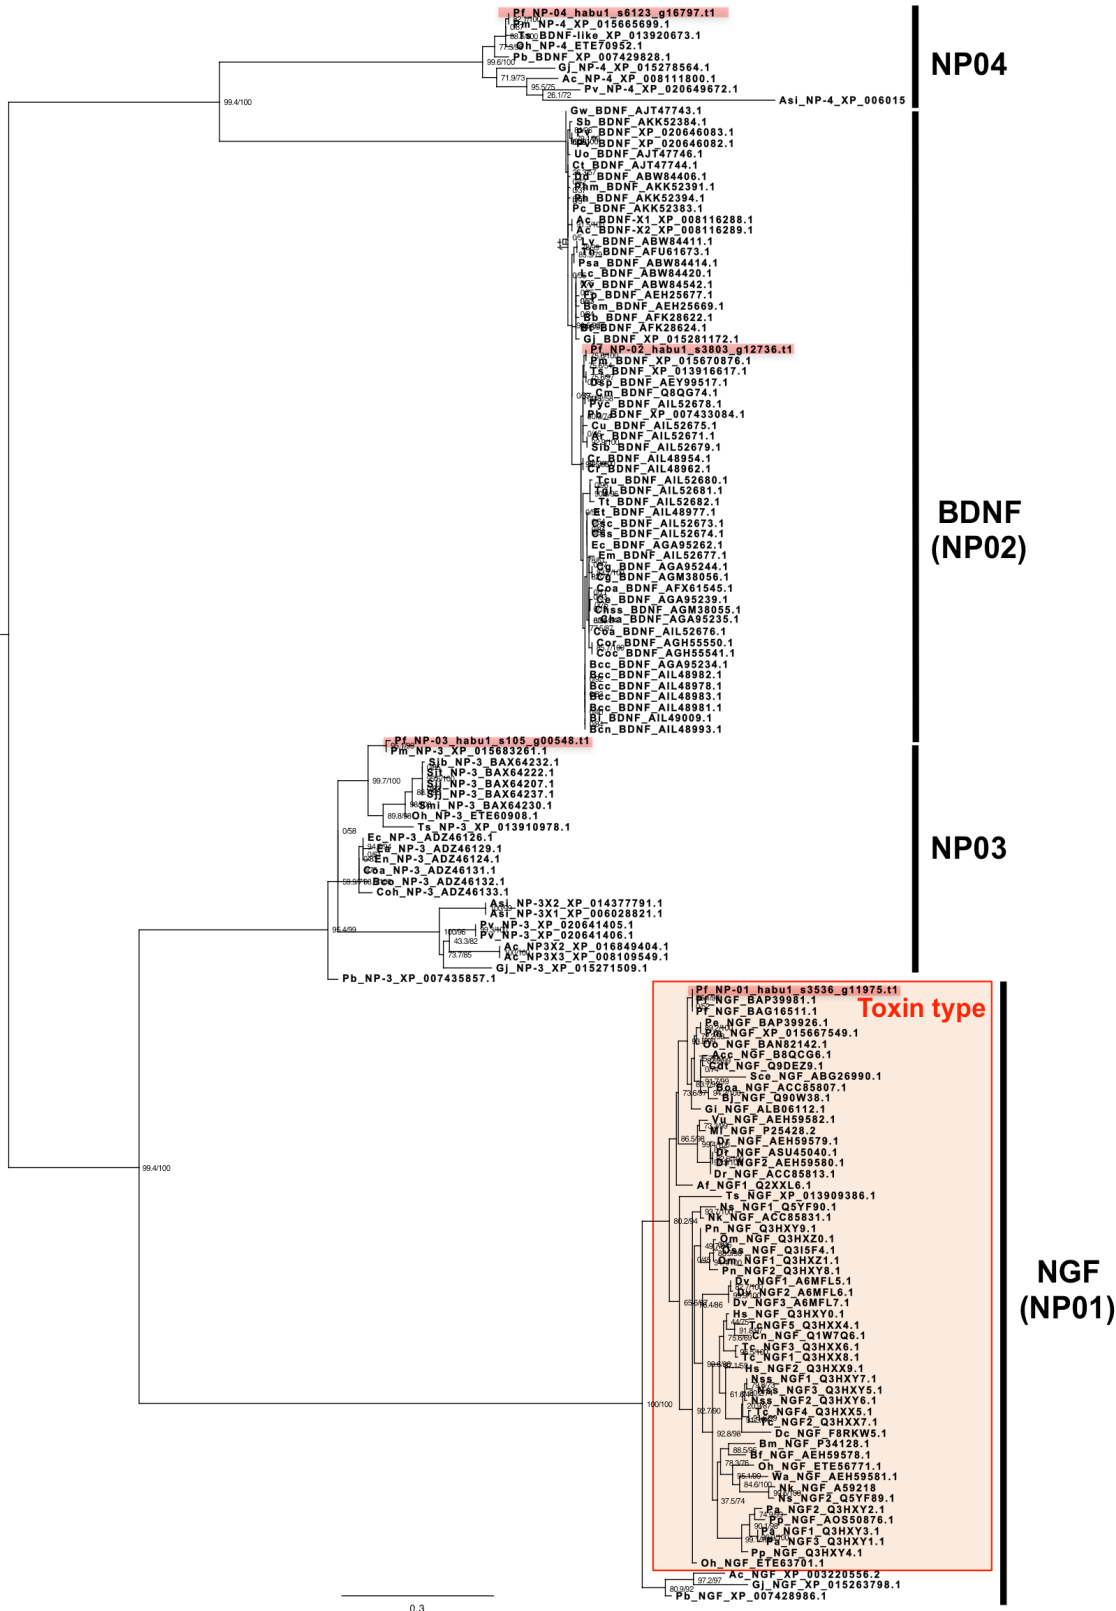



**(a) SV genes**

| Gene   | Name                                         | Locus                                                                                                                                           | Gene model ID         | Transcripts                  |
|--------|----------------------------------------------|-------------------------------------------------------------------------------------------------------------------------------------------------|-----------------------|------------------------------|
| svMP01 | HV1, Vascular apoptosis-inducing protein     | habu1_scaffold2862: 139192-161910: +                                                                                                            | habu1_s2862_g10314a   | pb016480_c42639_f26p8_2346   |
| svMP02 | flavorase                                    | habu1_scaffold2862: 165955-186529: +                                                                                                            | habu1_s2862_g10314b   | pb016480_c42674_f12p2_2354   |
| svMP03 | VMP-III-like                                 | habu1_scaffold2862: 188915-209119: +,<br>habu1_scaffold14911: 159118-22474: +                                                                   | habu1_s2862_g10314c   | pb016481_c551930_f88p36_2337 |
| svMP04 | jerdonitin-like                              | habu1_scaffold3258: 1...15093: +,<br>habu1_scaffold415864: 1...818: -,<br>habu1_scaffold191139: 1...797: -,<br>habu1_scaffold403873: 1...701: - | habu1_s3258_g11210    | pb016481_c222387_f3p5_2004   |
| svMP05 | HR1a                                         | habu1_scaffold3258: 15841-52645: +                                                                                                              | habu1_s3258_g11211    | pb016480_c115296_f1p1_2355   |
| svMP06 | H2 metalloproteinase (metalloprotease P-lia) | habu1_scaffold14911: 2022...5557: +                                                                                                             | habu1_s14911_g21429   | pb016481_c225249_f1p9_1815   |
| svMP07 | HR2a                                         | habu1_scaffold14911: 60789...76673: +<br>habu1_scaffold14911: 1...21550: +                                                                      | habu1_s14911_g21430a  | pb016480_c226_f26p9_2010     |
| svMP08 | flavoridin                                   | habu1_scaffold14911: 3733...53141: +                                                                                                            | habu1_s14911_g21430b  | pb016480_c222_f46p26_1997    |
| svMP09 | HR1b                                         | habu1_scaffold399953: 20785...36711: -                                                                                                          | habu1_s399953_g24864a | pb016481_c917376_f5p9_2037   |
| svMP10 | Mt-b/ elegantin-like                         | habu1_scaffold399953: 1...38225: -<br>habu1_scaffold410279: 1...747: -<br>habu1_scaffold408733: 1...51: -<br>habu1_scaffold412967: 1...795: -   | habu1_s399953_g24864b | pb016481_c16287_f13p13_2020  |
| svMP11 | NaMP                                         | habu1_scaffold2862: 106532...130000+                                                                                                            | habu1_s2862_g10314d   | habu1_s2862_g10314.t2        |

**(b) NV genes**

| Gene   | Name                                      | Locus                                                                                                                                                                                            | Gene model ID                                                      | Transcripts             |
|--------|-------------------------------------------|--------------------------------------------------------------------------------------------------------------------------------------------------------------------------------------------------|--------------------------------------------------------------------|-------------------------|
| nvMP01 | ADAM8/9-like                              | habu1_scaffold2: 71286 ... 110080: +                                                                                                                                                             | habu1_s2_g00003                                                    | habu1_s2_g00003.t1      |
| nvMP02 | ADAM9                                     | habu1_scaffold179838: 1 ... 914: +                                                                                                                                                               | habu1_s179838_g24144                                               | habu1_s179838_g24144.t1 |
| nvMP03 | ADAM 9                                    | habu1_scaffold2858: 1807398 ... 1833873: +                                                                                                                                                       | habu1_s2858_g10274                                                 | habu1_s2858_g10274.t1   |
| nvMP04 | ADAM 10-like                              | habu1_scaffold2336: 1112623...1112538: -,<br>habu1_scaffold4524: 1 ... 13872: +,<br>habu1_scaffold333519: 1 ... 395: -,<br>habu1_scaffold2934: 1 ... 18140: +,<br>habu1_scaffold244794: 1...917- | habu1_s4524_g14387/<br>habu1_s333519_g24419/<br>habu1_s2934_g10526 | habu1_s2934_g10526.t1   |
| nvMP05 | ADAM10                                    | habu1_scaffold878: 135568 ... 161715: -                                                                                                                                                          | habu1_s878_g03107                                                  | habu1_s878_g03107.t1    |
| nvMP06 | ADAM11                                    | habu1_scaffold2140: 97648 ... 117201: -                                                                                                                                                          | habu1_s2140_g07747                                                 | habu1_s2140_g07747.t1   |
| nvMP07 | ADAM11                                    | habu1_scaffold5075: 1 ... 61735: -                                                                                                                                                               | habu1_s5075_g15185                                                 | habu1_s5075_g15185.t1   |
| nvMP08 | ADAM 12                                   | habu1_scaffold2690: 97936 ... 361842: +                                                                                                                                                          | habu1_s2690_g09595                                                 | habu1_s2690_g09595.t1   |
| nvMP09 | ADAM 15                                   | habu1_scaffold5687: 27897 ... 62375: -                                                                                                                                                           | habu1_s5687_g16173                                                 | habu1_s5687_g16173.t1   |
| nvMP10 | ADAM 17                                   | habu1_scaffold602: 44893 ... 82435: -                                                                                                                                                            | habu1_s602_g02843                                                  | habu1_s602_g02843.t1    |
| nvMP11 | ADAM 19                                   | habu1_scaffold5506: 105086 ... 193255: -                                                                                                                                                         | habu1_s5506_g15874                                                 | habu1_s5506_g15874.t1   |
| nvMP12 | ADAM 20                                   | (habu1_scaffold8405: 494795...504794: +)                                                                                                                                                         |                                                                    |                         |
| nvMP13 | ADAM21                                    | habu1_scaffold399842: 646178 ... 651147: +                                                                                                                                                       | habu1_s399842_g24578                                               | habu1_s399842_g24578.t1 |
| nvMP14 | ADAM 22                                   | habu1_scaffold4012: 359513 ... 383057: -                                                                                                                                                         | habu1_s4012_g13214                                                 | habu1_s4012_g13214.t1   |
| nvMP15 | ADAM 32                                   | habu1_scaffold2858: 1837688 ... 1857057: +                                                                                                                                                       | habu1_s2858_g10275                                                 | habu1_s2858_g10275.t1   |
| nvMP16 | ADAM 33                                   | habu1_scaffold3839: 5573 ... 17043: -                                                                                                                                                            | habu1_s3839_g12793                                                 | habu1_s3839_g12793.t1   |
| nvMP17 | ADAM 33                                   | habu1_scaffold44599: 1 ... 27737: +                                                                                                                                                              | habu1_s44599_g23329                                                | habu1_s44599_g23329.t1  |
| nvMP18 | ADAMTS-like                               | habu1_scaffold5048: 540792 ... 774172: -                                                                                                                                                         | habu1_s5048_g15167                                                 | habu1_s5048_g15167.t1   |
| nvMP19 | ADAMTS1                                   | habu1_scaffold2614: 247016 ... 269192: +                                                                                                                                                         | habu1_s2614_g09476                                                 | habu1_s2614_g09476.t1   |
| nvMP20 | ADAMTS 2                                  | habu1_scaffold5378: 27996 ... 91121: +                                                                                                                                                           | habu1_s5378_g15691                                                 | habu1_s5378_g15691.t1   |
| nvMP21 | ADAMTS2                                   | habu1_scaffold4909: 1 ... 71717: +                                                                                                                                                               | habu1_s4909_g14946                                                 | habu1_s4909_g14946.t1   |
| nvMP22 | ADAMTS2                                   | habu1_scaffold4909: 72026 ... 141808: +                                                                                                                                                          | habu1_s4909_g14947                                                 | habu1_s4909_g14947.t1   |
| nvMP23 | ADAMTS 3                                  | habu1_scaffold3496: 105170 ... 245955: -                                                                                                                                                         | habu1_s3496_g11873                                                 | habu1_s3496_g11873.t1   |
| nvMP24 | ADAMTS3                                   | habu1_scaffold2091: 29366 ... 227749: +                                                                                                                                                          | habu1_s2091_g07645                                                 | habu1_s2091_g07645.t1   |
| nvMP25 | ADAMTS 4-like                             | habu1_scaffold2369: 17219 ... 58128: -                                                                                                                                                           | habu1_s2369_g08591                                                 | habu1_s2369_g08591.t1   |
| nvMP26 | ADAMTS4                                   | habu1_scaffold121: 92416 ... 110788: +                                                                                                                                                           | habu1_s121_g00604                                                  | habu1_s121_g00604.t1    |
| nvMP27 | ADAMTS5-like                              | habu1_scaffold6969: 1...5593: +,<br>habu1_scaffold6970: 1 ... 21977: +                                                                                                                           | habu1_s6970_g17669                                                 | habu1_s6970_g17669.t1   |
| nvMP28 | ADAMTS5                                   | habu1_scaffold2614: 187286 ... 229869: +                                                                                                                                                         | habu1_s2614_g09475                                                 | habu1_s2614_g09475.t1   |
| nvMP29 | ADAMTS6                                   | habu1_scaffold16578: 176146 ... 270945: -                                                                                                                                                        | habu1_s16578_g21764                                                | habu1_s16578_g21764.t1  |
| nvMP30 | ADAMTS7                                   | habu1_scaffold1390: 1630741 ... 1657463: -                                                                                                                                                       | habu1_s1390_g05010                                                 | habu1_s1390_g05010.t1   |
| nvMP31 | ADAMTS 8                                  | habu1_scaffold2647: 240949 ... 299435: -                                                                                                                                                         | habu1_s2647_g09516                                                 | habu1_s2647_g09516.t1   |
| nvMP32 | ADAMTS9                                   | habu1_scaffold523: 106186 ... 238219: +                                                                                                                                                          | habu1_s523_g02405                                                  | habu1_s523_g02405.t1    |
| nvMP33 | ADAMTS9-like                              | habu1_scaffold524: 46586 ... 55632: +                                                                                                                                                            | habu1_s524_g02406                                                  | habu1_s524_g02406.t1    |
| nvMP34 | ADAMTS10                                  | habu1_scaffold2275: 129686 ... 195770: +                                                                                                                                                         | habu1_s2275_g08137                                                 | habu1_s2275_g08137.t1   |
| nvMP35 | ADAMTS12-like                             | habu1_scaffold2255: 1335208 ... 1356653: -                                                                                                                                                       | habu1_s2255_g08060                                                 | habu1_s2255_g08060.t1   |
| nvMP36 | ADAMTS12                                  | habu1_scaffold2256: 1 ... 12075: -                                                                                                                                                               | habu1_s2256_g08061                                                 | habu1_s2256_g08061.t1   |
| nvMP37 | ADAMTS13                                  | habu1_scaffold1917: 171206 ... 197845: -                                                                                                                                                         | habu1_s1917_g07045                                                 | habu1_s1917_g07045.t1   |
| nvMP38 | ADAMTS14                                  | habu1_scaffold5729: 315496 ... 387476: +                                                                                                                                                         | habu1_s5729_g16218                                                 | habu1_s5729_g16218.t1   |
| nvMP39 | ADAMTS15                                  | habu1_scaffold2647: 327316 ... 360932: +                                                                                                                                                         | habu1_s2647_g09517                                                 | habu1_s2647_g09517.t1   |
| nvMP40 | ADAMTS16                                  | habu1_scaffold17754: 22336 ... 103527: +                                                                                                                                                         | habu1_s17754_g21974                                                | habu1_s17754_g21974.t1  |
| nvMP41 | ADAMTS17                                  | habu1_scaffold215: 1777532 ... 1900885: +                                                                                                                                                        | habu1_s215_g01205                                                  | habu1_s215_g01205.t1    |
| nvMP42 | ADAMTS18                                  | habu1_scaffold496: 265045 ... 629934: -                                                                                                                                                          | habu1_s496_g02284                                                  | habu1_s496_g02284.t1    |
| nvMP43 | ADAMTS19                                  | habu1_scaffold83: 129465 ... 215485: -                                                                                                                                                           | habu1_s83_g00469                                                   | habu1_s83_g00469.t1     |
| nvMP44 | MMP-14                                    | habu1_scaffold2519: 40687 ... 63855: -                                                                                                                                                           | habu1_s2519_g09165                                                 | habu1_s2519_g09165.t1   |
| nvMP45 | MMP-15                                    | habu1_scaffold2277: 991963 ... 999434: +                                                                                                                                                         | habu1_s2277_g08190                                                 | habu1_s2277_g08190.t1   |
| nvMP46 | MMP-16                                    | habu1_scaffold2447: 249336 ... 445542: +                                                                                                                                                         | habu1_s2447_g08959                                                 | habu1_s2447_g08959.t1   |
| nvMP47 | MMP-17                                    | habu1_scaffold2313: 1036 ... 67938: +                                                                                                                                                            | habu1_s2313_g08399                                                 | habu1_s2313_g08399.t1   |
| nvMP48 | MMP-17                                    | habu1_scaffold1466: 578466 ... 598489: -                                                                                                                                                         | habu1_s1466_g05412                                                 | habu1_s1466_g05412.t1   |
| nvMP49 | MMP-19                                    | habu1_scaffold402967: 95446 ... 134769: +                                                                                                                                                        | habu1_s402967_g25016                                               | habu1_s402967_g25016.t1 |
| nvMP50 | MMP-20                                    | habu1_scaffold532: 778467 ... 796669: -                                                                                                                                                          | habu1_s532_g02441                                                  | habu1_s532_g02441.t1    |
| nvMP51 | MMP-24                                    | habu1_scaffold4809: 306319 ... 347795: -                                                                                                                                                         | habu1_s4809_g14788                                                 | habu1_s4809_g14788.t1   |
| nvMP52 | MMP-25                                    | habu1_scaffold9747: 1 ... 14152: +                                                                                                                                                               | habu1_s9747_g19608                                                 | habu1_s9747_g19608.t1   |
| nvMP53 | MMP-25                                    | habu1_scaffold21648: 40170 ... 53088: -                                                                                                                                                          | habu1_s21648_g22429                                                | habu1_s21648_g22429.t1  |
| nvMP54 | MMP-28                                    | habu1_scaffold1501: 177931 ... 192935: -                                                                                                                                                         | habu1_s1501_g05556                                                 | habu1_s1501_g05556.t1   |
| nvMP55 | ATP-dependent zinc metalloprotease YME1L1 | habu1_scaffold403007: 90596 ... 121556: +                                                                                                                                                        | habu1_s403007_g25105                                               | habu1_s403007_g25105.t1 |
| nvMP56 | Metalloprotease TIKI2                     | habu1_scaffold13164: 180021 ... 242825: -                                                                                                                                                        | habu1_s13164_g20985                                                | habu1_s13164_g20985.t1  |
| nvMP57 | MPTypIII-1                                | habu1_scaffold2862: 26906...90317: +                                                                                                                                                             | habu1_s2862_g10314e                                                | habu1_s2862_g10314.t1   |

(c)

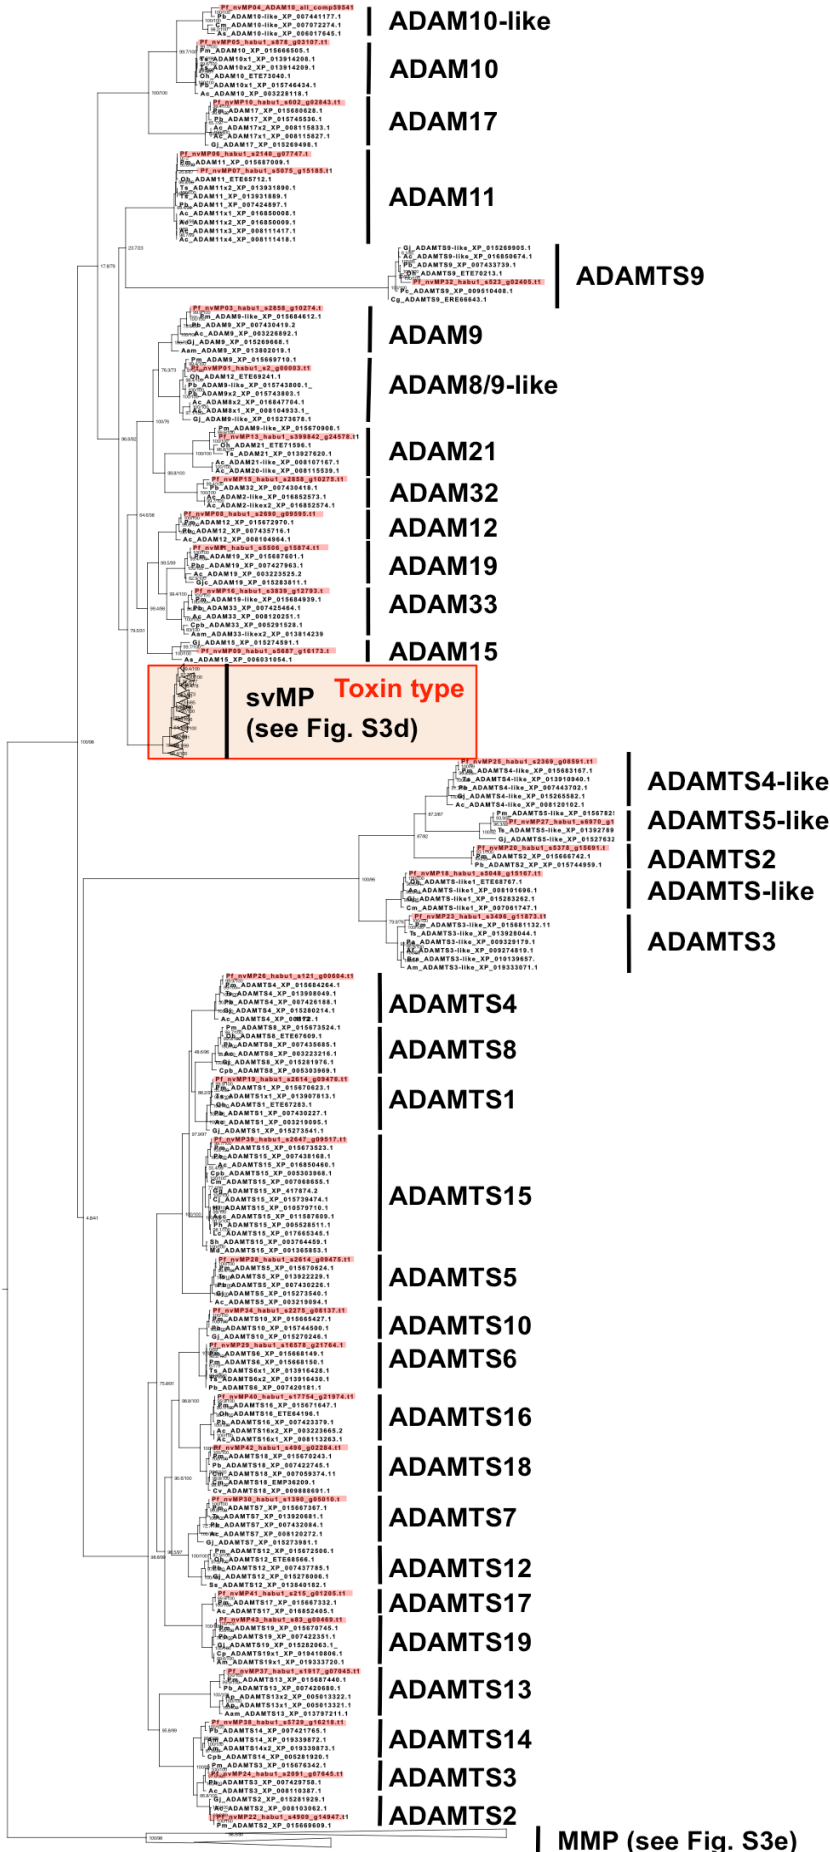



(d)

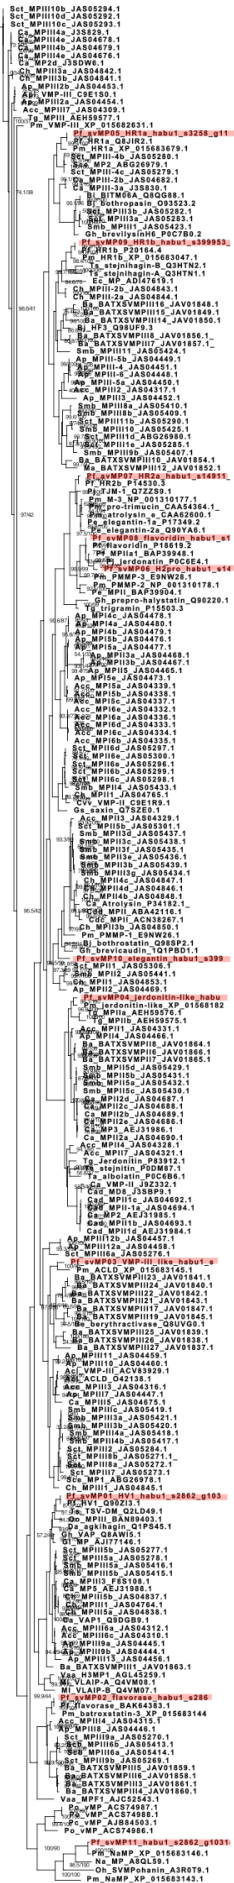

MPIII

svMP05 (HR1a)

svMP09 (HR1b)

svMP07 (HR2a)

svMP06/08  
(flavoridin/H2protease)

MPI

MPII

svMP10 (elegantin-like)

svMP04 (jerdonitin-like)

svMP03 (VMPiII-like)

MPIII

svMP01 (HV1)

svMP02 (flavorase)

svMP11 (NaMP)

(e)

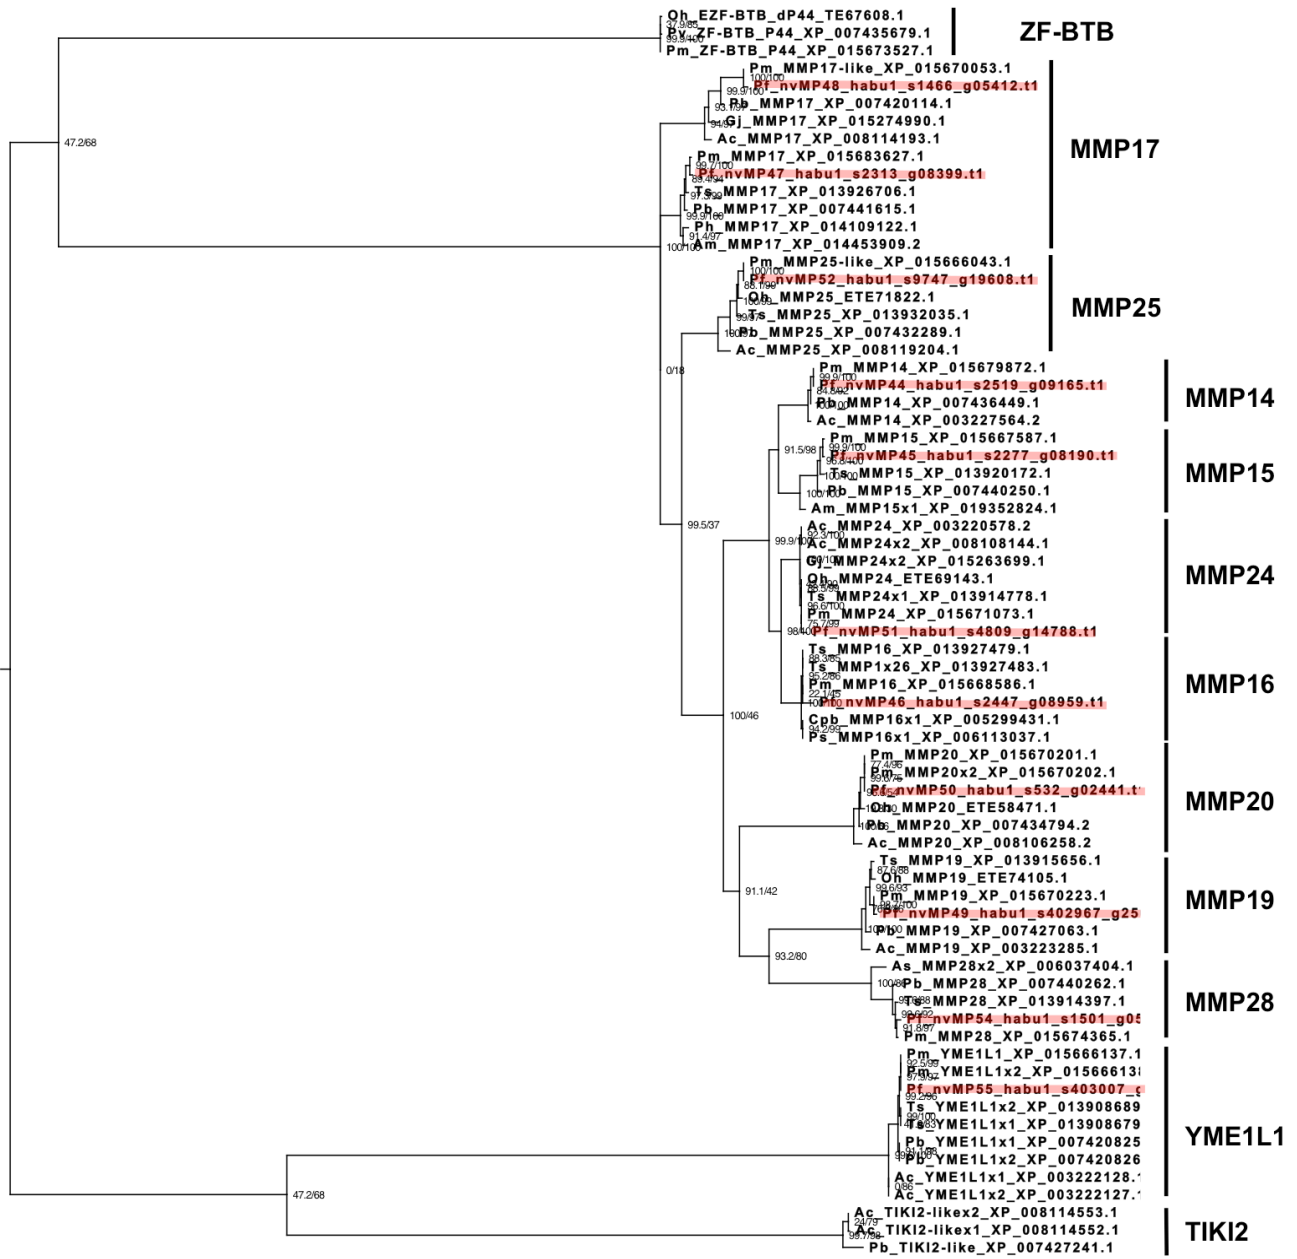

3.0

Supplementary Figure S4.

**(a) SV genes**

| Gene   | Name                       | Locus                                                                                                                                                                              | Gene model ID       | Transcripts                   |
|--------|----------------------------|------------------------------------------------------------------------------------------------------------------------------------------------------------------------------------|---------------------|-------------------------------|
| svSP01 | TLf1/flavoxobin            | habu1_scaffold7597 : 107550 ... 117068 : -                                                                                                                                         | habu1_s7597_g18190a | pb016481_c628_f19p22_1897     |
| svSP02 | TLf2                       | habu1_scaffold409039:463...626: -<br>habu1_scaffold189200:1..2644: +<br>habu1_scaffold142871:1..912: +                                                                             |                     | pb016481_c385685_f143p90_3720 |
| svSP03 | TLf3                       | habu1_scaffold7597 : 146701 ... 152624 : -                                                                                                                                         | habu1_s7597_g18190b | pb016481_c663_f11p12_1578     |
| svSP04 |                            | habu1_scaffold6789 : 134126 ... 143039 : +                                                                                                                                         | habu1_s6789_g17480  | pb016480_c50972_f1p2_1888     |
| svSP05 |                            | habu1_scaffold6789: 168298...179481: +                                                                                                                                             | habu1_s6789_g17481a | pb016481_c237569_f1p19_1959   |
| svSP06 |                            | habu1_scaffold4106 : 1768 ... 14932 : +,<br>habu1_scaffold375860:1..711: +,<br>habu1_scaffold50513:1..3838: +,<br>habu1_scaffold73303:1..843: +,<br>habu1_scaffold270900:1..692: + | habu1_s4106_g13431a | pb016481_c782298_f2p3_6239    |
| svSP07 |                            | habu1_scaffold4106 : 20911 ... 28186: +                                                                                                                                            | habu1_s4106_g13431b | pb016481_c395211_f1p12_2348   |
| svSP08 |                            | habu1_scaffold6789 : 187000 ... 207128 : +                                                                                                                                         | habu1_s6789_g17481b | pb016481_c1327_f9p6_1578      |
| svSP09 |                            | habu1_scaffold7597 : 96885 ... 155905 : -                                                                                                                                          | habu1_s7597_g18190c | pb016481_c243922_f1p5_2691    |
| svSP10 |                            | habu1_scaffold4106 : 28886 ... 46059 : +                                                                                                                                           | habu1_s4106_g13432  | pb016481_c944_f4p2_1299       |
| svSP11 | Jerdonobin-II like, GPV-PA | habu1_scaffold22023 : 12371 ... 34705 : -                                                                                                                                          | habu1_s22023_g22469 | pb016481_c591372_f1p3_1420    |

**(b) NV genes**

| Gene   | Name                                                  | Locus                                                                                     | Gene Model ID        | Transcripts             |
|--------|-------------------------------------------------------|-------------------------------------------------------------------------------------------|----------------------|-------------------------|
| nvSP01 | anionic trypsin-like                                  | habu1_scaffold2510 : 115346 ... 122903 : +                                                | habu1_s2510_g09123   | habu1_s2510_g09123.t1   |
| nvSP02 | anionic trypsin-2-like                                | habu1_scaffold2510 : 78736 ... 98860 : +                                                  | habu1_s2510_g09122   | habu1_s2510_g09122.t1   |
| nvSP03 | trypsin I-P38-like                                    | habu1_scaffold2510 : 68775 ... 74705 : -                                                  | habu1_s2510_g09121   | habu1_s2510_g09121.t1   |
| nvSP04 | kallikrein-14-like                                    | habu1_scaffold9123 : 219136 ... 242356 : +                                                | habu1_s9123_g19184   | habu1_s9123_g19184.t1   |
| nvSP05 | trypsin-like                                          | habu1_scaffold9123 : 194396 ... 219087 : +                                                | habu1_s9123_g19183   | habu1_s9123_g19183.t1   |
| nvSP06 | chymotrypsin-C                                        | habu1_scaffold9572 : 83215 ... 86125 : -                                                  | habu1_s9572_g19445   | habu1_s9572_g19445.t1   |
| nvSP07 | chymotrypsin-like elastase family member 3B           | habu1_scaffold3296 : 1 ... 6460 : +                                                       | habu1_s3296_g11282   | habu1_s3296_g11282.t1   |
| nvSP08 | chymotrypsin-like protease CTRL-1                     | habu1_scaffold493 : 678049 ... 684597 : -                                                 | habu1_s493_g02255    | habu1_s493_g02255.t1    |
| nvSP09 | Neurotrypsin                                          | habu1_scaffold1537 : 430486 ... 473512 : +                                                | habu1_s1537_g05780   | habu1_s1537_g05780.t1   |
| nvSP10 | neurotrypsin-like                                     | habu1_scaffold2696 : 320034 ... 343955 : -                                                | habu1_s2696_g09609   | habu1_s2696_g09609.t1   |
| nvSP11 | thrombin                                              | habu1_scaffold10983 : 253158 ... 268223 : -<br>/habu1_scaffold10995 : 15124 ... 44505 : - | habu1_s10983_g20317  | habu1_s10983_g20317.t1  |
| nvSP12 | tissue-type plasminogen activator (tPA)               | habu1_scaffold2858 : 1135301 ... 1175837 : -                                              | habu1_s2858_g10253   | habu1_s2858_g10253.t1   |
| nvSP13 | plasma kallikrein                                     | habu1_scaffold11004 : 283304 ... 308535 : -                                               | habu1_s11004_g20335  | habu1_s11004_g20335.t1  |
| nvSP14 | Inactive serine protease 35                           | habu1_scaffold1630 : 31548 ... 63325 : -                                                  | habu1_s1630_g06161   | habu1_s1630_g06161.t1   |
| nvSP15 | inactive serine protease PAMR1-like                   | habu1_scaffold3643 : 56659 ... 132295 : -                                                 | habu1_s3643_g12251   | habu1_s3643_g12251.t1   |
| nvSP16 | Serine protease 23, partial                           | habu1_scaffold6061 : 41736 ... 53088 : +                                                  | habu1_s6061_g16640   | habu1_s6061_g16640.t1   |
| nvSP17 | serine protease 27-like                               | habu1_scaffold13321 : 1 ... 17475 : -                                                     | habu1_s13321_g21080  | habu1_s13321_g21080.t1  |
| nvSP18 | serine protease 27-like                               | habu1_scaffold2928 : 8492 ... 20060 : +                                                   | habu1_s2928_g10510   | habu1_s2928_g10510.t1   |
| nvSP19 | serine protease 27-like                               | habu1_scaffold661 : 20981 ... 65935 : -                                                   | habu1_s661_g03024    | habu1_s661_g03024.t1    |
| nvSP20 | serine protease 27-like                               | habu1_scaffold14979 : 1 ... 65141 : -                                                     | habu1_s14979_g21447  | habu1_s14979_g21447.t1  |
| nvSP21 | serine protease 33-like                               | habu1_scaffold661 : 80056 ... 108788 : +                                                  | habu1_s661_g03025    | habu1_s661_g03025.t1    |
| nvSP22 | transmembrane protease serine 12-like: partial        | habu1_scaffold5131 : 399731 ... 416735 : -                                                | habu1_s5131_g15292   | habu1_s5131_g15292.t1   |
| nvSP23 | serine protease 53                                    | habu1_scaffold3327 : 161929 ... 190072 : -                                                | habu1_s3327_g11330   | habu1_s3327_g11330.t1   |
| nvSP24 | serine protease 55-like                               | habu1_scaffold16606 : 34165 ... 36715 : -                                                 | habu1_s16606_g21794  | habu1_s16606_g21794.t1  |
| nvSP25 | serine protease 56                                    | habu1_scaffold2472 : 86176 ... 122259 : +                                                 | habu1_s2472_g09051   | habu1_s2472_g09051.t1   |
| nvSP26 | serine protease HTRA4                                 | habu1_scaffold2861 : 833394 ... 841595 : +                                                | habu1_s2861_g10303   | habu1_s2861_g10303.t1   |
| nvSP27 | serine protease HTRA1-like                            | habu1_scaffold1135 : 72756 ... 111731 : +                                                 | habu1_s1135_g03965   | habu1_s1135_g03965.t1   |
| nvSP28 | serine protease HTRA2, mitochondrial-like             | habu1_scaffold2921 : 104599 ... 106495 : -                                                | habu1_s2921_g10480   | habu1_s2921_g10480.t1   |
| nvSP29 | thymus-specific serine protease-like                  | habu1_scaffold1205 : 38676 ... 53312 : +                                                  | habu1_s1205_g04155   | habu1_s1205_g04155.t1   |
| nvSP30 | mannan-binding lectin serine protease 1-like: partial | habu1_scaffold76496 : 1 ... 797 : +                                                       | habu1_s76496_g23722  | habu1_s76496_g23722.t1  |
| nvSP31 | mannan-binding lectin serine protease 1 :partial      | habu1_scaffold120144 : 1 ... 3501 : +                                                     | habu1_s120144_g23985 | habu1_s120144_g23985.t1 |
| nvSP32 | mannan-binding lectin serine protease 2               | habu1_scaffold1702 : 13930 ... 24737 : -                                                  | habu1_s1702_g06326   | habu1_s1702_g06326.t1   |
| nvSP33 | mannan-binding lectin serine protease 2               | habu1_scaffold1703 : 1 ... 17225 : -                                                      | habu1_s1703_g06327   | habu1_s1703_g06327.t1   |
| nvSP34 | serine protease 27-like                               | habu1_scaffold14979 : 1 ... 65141 : -                                                     | habu1_s14979_g21447  | habu1_s14979_g21447.t1  |

(c)

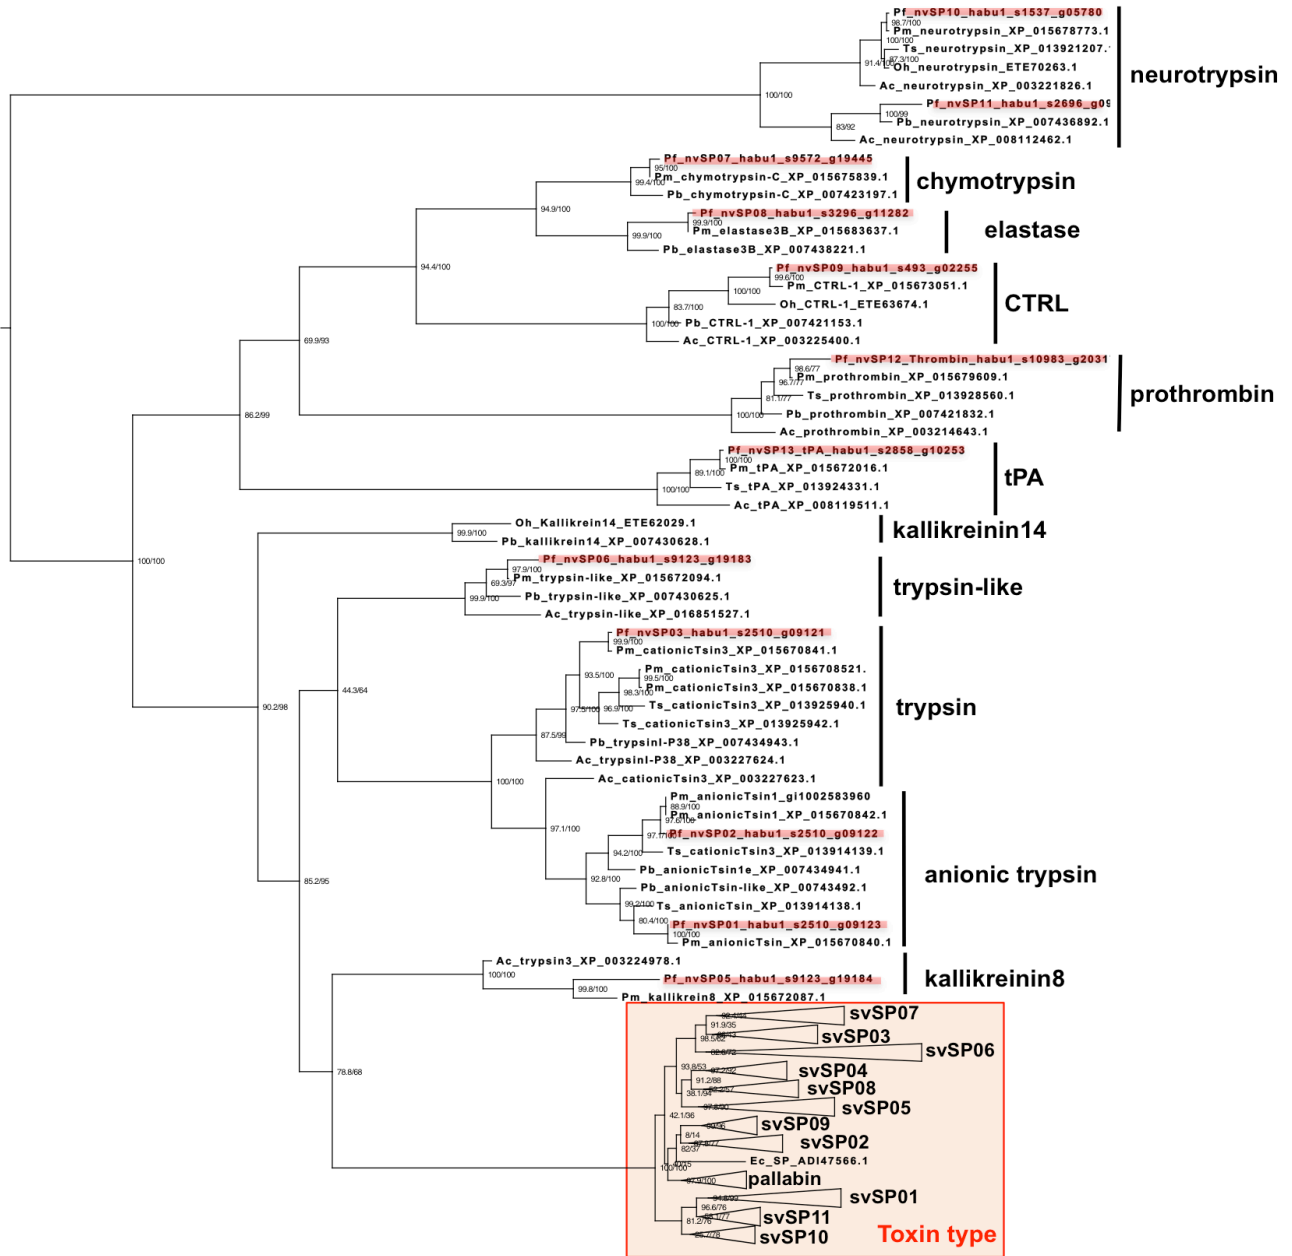

(d)

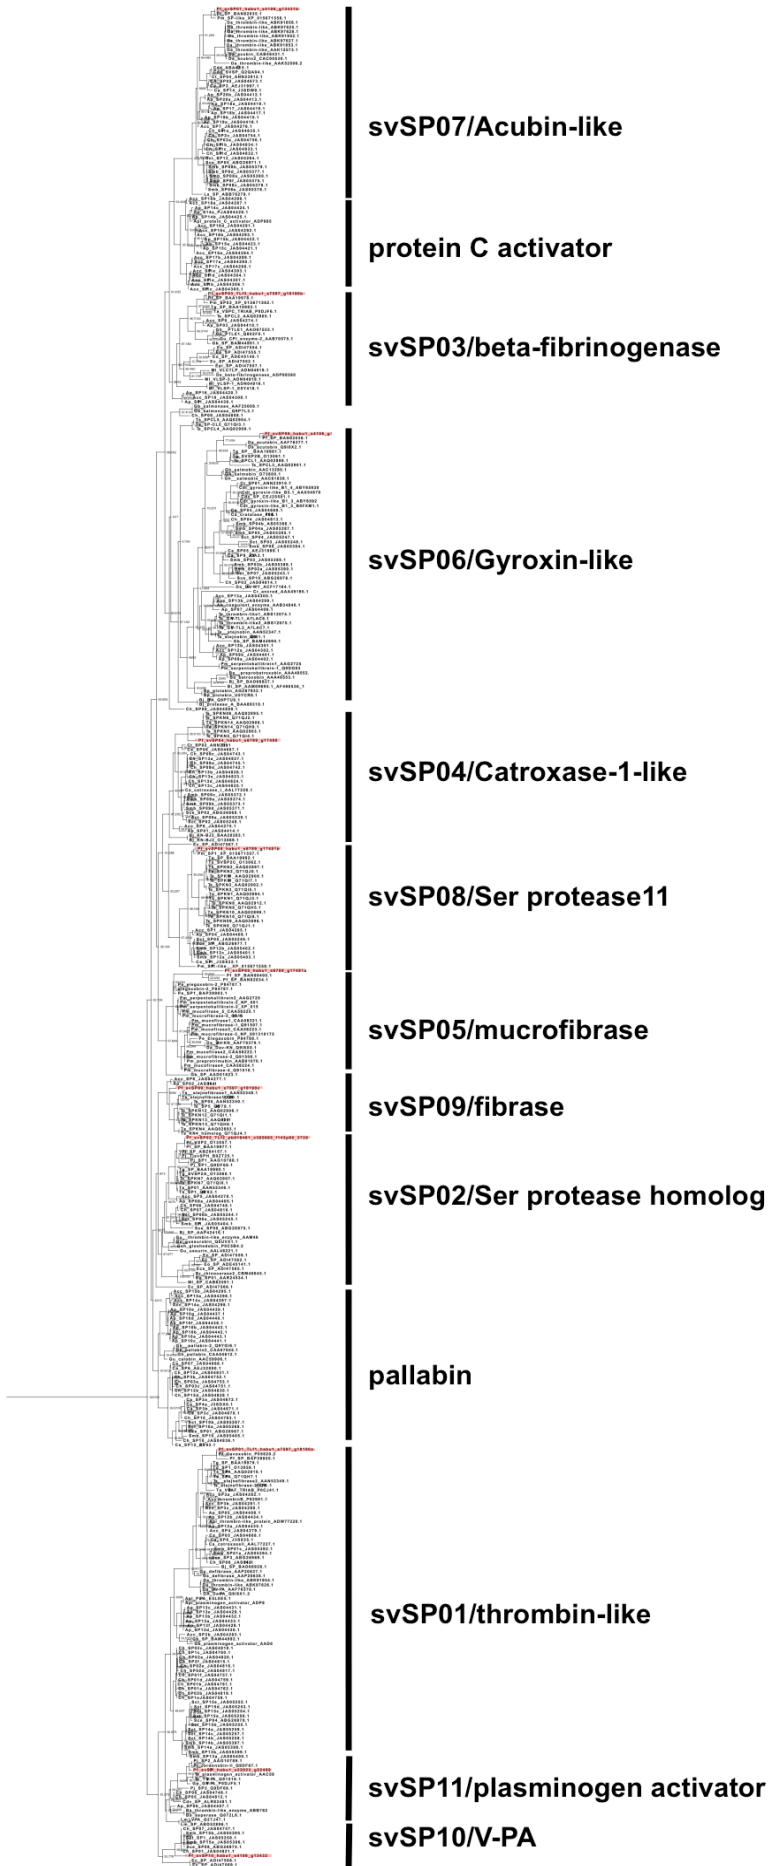

Supplementary Figure S5

**(a) SV genes**

| Gene      | Name                                                                  | Locus                                                                                                                                                                               | Gene Model ID        | Transcripts                |
|-----------|-----------------------------------------------------------------------|-------------------------------------------------------------------------------------------------------------------------------------------------------------------------------------|----------------------|----------------------------|
| svCTLTP01 | IX/X-bp alpha                                                         | habu1_scaffold11033: 12909...19459: +                                                                                                                                               |                      | pb016481_c1025238_f1p0_769 |
| svCTLTP02 | flavocetin-A alpha                                                    | habu1_scaffold375321: 193...344: +<br>habu1_scaffold81761: 5026...3746: -                                                                                                           |                      | pb016481_c1024339_f1p0_729 |
| svCTLTP03 | stejaggregin-A-like alpha                                             | habu1_scaffold10061: 161378...161319, 200154...203895: +                                                                                                                            | habu1_s10061_g19810c | pb016481_c1014958_f1p2_701 |
| svCTLTP04 | rhodocetin/EmEMS16-like alpha homologue/<br>stejaggregin-B-like alpha | habu1_scaffold10061: 161378...178891: -                                                                                                                                             | habu1_s10061_g19810a | pb016481_c1017202_f1p0_682 |
| svCTLTP05 | IX/X-bp beta_M                                                        | habu1_scaffold117853: 386...430: -<br>habu1_scaffold241669: 62...151: -<br>habu1_scaffold399881: 745...837: -<br>habu1_scaffold415837: 1...79: +<br>habu1_scaffold161573: 4...96: + |                      | pb016480_c398342_f1p1_706  |
| svCTLTP06 | flavocetin-A beta                                                     | habu1_scaffold10061: 155982... 167335: -                                                                                                                                            | habu1_s10061_g19809  | pb016481_c1018124_f1p2_702 |
| svCTLTP07 | rhodocetinEMS16-like-beta                                             | habu1_scaffold10061: 184382...193870: -                                                                                                                                             | habu1_s10061_g19810b | pb016481_c1013095_f1p6_704 |
| svCTLTP08 | C-lectin02                                                            | habu1_scaffold3168: 129063... 132925: -                                                                                                                                             | habu1_s3168_g10977   | habu1_s3168_g10977.t1      |
| svCTLTP09 | Pf_CTLTP_FIX/X BP-A_like                                              | habu1_scaffold399941: 1...7140: +<br>habu1_scaffold75126_1_926: +                                                                                                                   |                      | pb016481_c1017356_f1p0_692 |
| svCTLTP10 | pb016481_c1008289_f1p0_724                                            | habu1_scaffold3168: 97112... 103333: +                                                                                                                                              | habu1_s3168_g10975   | pb016481_c1008289_f1p0_724 |

**(b) NV genes**

| Gene       | Name                                                                                          | Locus                                     | Gene Model ID        | Transcripts             |
|------------|-----------------------------------------------------------------------------------------------|-------------------------------------------|----------------------|-------------------------|
| nvCTLTP01  | C-type lectin                                                                                 | habu1_scaffold10061: 25086... 32544: +    | habu1_s10061_g19804  | habu1_s10061_g19804.t1  |
| nvCTLTP02  | C-type lectin-like                                                                            | habu1_scaffold10061: 44806... 51663: +    | habu1_s10061_g19805  | habu1_s10061_g19805.t1  |
| nvCTLTP03  | C-type Lectin CRL-like                                                                        | habu1_scaffold10061: 52556... 89545: +    | habu1_s10061_g19806  | habu1_s10061_g19806.t1  |
| nvCTLTP04  | thymidine phosphorylase                                                                       | habu1_scaffold10061: 93712... 132005: -   | habu1_s10061_g19807  | habu1_s10061_g19807.t1  |
| nvCTLTP05  | C-type lectin:regenerating islet-derived protein 4-like                                       | habu1_scaffold10061: 139236... 146528: +  | habu1_s10061_g19808  | habu1_s10061_g19808.t1  |
| nvCTLTP06  | C-type lectin BiL-like                                                                        | habu1_scaffold10589: 1... 10687: +        | habu1_s10589_g20136  | habu1_s10589_g20136.t1  |
| nvCTLTP07  |                                                                                               | habu1_scaffold10590: 1... 60935: -        | habu1_s10590_g20137  | habu1_s10590_g20137.t1  |
| nvCTLTP08  |                                                                                               | habu1_scaffold10590: 62389... 78515: -    | habu1_s10590_g20138  | habu1_s10590_g20138.t1  |
| nvCTLTP-09 | C-type lectin BiL-like                                                                        | habu1_scaffold20885: 1... 6175: -         | habu1_s20885_g22359  | habu1_s20885_g22359.t1  |
| nvCTLTP-10 | C-type lectin Cal-like                                                                        | habu1_scaffold20885: 9716... 23508: +     | habu1_s20885_g22360  | habu1_s20885_g22360.t1  |
| nvCTLTP-11 |                                                                                               | habu1_scaffold3162: 1... 44155: -         | habu1_s3162_g10961   | habu1_s3162_g10961.t1   |
| nvCTLTP-12 | C-lectin01                                                                                    | habu1_scaffold3168: 105257... 110525: -   | habu1_s3168_g10976   | habu1_s3168_g10976.t1   |
| nvCTLTP-13 | C-lectin03 (olfactory receptor 5V1-like [Python bivittatus])                                  | habu1_scaffold3168: 132988... 153875: -   | habu1_s3168_g10978   | habu1_s3168_g10978.t1   |
| nvCTLTP-14 | C-lectin04                                                                                    | habu1_scaffold3168: 158476... 201437: +   | habu1_s3168_g10979   | habu1_s3168_g10979.t1   |
| nvCTLTP-15 | C-type lectin                                                                                 | habu1_scaffold5624: 612654... 645778: -   | habu1_s5624_g16096   | habu1_s5624_g16096.t1   |
| nvCTLTP-16 | C-type lectin domain family 2 member A-like                                                   | habu1_scaffold2729: 242646... 255780: +   | habu1_s2729_g09708   | habu1_s2729_g09708.t1   |
| nvCTLTP-17 | C-type lectin domain family 2 member B-like                                                   | habu1_scaffold4914: 32203... 44645: -     | habu1_s4914_g14978   | habu1_s4914_g14978.t1   |
| nvCTLTP-18 | C-type lectin domain family 2 member D                                                        | habu1_scaffold16096: 1593... 16985: -     | habu1_s16096_g21607  | habu1_s16096_g21607.t1  |
| nvCTLTP-19 | C-type lectin domain family 2 member D                                                        | habu1_scaffold16095: 1... 33634: +        | habu1_s16095_g21604  | habu1_s16095_g21604.t1  |
| nvCTLTP-20 | C-type lectin domain family 2 member D-like isoform                                           | habu1_scaffold7470: 7148... 64124: +      | habu1_s7470_g18072   | habu1_s7470_g18072.t1   |
| nvCTLTP-21 | C-type lectin domain family 2 member D-like                                                   | habu1_scaffold2729: 287626... 301914: +   | habu1_s2729_g09710   | habu1_s2729_g09710.t1   |
| nvCTLTP-22 | C-type lectin domain family 2 member D-like                                                   | habu1_scaffold2729: 269596... 280053: +   | habu1_s2729_g09709   | habu1_s2729_g09709.t1   |
| nvCTLTP-23 | C-type lectin domain family 2 member F                                                        | habu1_scaffold650: 139753... 147435: -    | habu1_s650_g02983    | habu1_s650_g02983.t1    |
| nvCTLTP-24 | C-type lectin domain family 2 member F                                                        | habu1_scaffold16095: 20706... 30572: +    | habu1_s16095_g21605  | habu1_s16095_g21605.t1  |
| nvCTLTP-25 | C-type lectin domain family 4 member F                                                        | habu1_scaffold5437: 1... 163815: -        | habu1_s5437_g15753   | habu1_s5437_g15753.t1   |
| nvCTLTP-26 | C-type lectin domain family 4 member F                                                        | habu1_scaffold5437: 175001... 184325: -   | habu1_s5437_g15754   | habu1_s5437_g15754.t1   |
| nvCTLTP-27 | C-type lectin domain family 4 member G                                                        | habu1_scaffold9852: 245036... 264242: +   | habu1_s9852_g19732   | habu1_s9852_g19732.t1   |
| nvCTLTP-28 | C-type lectin domain family 5 member A-like                                                   | habu1_scaffold356: 6432... 15155: -       | habu1_s356_g01674    | habu1_s356_g01674.t1    |
| nvCTLTP-29 | C-type lectin domain family 10 member A                                                       | habu1_scaffold399929: 2366... 26492: +    | habu1_s399929_g24822 | habu1_s399929_g24822.t1 |
| nvCTLTP-30 | C-type lectin domain family 10 member A                                                       | habu1_scaffold399929: 28656... 34341: +   | habu1_s399929_g24823 | habu1_s399929_g24823.t1 |
| nvCTLTP-31 | C-type lectin domain family 10 member A                                                       | habu1_scaffold399929: 35256... 46873: +   | habu1_s399929_g24824 | habu1_s399929_g24824.t1 |
| nvCTLTP-32 | C-type lectin domain family 11 member A                                                       | habu1_scaffold6124: 381916... 408060: +   | habu1_s6124_g16816   | habu1_s6124_g16816.t1   |
| nvCTLTP-33 | C-type lectin domain family 17, member A: ow affinity immunoglobulin epsilon Fc receptor-like | habu1_scaffold9852: 223468... 243595: -   | habu1_s9852_g19731   | habu1_s9852_g19731.t1   |
| nvCTLTP-34 | C-type lectin domain family 17, member A                                                      | habu1_scaffold2388: 1078710... 1129431: - | habu1_s2388_g08701   | habu1_s2388_g08701.t1   |
| nvCTLTP-35 | C-type lectin domain family 17, member A                                                      | habu1_scaffold4489: 1161650... 1171504: - | habu1_s4489_g14309   | habu1_s4489_g14309.t1   |
| nvCTLTP-36 | collectin-10                                                                                  | habu1_scaffold24: 236156... 286149: +     | habu1_s24_g00208     | habu1_s24_g00208.t1     |
| nvCTLTP-37 | collectin-11                                                                                  | habu1_scaffold1294: 282428... 290611: -   | habu1_s1294_g04540   | habu1_s1294_g04540.t1   |
| nvCTLTP-38 | collectin-12                                                                                  | habu1_scaffold2067: 4679... 91925: -      | habu1_s2067_g07546   | habu1_s2067_g07546.t1   |
| nvCTLTP-39 | E-selectin isoform X1                                                                         | habu1_scaffold20406: 1... 19656: -        | habu1_s20406_g22285  | habu1_s20406_g22285.t1  |
| nvCTLTP-40 | olfactory receptor 5V1-like                                                                   | habu1_scaffold3168: 205916... 208854: +   | habu1_s3168_g10980   | habu1_s3168_g10980.t1   |

Supplementary Figure S5 continued

(c)

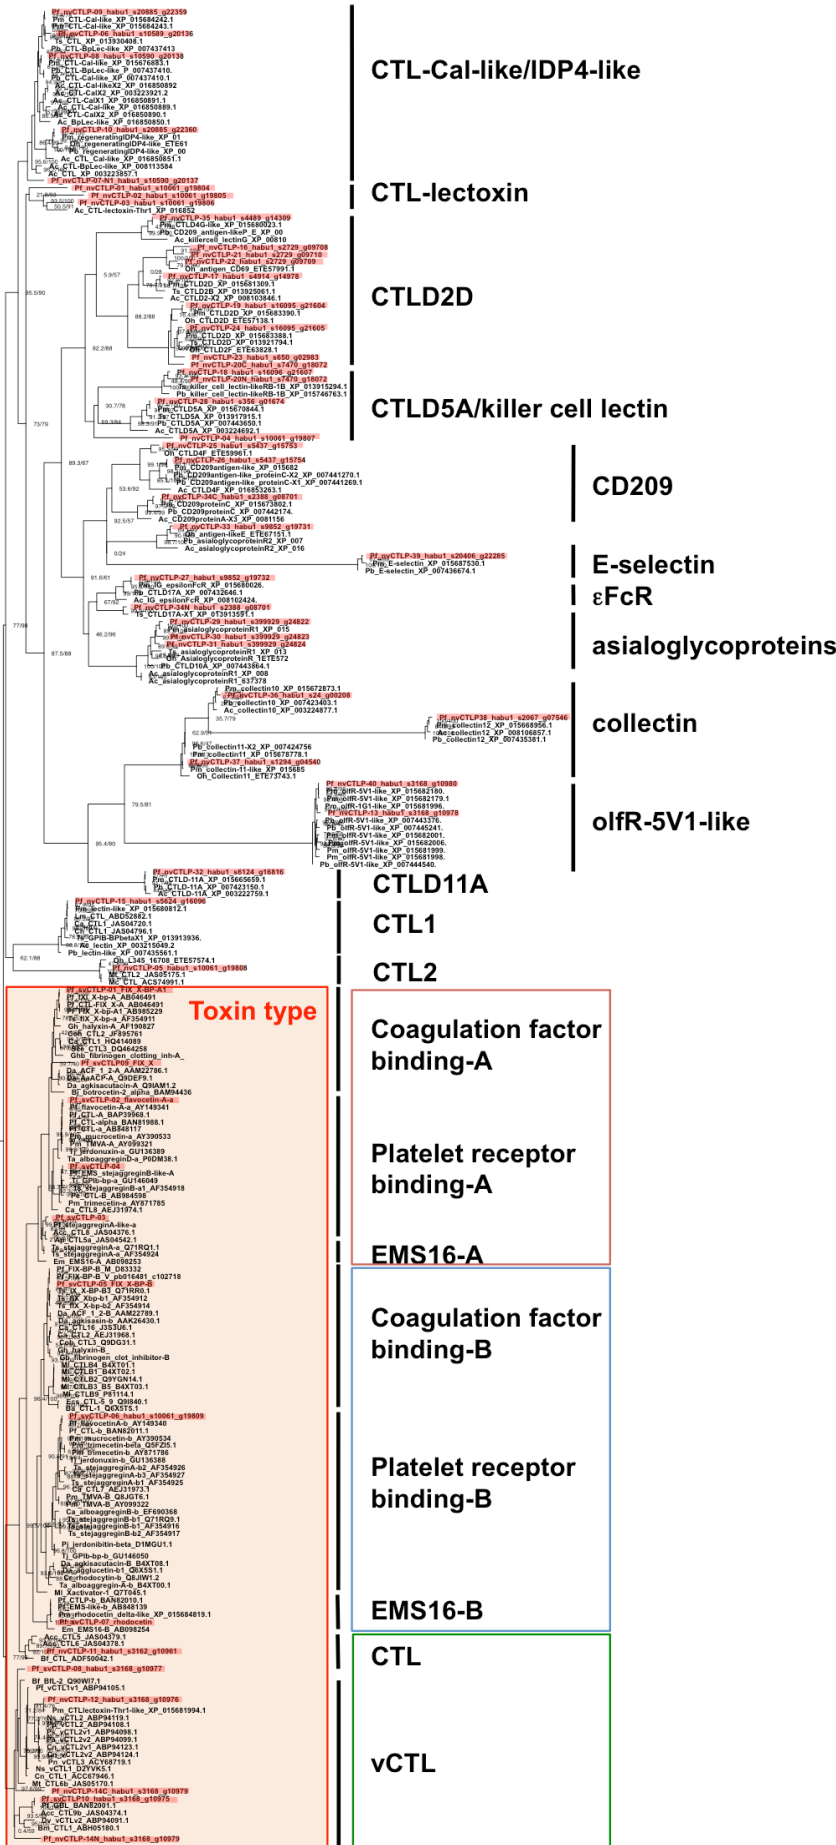

## Supplementary Figure S6.

### (a) SV genes

| Gene      | Name                | Locus                                   | Gene Model ID        | Transcripts                |
|-----------|---------------------|-----------------------------------------|----------------------|----------------------------|
| svPLA2-01 | Asp49PLA2/PL1a/PL2a | habu1_scaffold9571 : 7266 ... 11848 : + | habu1_s9571_g19434   | pb016481_c1004773_f1p3_727 |
| svPLA2-02 | PL-Y/PL-X/PL-B      | habu1_scaffold47459 : 1268 ... 2998 : - | habu1_s47459_g23397a | pb016481_c1023909_f1p0_734 |
| svPLA2-03 | PLA-N               | habu1_scaffold47459 : 1264 ... 3188 : - | habu1_s47459_g23397b | pb016481_c1016263_f1p3_727 |
| svPLA2-04 | BPI                 | habu1_scaffold50376:2642...1454: -      |                      | pb016481_c1030113_f1p0_731 |
| svPLA2-05 | BPII                | habu1_scaffold9571 : 1 ... 1869 : -     |                      | pb016481_c1028655_f1p0_728 |
| svPLA2-06 | BPIII               | habu1_scaffold401404: 1...365: -        |                      |                            |
| svPLA2-07 | PL1b/PL2b           | habu1_scaffold9570:1...742: +           | habu1_s9570_g19432   | pb016481_c1024179_f1p5_745 |
| svPLA2-08 | PfPLA6              | habu1_scaffold9571 : 1 ... 8417 : -     | habu1_s9571_g19433   | habu1_s9571_g19433.t2      |
| svPLA2-09 | pgPLA2b             | habu1_scaffold9571:16216...17662: +     |                      | pb016481_c1027830_f1p0_729 |

### (b) NV genes

| Gene      | Name        | Locus                                       | Gene Model ID       | Transcripts               |
|-----------|-------------|---------------------------------------------|---------------------|---------------------------|
| nvPLA2-01 | PLA2_G1_1   | habu1_scaffold9792:202026..204267: +        | habu1_s9792_g19655  | habu1_s9792_g19655.t1     |
| nvPLA2-02 | PLA2_G1_2   | habu1_scaffold9792:206686..208528: +        | habu1_s9792_g19656  | habu1_s9792_g19656.t1     |
| nvPLA2-03 | PLA2_G2E_1  | habu1_scaffold4562 : 336326 ... 340919: -   | habu1_s4562_g14470  | habu1_s4562_g14470.t1     |
| nvPLA2-04 | PLA2_G3_2   | habu1_scaffold2696 : 770786 ... 776844: +   | habu1_s2696_g09640  | habu1_s2696_g09640.t1     |
| nvPLA2-05 | PLA2_G3_4   | habu1_scaffold3088 : 458 ... 5355: -        | habu1_s3088_g10883  | habu1_s3088_g10883.t1     |
| nvPLA2-06 | PLA2_G10_1  | habu1_scaffold194 : 345256 ... 364398: +    | habu1_s194_g01103   | habu1_s194_g01103.t1      |
| nvPLA2-07 | PLA2_G10_2  | habu1_scaffold194 : 366490 ... 382195: -    | habu1_s194_g01104   | habu1_s194_g01104.t1      |
| nvPLA2-08 | PLA2_G10_3  | habu1_scaffold2789 : 707889 ... 711217: +   | habu1_s2789_g09989  | habu1_s2789_g09989.t1     |
| nvPLA2-09 | PLA2_G12A_1 | habu1_scaffold3769 : 1122983 ... 1127025: + | habu1_s3769_g12642  | habu1_s3769_g12642.t1     |
| nvPLA2-10 | PLA2_G12B_1 | habu1_scaffold2074 : 358299 ... 399065: -   | habu1_s2074_g07581  | habu1_s2074_g07581.t1     |
| nvPLA2-11 | PLA2_G15_1  | habu1_scaffold499 : 736999 ... 788724: +    | habu1_s499_g02314   | habu1_s499_g02314.t1      |
| nvPLA2-12 | PLA2_G15_3  | habu1_scaffold53923 : 12382 ... 17295: -    | habu1_s53923_g23499 | habu1_s53923_g23499.t1    |
| nvPLA2-13 | PLA2_G15_4  | habu1_scaffold5562 : 106910 ... 108039: -   |                     | pb016480_c10250_f1p0_1130 |
| nvPLA2-14 | PLA2        | habu1_scaffold2192 : 72907 ... 74929: -     | habu1_s2192_g07871  | habu1_s2192_g07871.t1     |
| nvPLA2-15 | PLA2G4A     | habu1_scaffold8317 : 5635 ... 95005: -      | habu1_s8317_g18615  | habu1_s8317_g18615.t1     |
| nvPLA2-16 | PLA2G4B_1   | habu1_scaffold3646:1..6155: -               | habu1_s3646_g12259  | habu1_s3646_g12259.t1     |
| nvPLA2-17 | PLA2G4B_2   | habu1_scaffold3645 : 202517 ... 283015: -   | habu1_s3645_g12258  | habu1_s3645_g12258.t1     |
| nvPLA2-18 | PLA2G4C_3   | habu1_scaffold11920:77736..127822: +        | habu1_s11920_g20651 | habu1_s11920_g20651.t1    |
| nvPLA2-19 | PLA2G4C_4   | habu1_scaffold32464 : 1 ... 60356: +        | habu1_s32464_g23033 | habu1_s32464_g23033.t1    |
| nvPLA2-20 | PLA2_B      | habu1_scaffold2320 : 573149 ... 601069: +   | habu1_s2320_g08440  | habu1_s2320_g08440.t1     |
| nvPLA2-21 | PLA2_B      | habu1_scaffold2321 : 2106 ... 33861: +      | habu1_s2321_g08441  | habu1_s2321_g08441.t1     |
| nvPLA2-22 | PLA2G4F     | habu1_scaffold2323 : 1 ... 38699: +         | habu1_s2323_g08442  | habu1_s2323_g08442.t1     |
| nvPLA2-23 | PLA2G4E_2   | habu1_scaffold3645 : 9056 ... 58091: +      | habu1_s3645_g12255  | habu1_s3645_g12255.t1     |
| nvPLA2-24 | PLA2G4E_4   | habu1_scaffold2324 : 1 ... 70129: +         | habu1_s2324_g08443  | habu1_s2324_g08443.t1     |
| nvPLA2-25 | PLA2G4E_5   | habu1_scaffold2324 : 74886 ... 119324: +    | habu1_s2324_g08444  | habu1_s2324_g08444.t1     |
| nvPLA2-26 | PLA2G4E_6   | habu1_scaffold2324 : 122456 ... 211367: +   | habu1_s2324_g08445  | habu1_s2324_g08445.t1     |
| nvPLA2-27 | PLA2G6      | habu1_scaffold7565 : 780358 ... 836117: +   | habu1_s7565_g18177  | habu1_s7565_g18177.t1     |
| nvPLA2-28 | PNPLA8      | habu1_scaffold5091 : 1 ... 61165: -         | habu1_s5091_g15231  | habu1_s5091_g15231.t1     |
| nvPLA2-29 | PLA1        | habu1_scaffold5830 : 1665 ... 118015: -     | habu1_s5830_g16316  | habu1_s5830_g16316.t1     |
| nvPLA2-30 | PLA2_G16    | habu1_scaffold1542 : 1 ... 34425: +         | habu1_s1542_g05787  | habu1_s1542_g05787.t1     |
| nvPLA2-31 | PLA1mA      | habu1_scaffold19666 : 1 ... 11400: +        | habu1_s19666_g22161 | habu1_s19666_g22161.t1    |



Supplementary Figure S6 continued

(c)

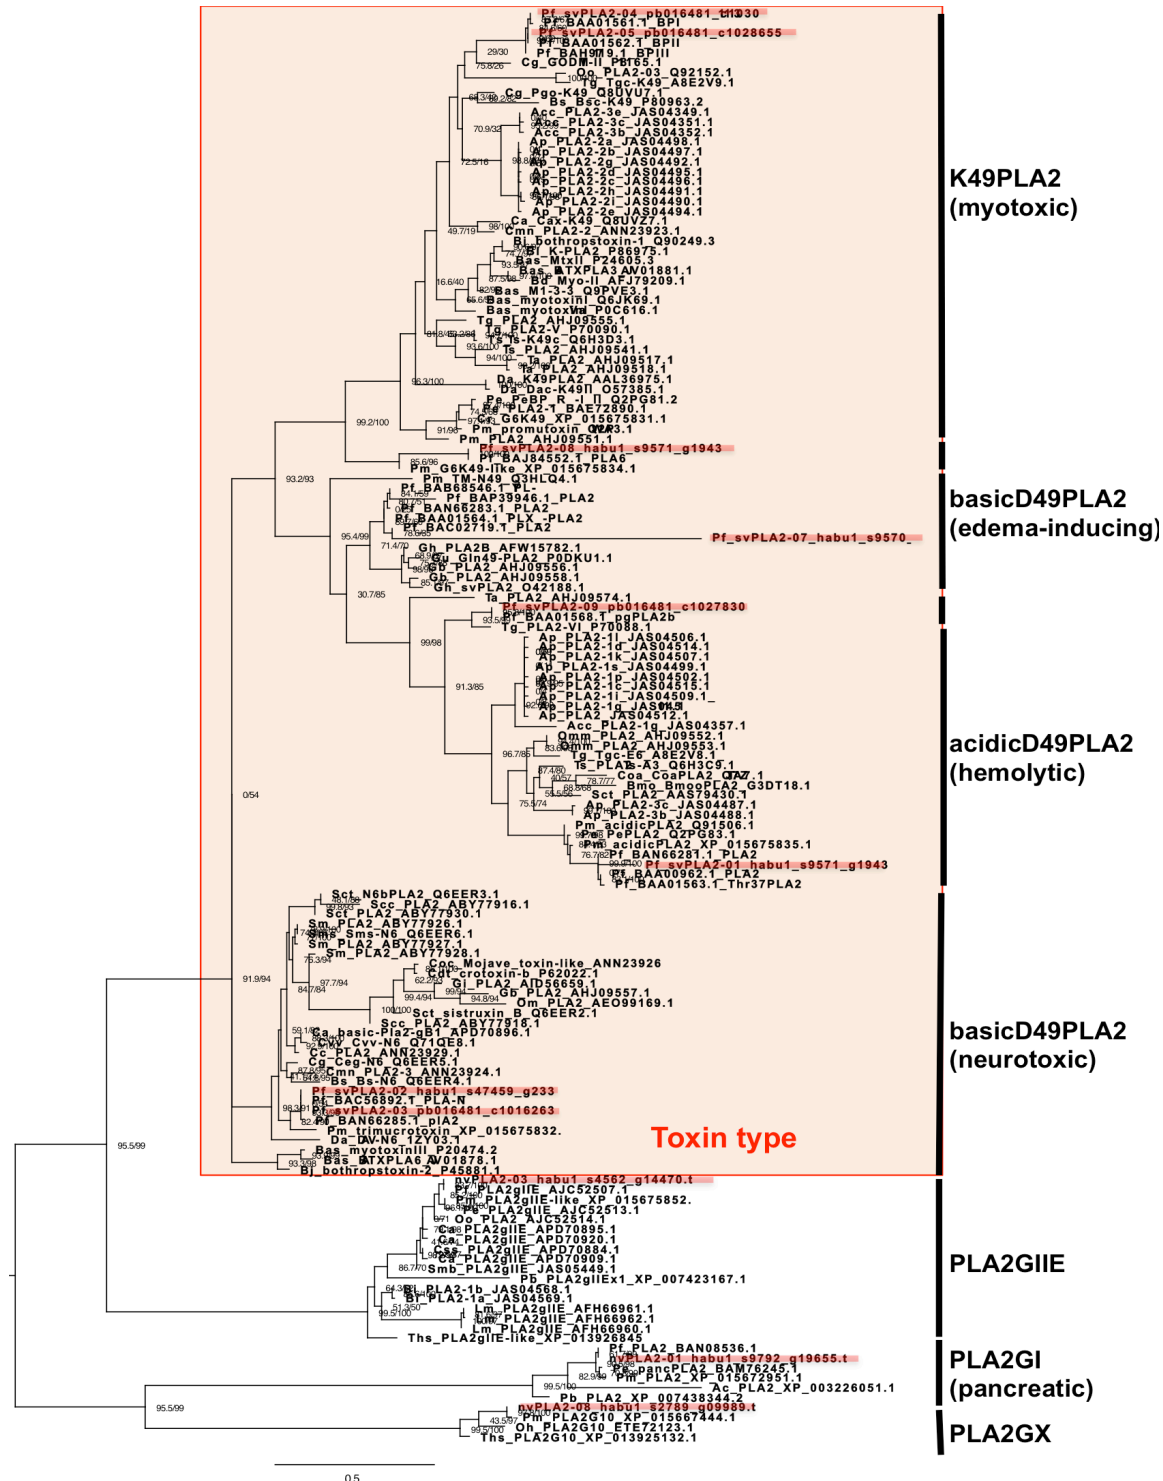

Supplementary Figure S7

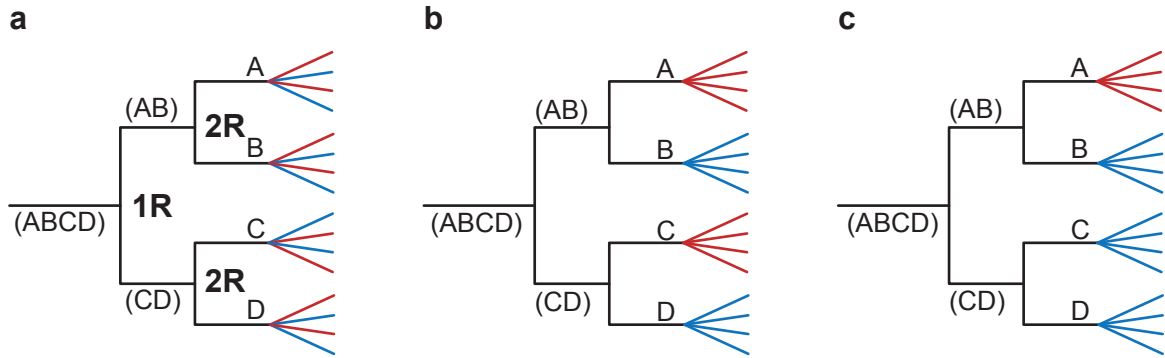

# Supplementary Figure S8.

## a MP

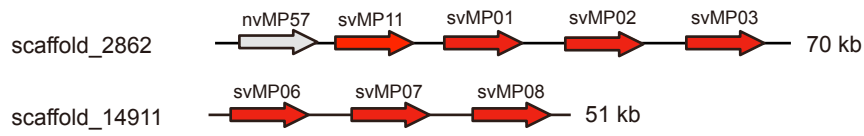

## b SP

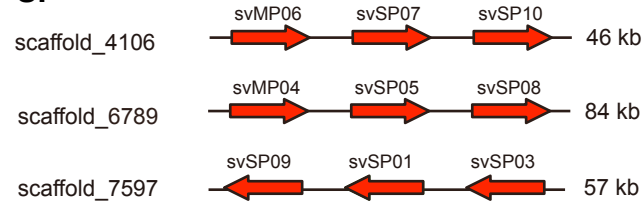

## c CTLP

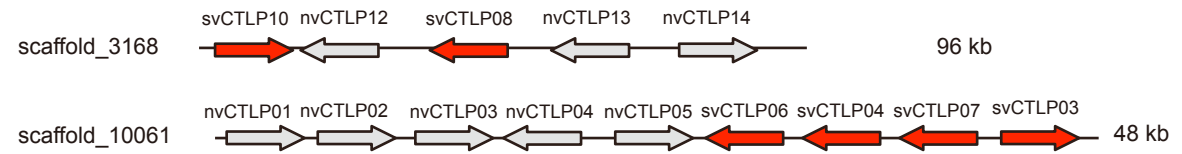

Supplemental Figure S9

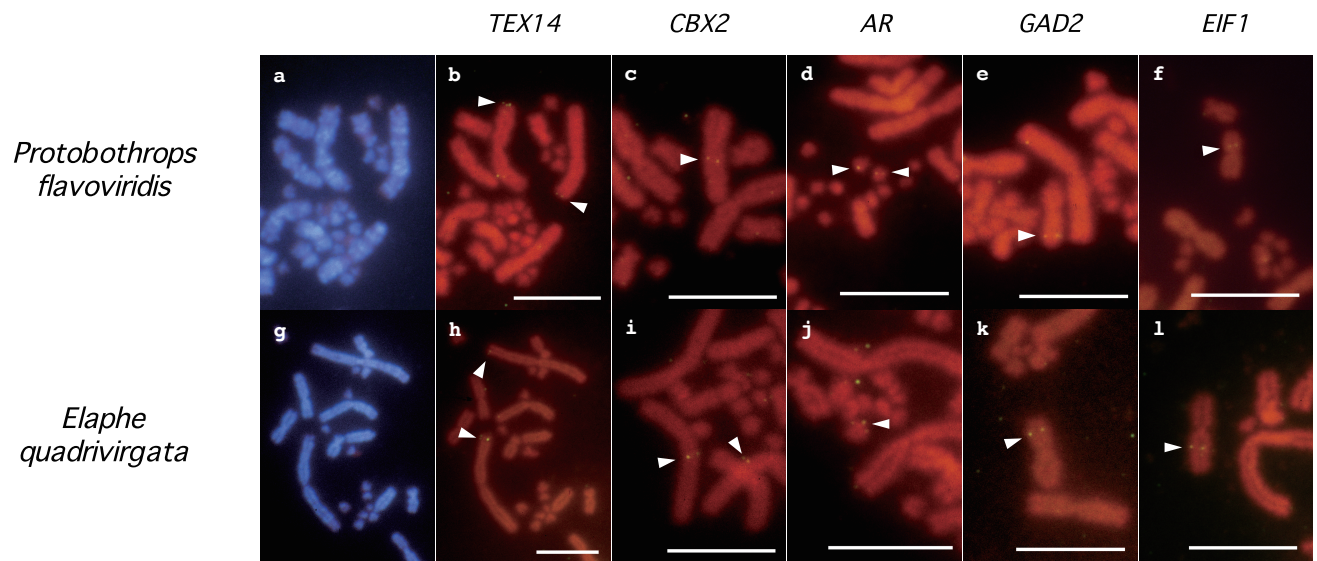

Supplementary Figure S10

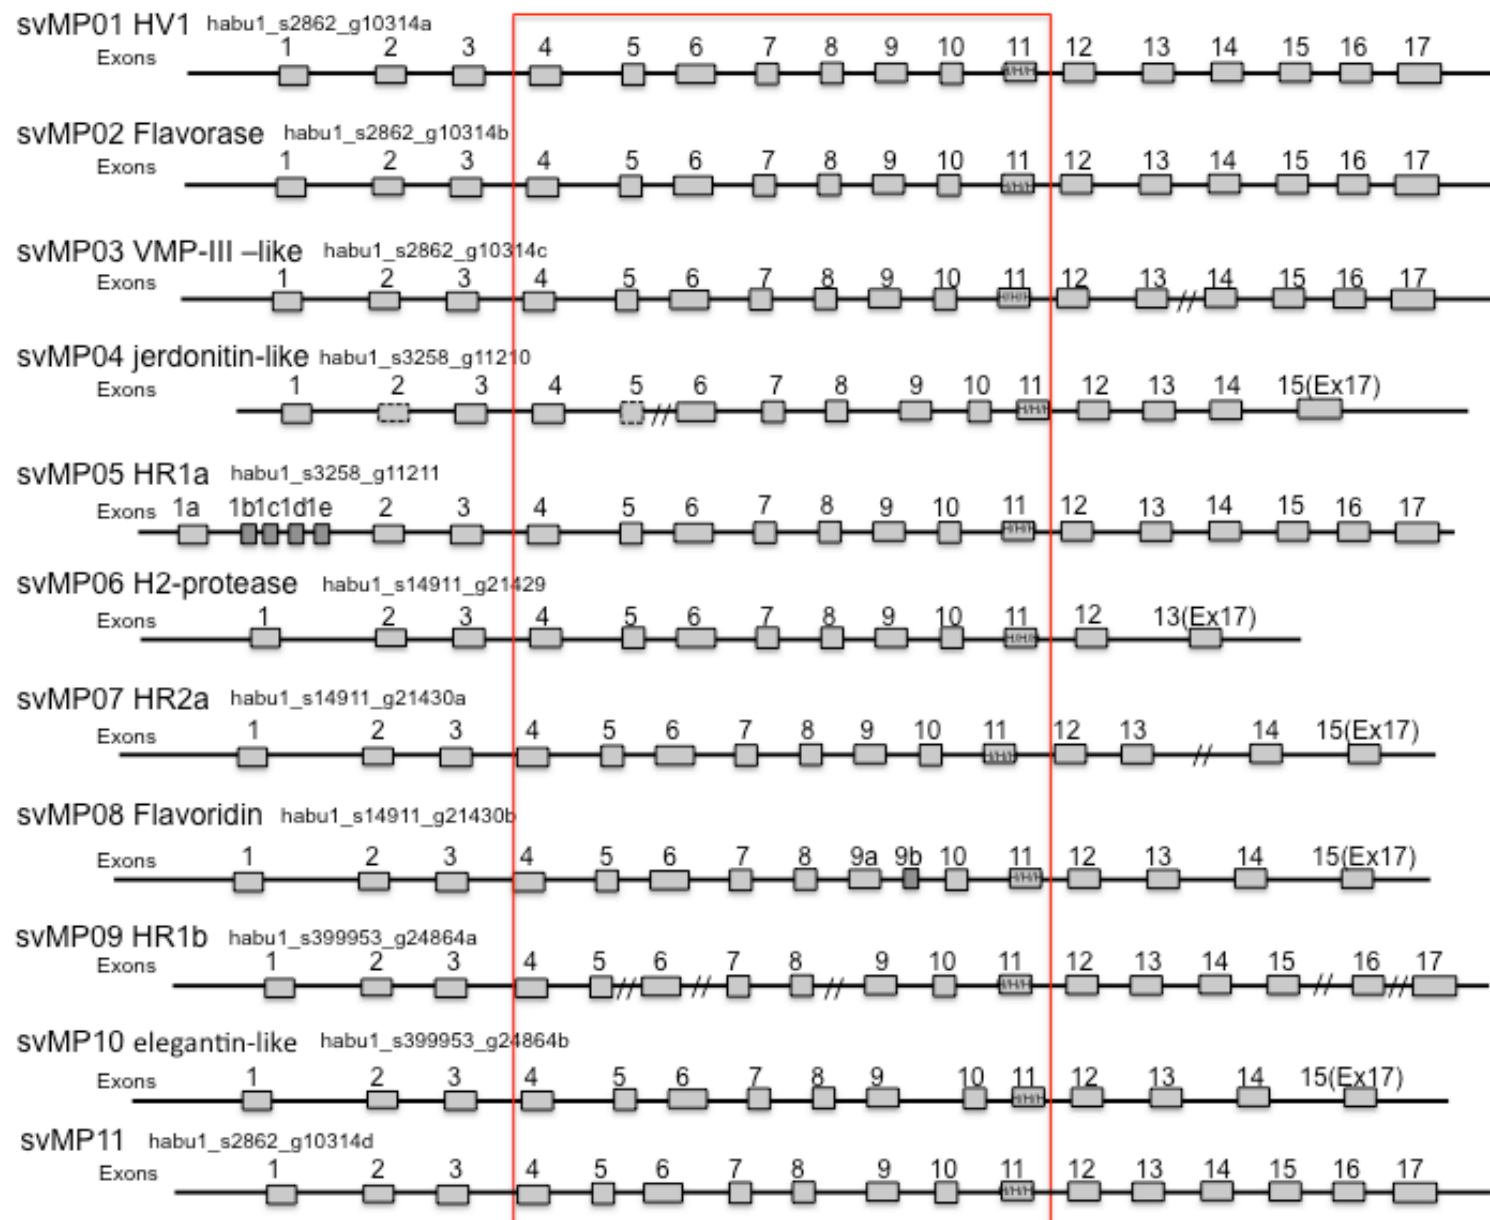

a

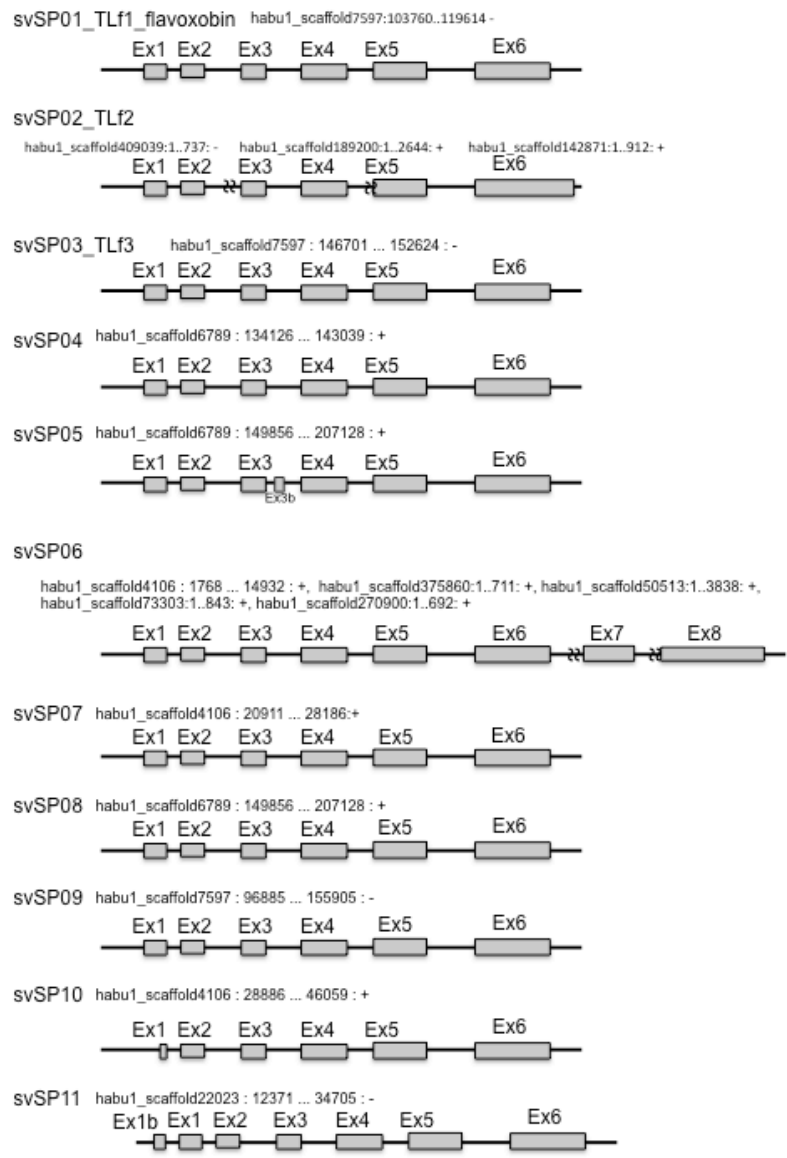

b

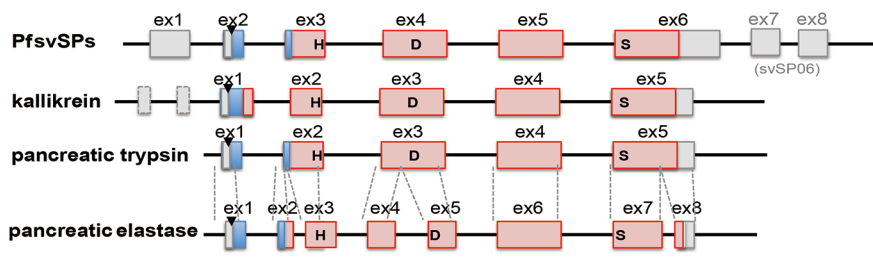

Supplementary Figure S12

(a)

| Gene            | Name                         | Locus                                      | Gene Model ID      | Transcripts               |
|-----------------|------------------------------|--------------------------------------------|--------------------|---------------------------|
| 3FTX01 (sv3FTX) | Pf_3FTX-01                   | habu1_scaffold4579 : 59513 ... 76175 : -   | habu1_s4579_g14476 | pb016480_c396810_f1p0_507 |
| 3FTX02 (sv3FTX) | Pf_3FTX-02                   | habu1_scaffold4579 : 119426 ... 122076 : + | habu1_s4579_g14477 | habu1_s4579_g14477.t1     |
| 3FTX03 (sv3FTX) | Pf_3FTX-03                   | habu1_scaffold4579 : 142940 ... 144965 : - | habu1_s4579_g14478 | habu1_s4579_g14478.t1     |
| 3FTX04 (sv3FTX) | Pf_3FTX-04                   | habu1_scaffold4579 : 45965 ... 48865 : -   | habu1_s4579_g14475 | habu1_s4579_g14475.t1     |
| 3FTX05 (nv3FTX) | Pf_3FTX-05 (UPAR_LY6, CD59A) | habu1_scaffold138 : 73600 ... 130505 : -   | habu1_s138_g00722  | habu1_s138_g00722.t1      |
| 3FTX06 (nv3FTX) | Pf_3FTX-06 (CD59B)           | habu1_scaffold138 : 62681 ... 68945 : -    | habu1_s138_g00721  | habu1_s138_g00721.t1      |

(b)

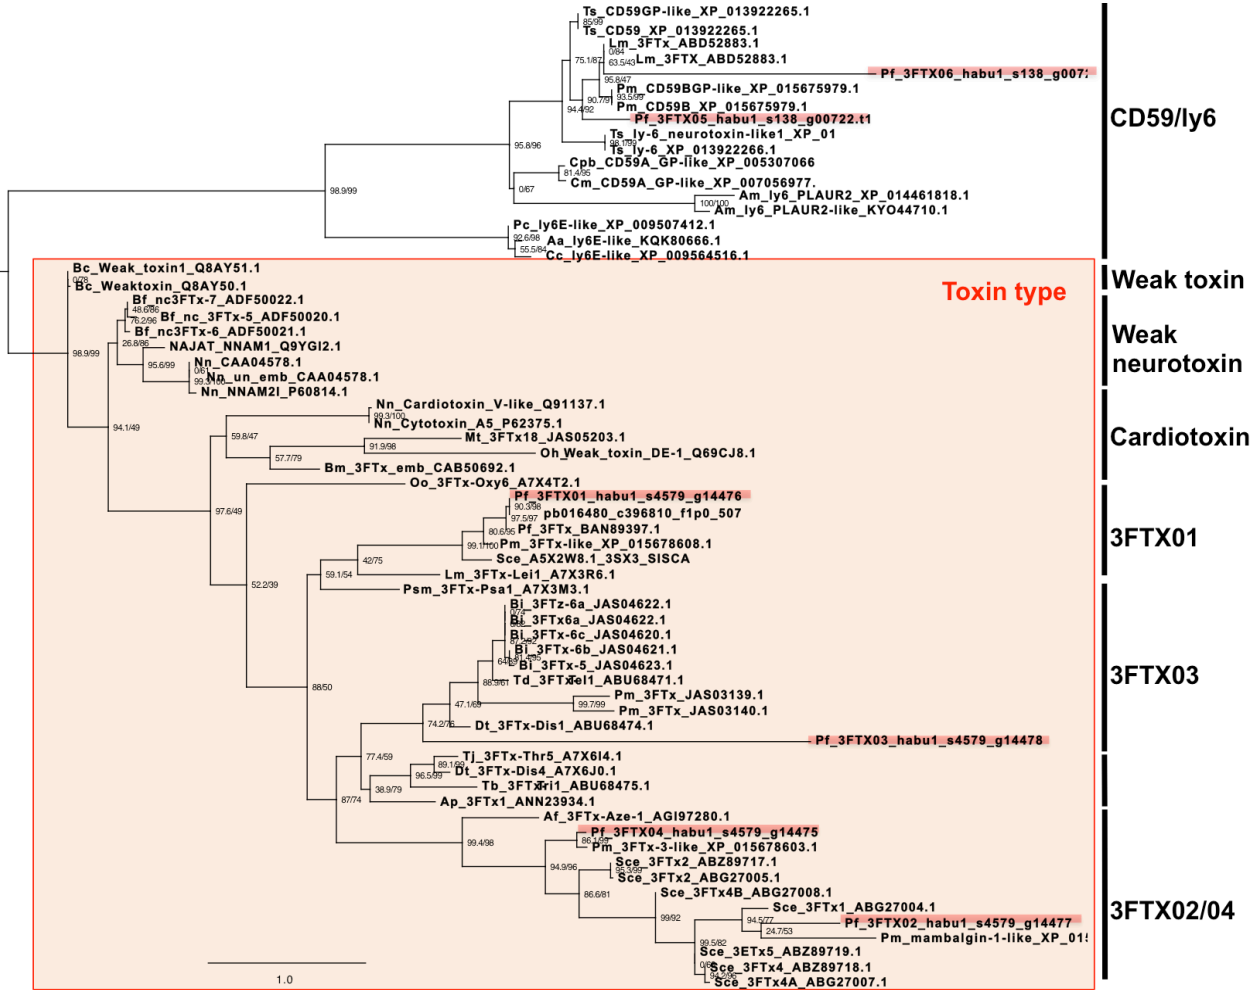

Supplementary Figure S 13

(a)

| Gene    | Name             | Locus                       | Gene model ID                                | Transcripts        |
|---------|------------------|-----------------------------|----------------------------------------------|--------------------|
| APase01 | APaseN (svAPase) | aminopeptidase N            | habu1_scaffold1390 : 1416444 ... 1437202 : + | habu1_s1390_g05001 |
| APase02 | APaseNPEPL       | aminopeptidase NPEPL        | habu1_scaffold5205 : 360816 ... 379669 : +   | habu1_s5205_g15384 |
| APase03 | APaseA (svAPase) | aminopeptidase A            | habu1_scaffold3769 : 814477 ... 861472 : -   | habu1_s3769_g12636 |
| APase04 | APaseB           | aminopeptidase B            | habu1_scaffold8948 : 297629 ... 311470 : +   | habu1_s8948_g19021 |
| APase05 | APaseO           | aminopeptidase O            | habu1_scaffold4166 : 161346 ... 345243 : +   | habu1_s4166_g13605 |
| APase06 | APaseQ           | aminopeptidase Q            | habu1_scaffold3446 : 147415 ... 149419 : -   | habu1_s3446_g11762 |
| APase07 | APaseD           | aspartyl aminopeptidase     | habu1_scaffold133 : 520486 ... 540509 : +    | habu1_s133_g00676  |
| APase08 | APaseM1          | methionine aminopeptidase 1 | habu1_scaffold7599 : 75984 ... 96985 : -     | habu1_s7599_g18195 |
| APase09 | APaseM2          | methionine aminopeptidase 2 | habu1_scaffold9114 : 242443 ... 254705 : -   | habu1_s9114_g19166 |
| APase10 | XPAPase1         | xaa-pro aminopeptidase 1    | habu1_scaffold4753 : 86146 ... 168417 : +    | habu1_s4753_g14695 |
| APase11 | XPAPase2         | xaa-pro aminopeptidase 2    | habu1_scaffold4159 : 322646 ... 384475 : +   | habu1_s4159_g13556 |
| APase12 | XPAPase3         | xaa-pro aminopeptidase 3    | habu1_scaffold1233 : 167726 ... 197694 : +   | habu1_s1233_g04248 |

(b)

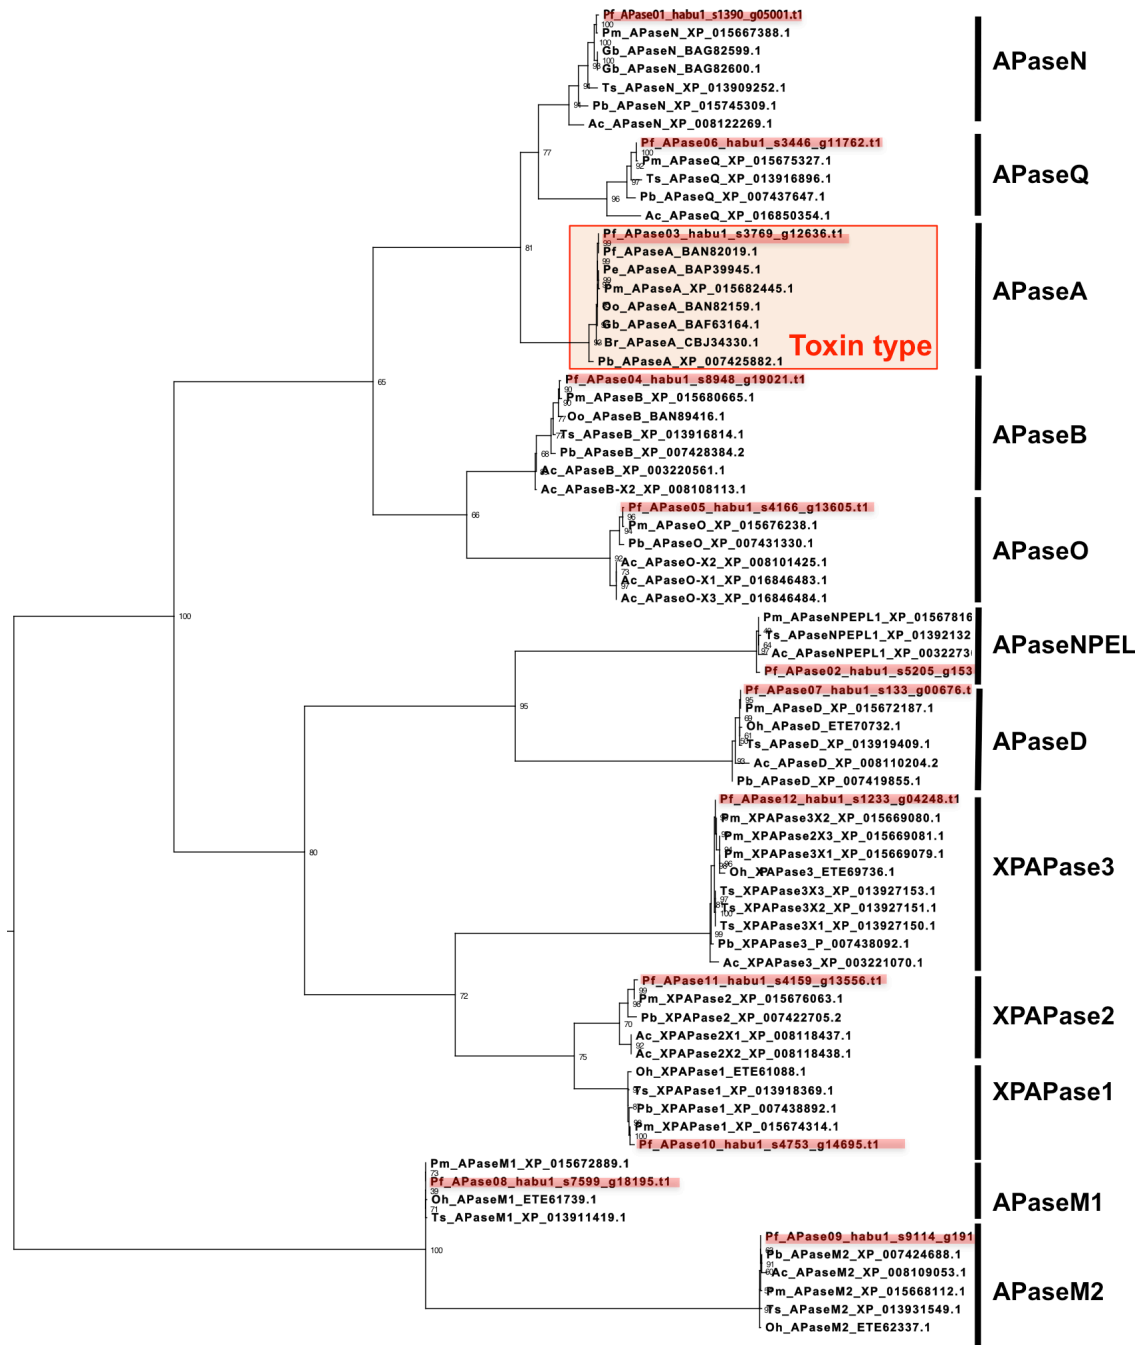





(c)

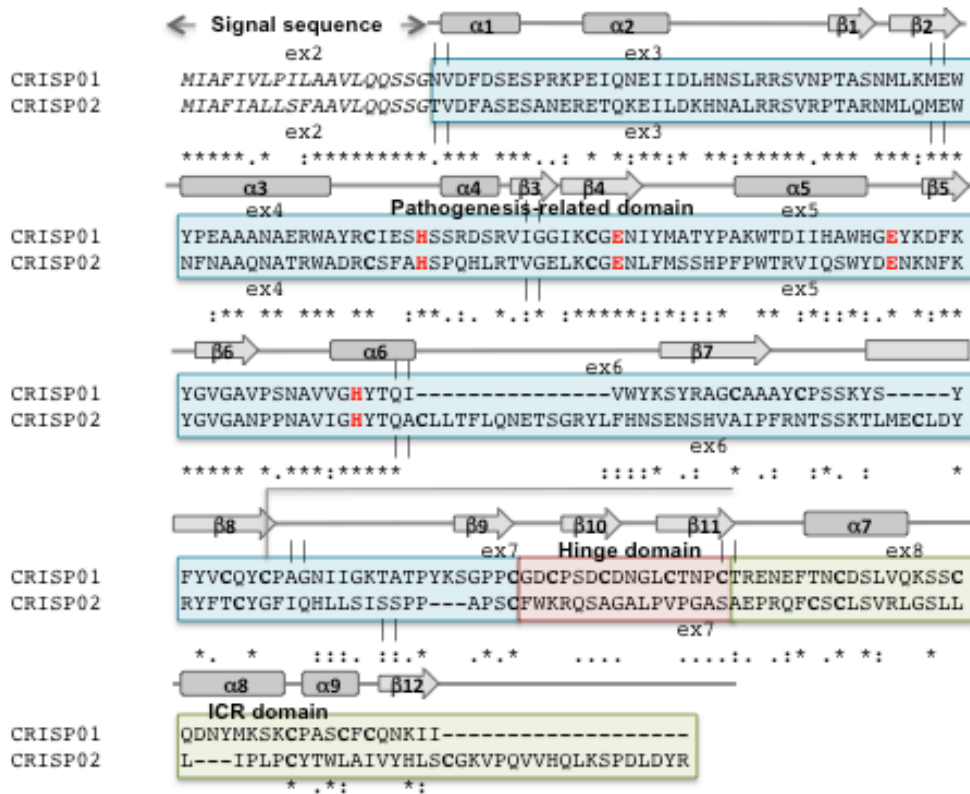

(d)

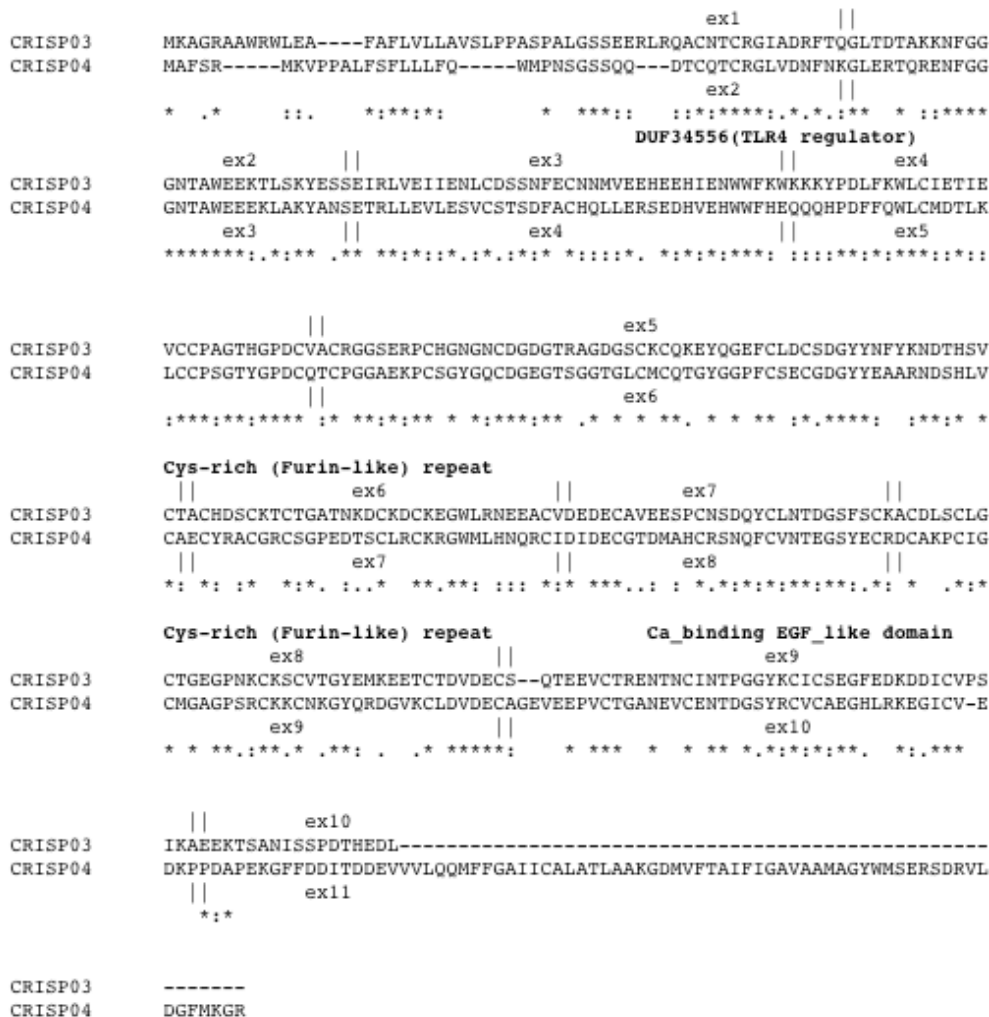

Supplementary Figure S15.

(a)

| Gene           | Name                                                           | Locus                                        | Gene model ID        | Transcripts             |
|----------------|----------------------------------------------------------------|----------------------------------------------|----------------------|-------------------------|
| Ves01 (svVesp) | Vespryn                                                        | habu1_scaffold402940 : 157656 ... 165646 : + | habu1_s402940_g24938 | habu1_s402940_g24938.t1 |
| Ves02          | butyrophilin subfamily                                         | habu1_scaffold402940 : 136268 ... 173215 : - | habu1_s402940_g24937 | habu1_s402940_g24937.t1 |
| Ves03          | spry domain-containing socs box protein 3 isoform x1           | habu1_scaffold2038 : 674725 ... 686992 : +   | habu1_s2038_g07466   | habu1_s2038_g07466.t1   |
| Ves04          | spry domain-containing protein                                 | habu1_scaffold1489 : 27447 ... 30825 : -     | habu1_s1489_g05514   | habu1_s1489_g05514.t1   |
| Ves05          | spry domain-containing socs box protein 4 isoform x1           | habu1_scaffold2998 : 118432 ... 298625 : -   | habu1_s2998_g10640   | habu1_s2998_g10640.t1   |
| Ves06          | F-box/SPRY domain-containing protein 1                         | habu1_scaffold12804 : 318189 ... 339575 : -  | habu1_s12804_g20892  | habu1_s12804_g20892.t1  |
| Ves07          | SPRY domain-containing protein 7                               | habu1_scaffold13689 : 124686 ... 130582 : +  | habu1_s13689_g21202  | habu1_s13689_g21202.t1  |
| Ves08          | SPRY domain-containing protein 3                               | habu1_scaffold1516 : 380747 ... 424339 : +   | habu1_s1516_g05661   | habu1_s1516_g05661.t1   |
| Ves09          | fibronectin type III and SPRY domain-containing protein 2-like | habu1_scaffold3496 : 592235 ... 607031 : +   | habu1_s3496_g11883   | habu1_s3496_g11883.t1   |
| Ves10          | spry domain-containing socs box protein 1                      | habu1_scaffold3776 : 8796 ... 59035 : +      | habu1_s3776_g12675   | habu1_s3776_g12675.t1   |
| Ves11          | fibronectin type iii and spry domain-containing protein 1      | habu1_scaffold2525 : 6768 ... 32830 : -      | habu1_s2525_g09169   | habu1_s2525_g09169.t1   |
| Ves12          | ring finger and spry domain-containing protein 1               | habu1_scaffold503 : 116026 ... 143018 : +    | habu1_s503_g02344    | habu1_s503_g02344.t1    |

(b)

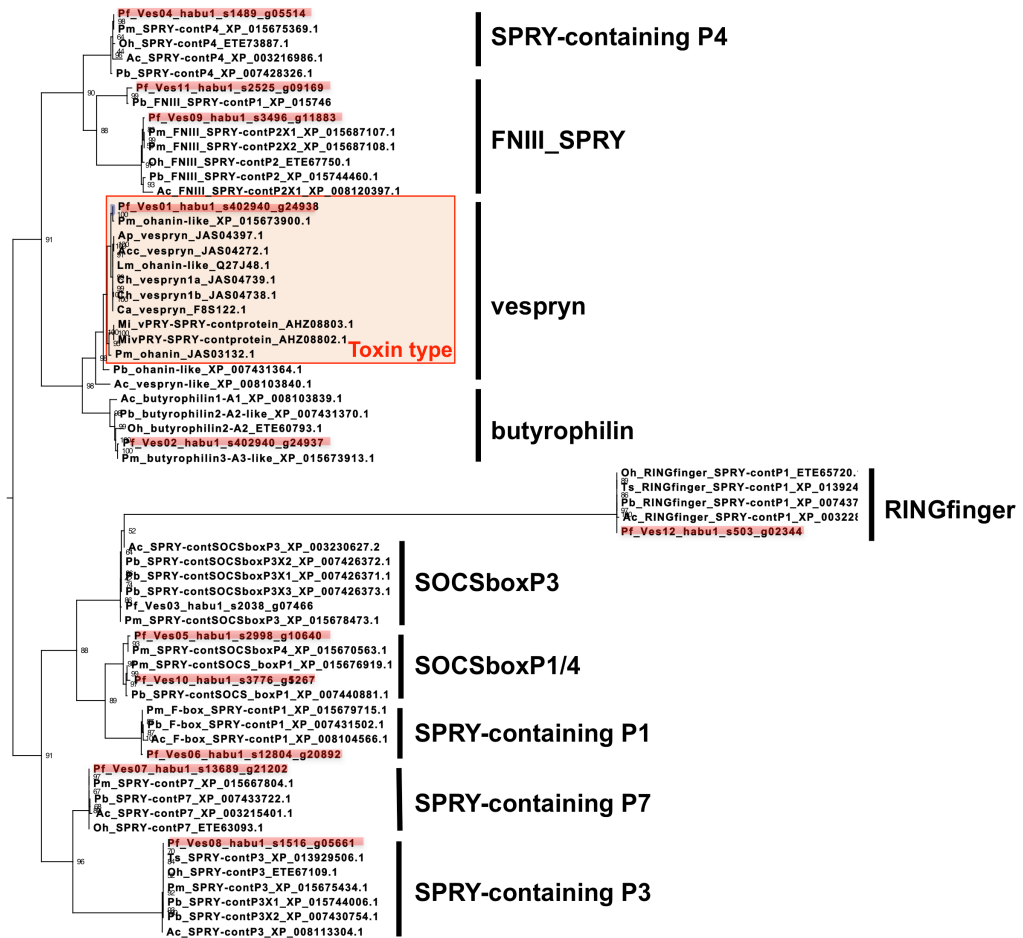

Supplementary Figure S16

(a)

| Gene              | Name                                            | Locus                                        | Gene Model ID      | Transcripts                  |
|-------------------|-------------------------------------------------|----------------------------------------------|--------------------|------------------------------|
| 5Nase01 (sv5Nase) | sv5Nase                                         | habu1_scaffold6028 : 169856 ... 203427 : +   | habu1_s6028_g16570 | pb016481_c551957_f58p63_2527 |
| 5Nase02 (nv5Nase) | 5-nucleotidase domain-containing protein 2-like | habu1_scaffold1426 : 2901530 ... 2936315 : + | habu1_s1426_g05181 | habu1_s1426_g05181.t1        |
| 5Nase03 (nv5Nase) | 5-nucleotidase domain-containing protein 2      | habu1_scaffold6846 : 55556 ... 83885 : +     | habu1_s6846_g17547 | habu1_s6846_g17547.t1        |
| 5Nase04 (nv5Nase) | 5-nucleotidase domain-containing protein 3      | habu1_scaffold428 : 301964 ... 331735 : -    | habu1_s428_g02066  | habu1_s428_g02066.t1         |
| 5Nase05 (nv5Nase) | cytosolic purine 5-nucleotidase isoform         | habu1_scaffold1344 : 510687 ... 545803 : -   | habu1_s1344_g04804 | habu1_s1344_g04804.t1        |
| 5Nase06 (nv5Nase) | 5_nucleotid                                     | habu1_scaffold1548 : 105056 ... 126204 : +   | habu1_s1548_g05833 | habu1_s1548_g05833.t1        |
| 5Nase07 (nv5Nase) | 5_nucleotid                                     | habu1_scaffold8872 : 26926 ... 110043 : +    | habu1_s8872_g18961 | habu1_s8872_g18961.t1        |
| 5Nase08 (nv5Nase) | 5 (3-) cytosolic type                           | habu1_scaffold3440 : 270746 ... 276672 : +   | habu1_s3440_g11638 | habu1_s3440_g11638.t1        |
| 5Nase09 (nv5Nase) | 3 (2-) -bisphosphate nucleotidase               | habu1_scaffold304 : 182426 ... 196985 : -    | habu1_s304_g01433  | habu1_s304_g01433.t1         |
| 5Nase10 (nv5Nase) | cytosolic 5-nucleotidase                        | habu1_scaffold18 : 2268164 ... 2279432 : -   | habu1_s18_g00174   | habu1_s18_g00174.t1          |
| 5Nase11 (nv5Nase) | cytosolic 5-nucleotidase 1b                     | habu1_scaffold2849 : 462558 ... 469949 : +   | habu1_s2849_g10145 | habu1_s2849_g10145.t1        |

(b)

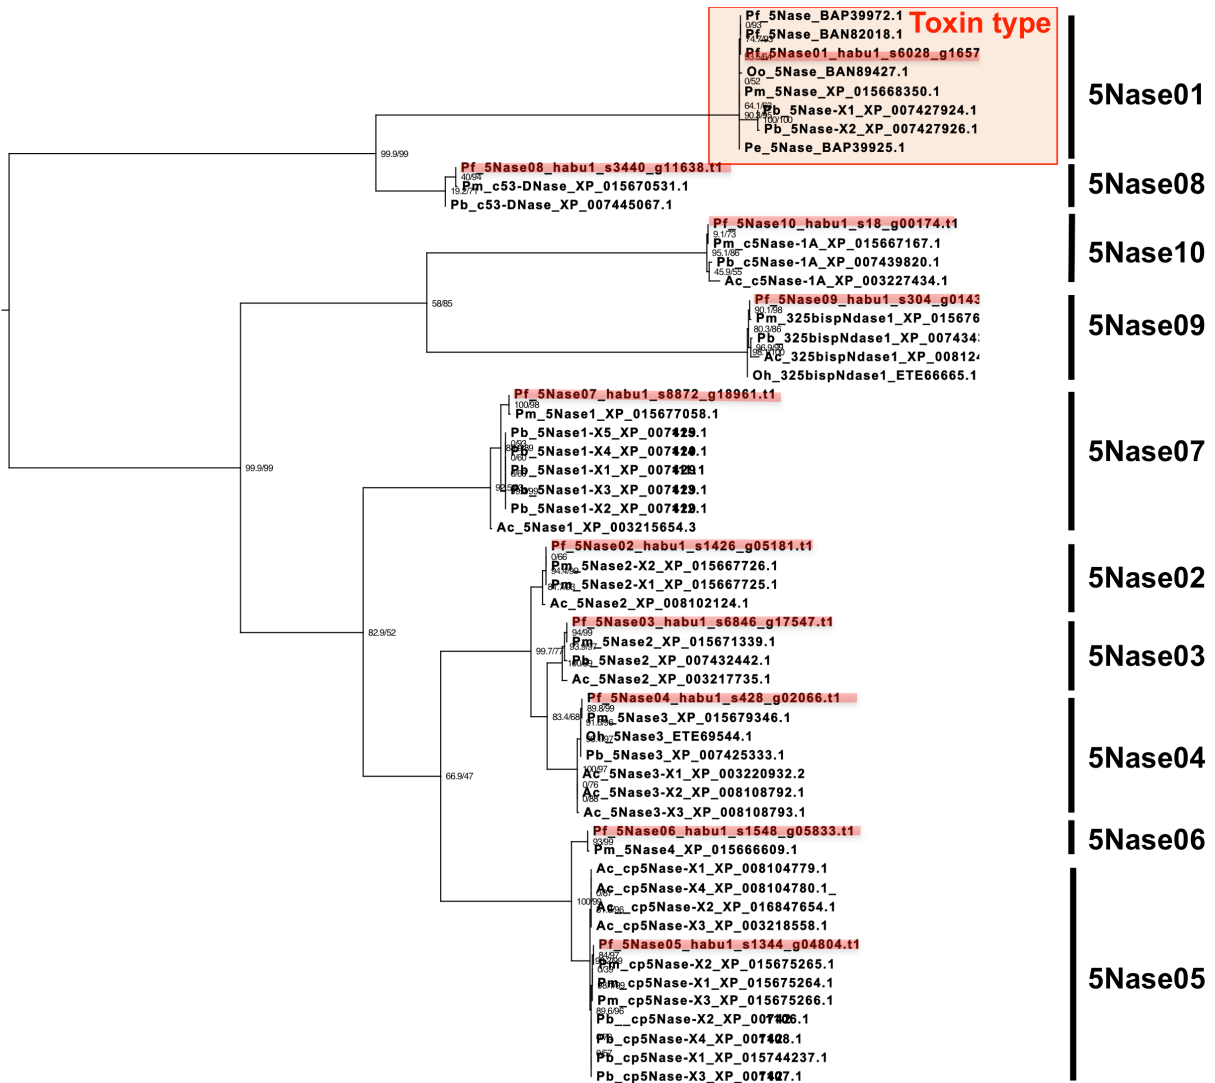

Supplementary Figure S17.

(a)

| Gene          | Name     | Locus                                        | Gene Model ID       | Transcripts                |
|---------------|----------|----------------------------------------------|---------------------|----------------------------|
| DPP01 (nvDPP) | DPP-I    | habu1_scaffold1219 : 174906 ... 207609 : +   | habu1_s1219_g04195  | habu1_s1219_g04195.t1      |
| DPP02 (nvDPP) | DPP-II   | habu1_scaffold998 : 329636 ... 331823 : +    | habu1_s998_g03532   | habu1_s998_g03532.t1       |
| DPP03 (nvDPP) | DPP-II   | habu1_scaffold998 : 322306 ... 326986 : +    | habu1_s998_g03530   | habu1_s998_g03530.t1       |
| DPP04 (nvDPP) | DPP-III  | habu1_scaffold7877 : 9596 ... 37295 : +      | habu1_s7877_g18328  | habu1_s7877_g18328.t1      |
| DPP05 (svDPP) | svDPP-IV | habu1_scaffold1020 : 1996805 ... 2061742 : + | habu1_s1020_g03622  | pb016480_c171896_f1p3_4438 |
| DPP06 (nvDPP) | DPP-VIII | habu1_scaffold1390 : 679600 ... 693217 : -   | habu1_s1390_g04966  | habu1_s1390_g04966.t1      |
| DPP07 (nvDPP) | DPP-IX   | habu1_scaffold5905 : 38286 ... 91928 : +     | habu1_s5905_g16391  | habu1_s5905_g16391.t1      |
| DPP08 (nvDPP) | DPP-X    | habu1_scaffold13003 : 203276 ... 412685 : -  | habu1_s13003_g20945 | habu1_s13003_g20945.t1     |

(b)

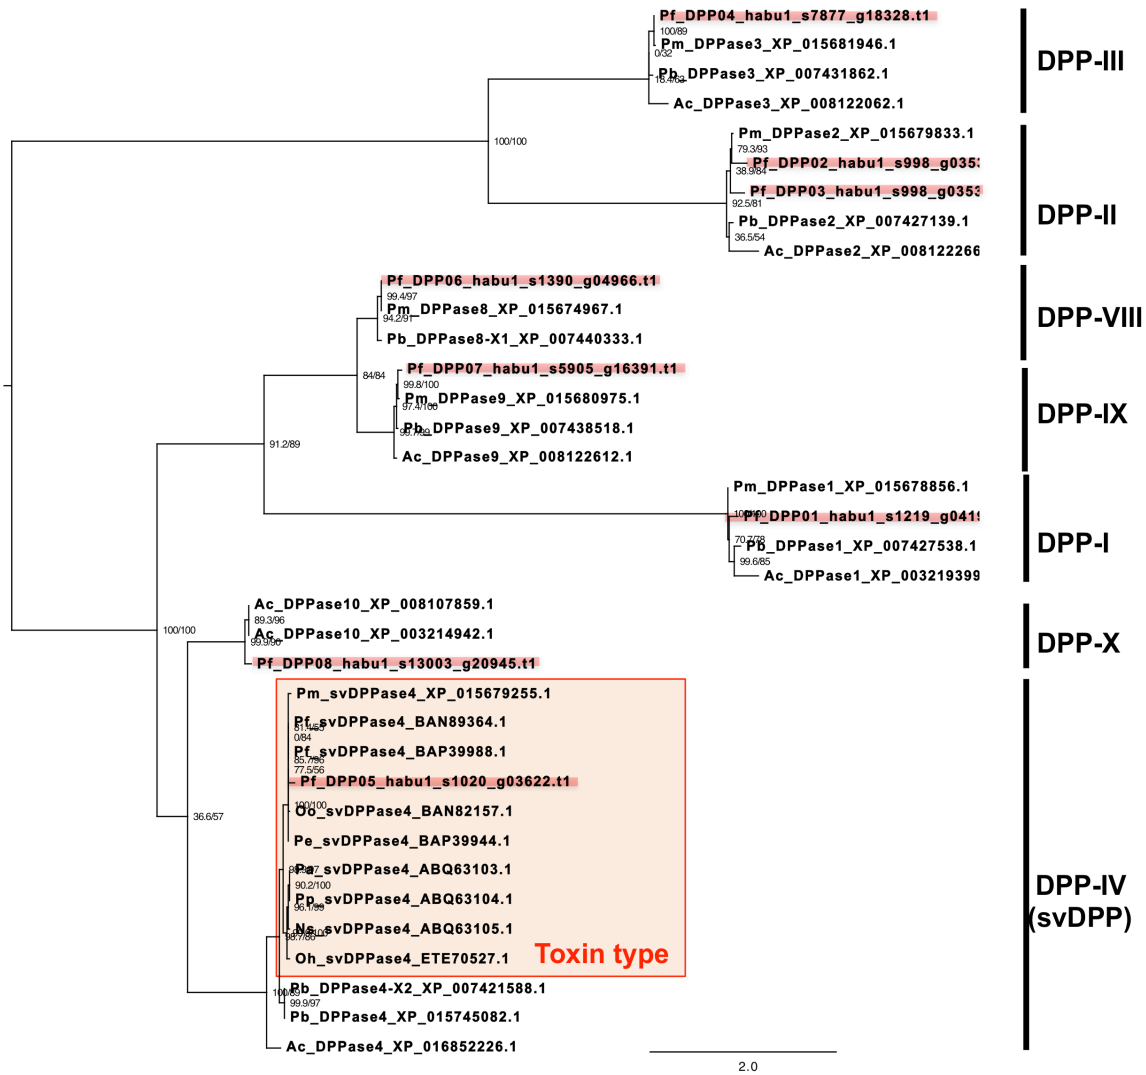

Supplementary Figure S18

(a)

| Gene     | Name             | Locus                                      | Gene model ID      | Transcripts                 |
|----------|------------------|--------------------------------------------|--------------------|-----------------------------|
| svVEGF01 | svVEGF(svVEGF_F) | habu1_scaffold565 : 505831 ... 554056 : -  | habu1_s565_g02679  | pb016481_c76319_f71p22_1316 |
| nvVEGF01 | VEGF-A           | habu1_scaffold6836 : 129006 ... 390238 : + | habu1_s6836_g17529 | habu1_s6836_g17529.t1       |
| nvVEGF02 | VEGF-C           | habu1_scaffold9381 : 115236 ... 156444 : + | habu1_s9381_g19343 | habu1_s9381_g19343.t1       |

(b)

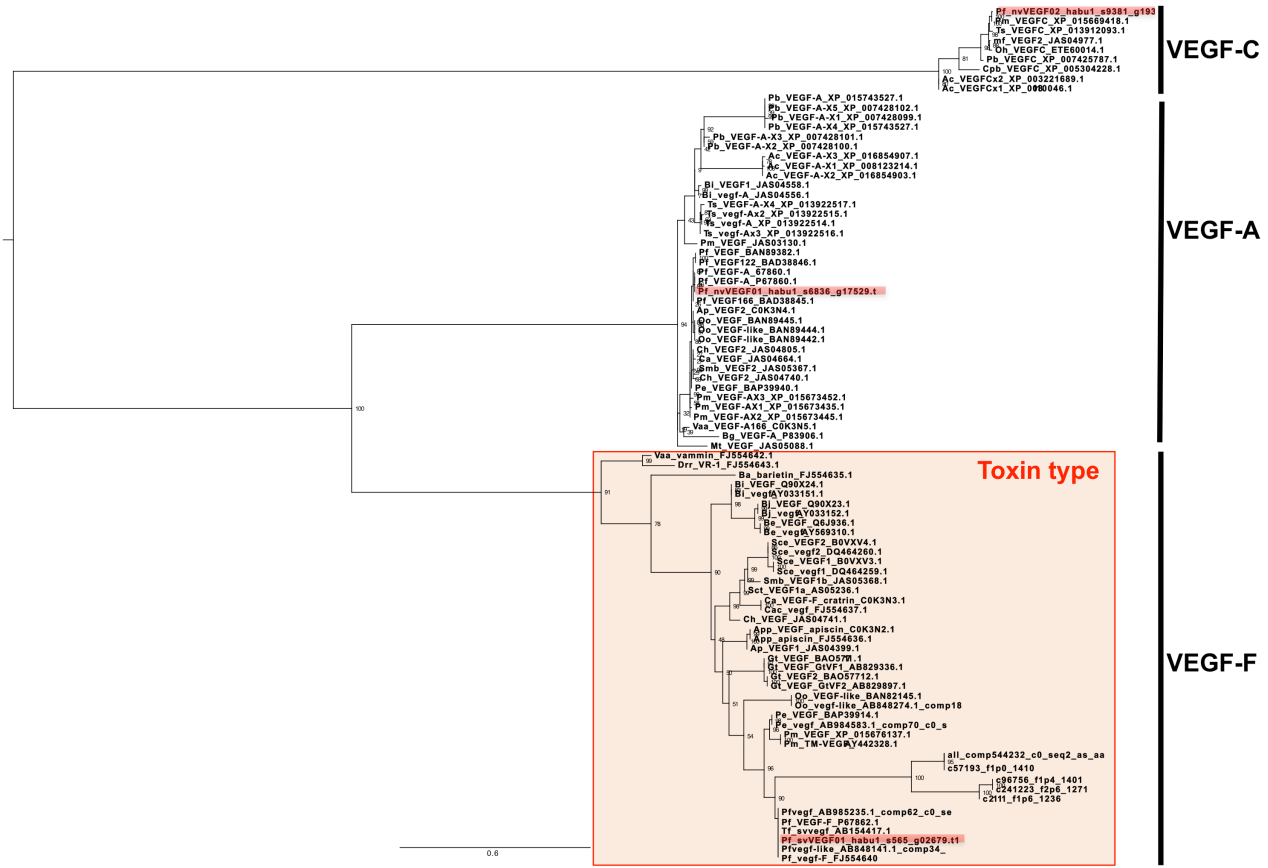

Supplementary Figure S19

(a)

| Gene   | Name               | Locus                                       | Gene Model ID/Annotation Link | Transcripts                  |
|--------|--------------------|---------------------------------------------|-------------------------------|------------------------------|
| PDE_01 | PDE_01(svPDE)      | habu1_scaffold149 : 1524169 ... 1594790 : + | habu1_s149_g00804             | pb016481_c221783_f35p18_2633 |
| PDE_02 | PDE_02(nvPDE)      | habu1_scaffold149 : 1600729 ... 1649852 : + | habu1_s149_g00805             | habu1_s149_g00805.t1         |
| PDE_03 | PDE_03(nvPDE/cAMP) | habu1_scaffold149 : 3362511 ... 3486620 : + | habu1_s149_g00834             | habu1_s149_g00834.t1         |

(b)

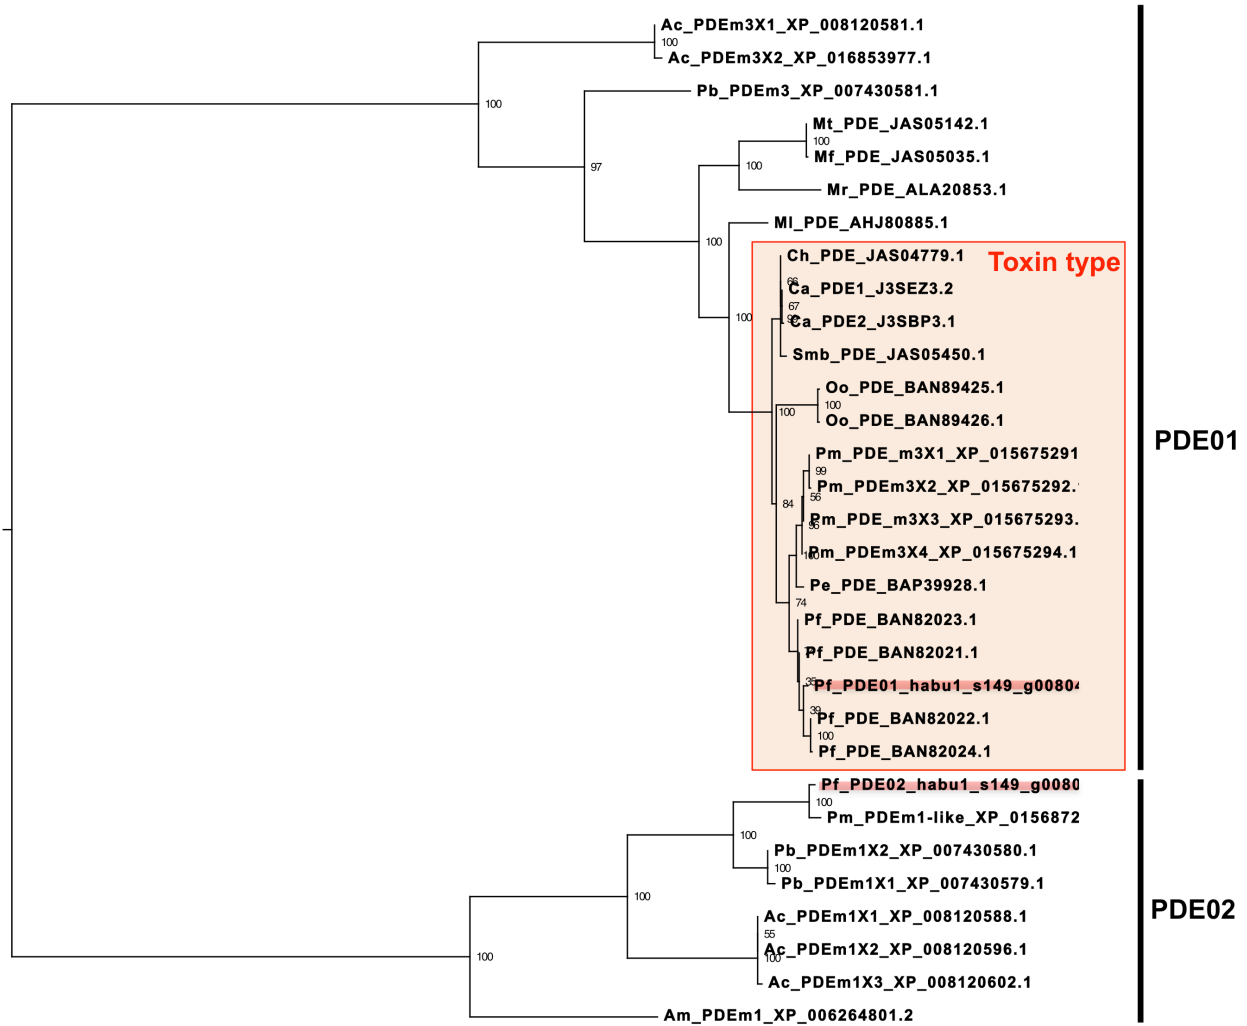

**Supplementary Figure S20**

**(a)**

| Gene          | Name                                  | Locus                                        | Gene Model ID      | Transcripts              |
|---------------|---------------------------------------|----------------------------------------------|--------------------|--------------------------|
| PLB01 (svPLB) | phospholipase b                       | habu1_scaffold1233 : 1498267 ... 1531920 : + | habu1_s1233_g04284 | pb016481_c662_f13p9_1819 |
| PLB02         | phospholipase b-like 2                | habu1_scaffold1964 : 35979 ... 45965 : -     | habu1_s1964_g07200 | habu1_s1964_g07200.t1    |
| PLB03         | phospholipase b1(membrane-associated) | habu1_scaffold313 : 1861453 ... 1973632 : -  | habu1_s313_g01520  | habu1_s313_g01520.t1     |
| PLB04         | 60 kDa lysophospholipase              | habu1_scaffold3352 : 459066 ... 534431 : -   | habu1_s3352_g11424 | habu1_s3352_g11424.t1    |
| PLB05         | lysophospholipase-like                | habu1_scaffold303 : 156916 ... 176572 : +    | habu1_s303_g01427  | habu1_s303_g01427.t1     |

**(b)**

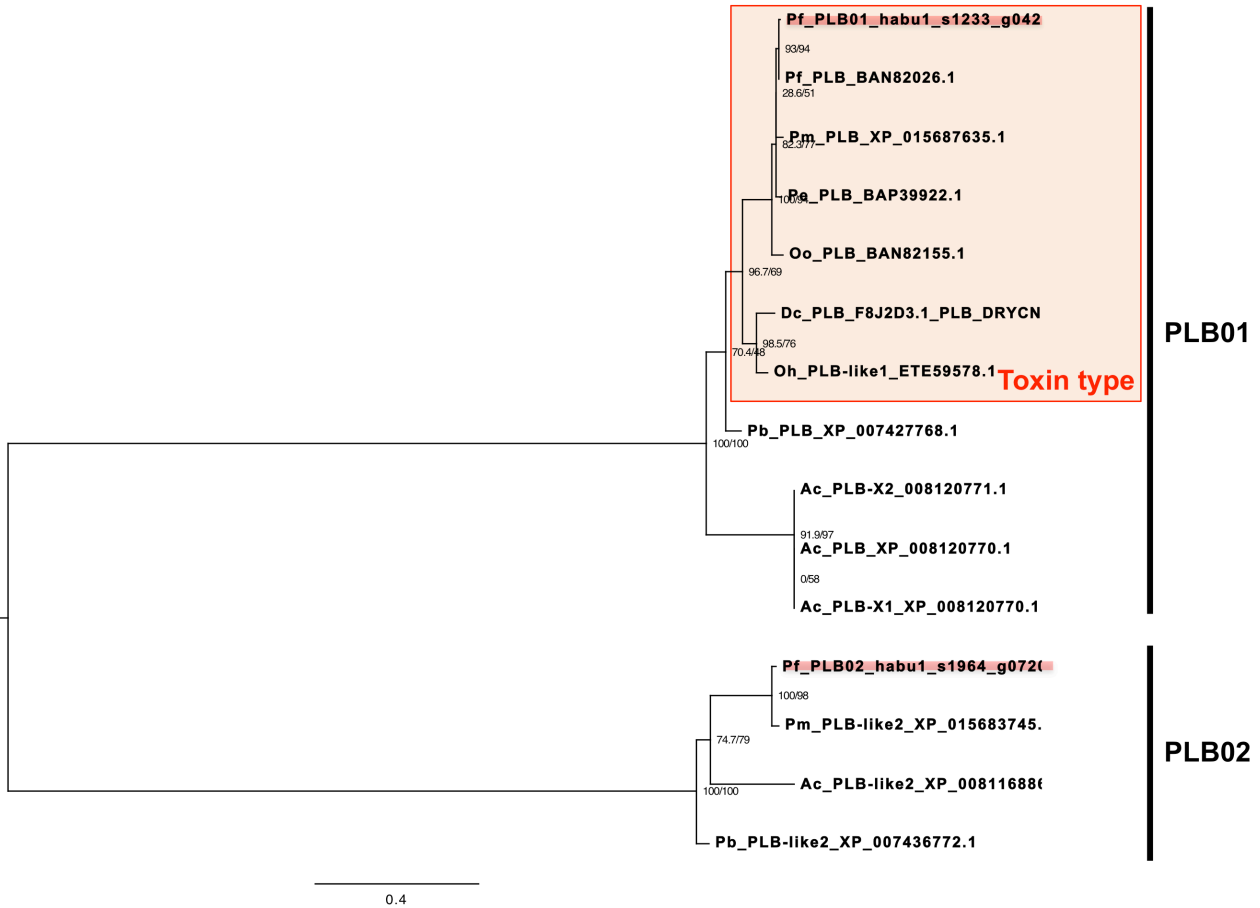



Supplementary Figure S21

(a)

| Gene  | Name                               | Locus                                  | Gene model ID        | Transcripts             |
|-------|------------------------------------|----------------------------------------|----------------------|-------------------------|
| CNP01 | BPP_CNP (svCNP)                    | habu1_scaffold258676: 1...337: -       | habu1_s258676_g24318 | habu1_s258676_g24318.t1 |
| CNP02 | B-type natriuretic peptides A-like | habu1_scaffold20540: 7387 ... 10895: - | habu1_s20540_g22311  | habu1_s20540_g22311.t1  |

(b)

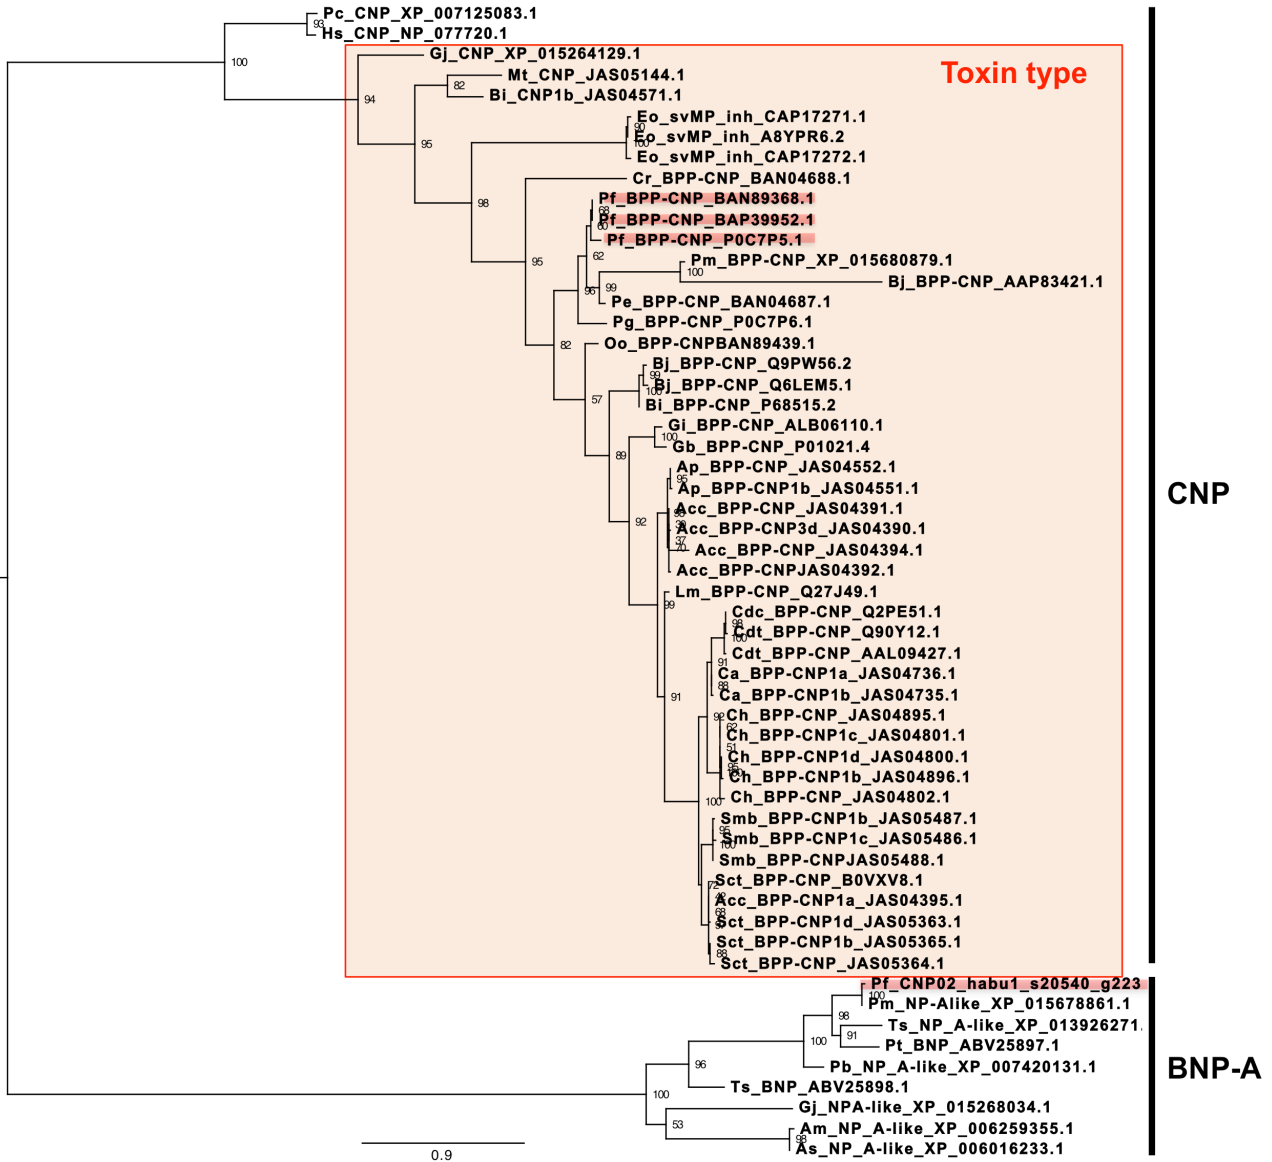

Supplementary Figure S22.

(a)

| Gene                | Name                                | Locus                                     | Gene model ID      | Transcripts                |
|---------------------|-------------------------------------|-------------------------------------------|--------------------|----------------------------|
| GPCase01 (svGPCase) | glutaminy-peptide cyclotransferases | habu1_scaffold510 : 291600 ... 305425 : - | habu1_s510_g02384  | pb016481_c398311_f1p1_2071 |
| GPCase02 (nvGPCase) | glutaminy-peptide cyclotransferases | habu1_scaffold3067 : 69888 ... 75755 : -  | habu1_s3067_g10859 | habu1_s3067_g10859.t1      |

(b)

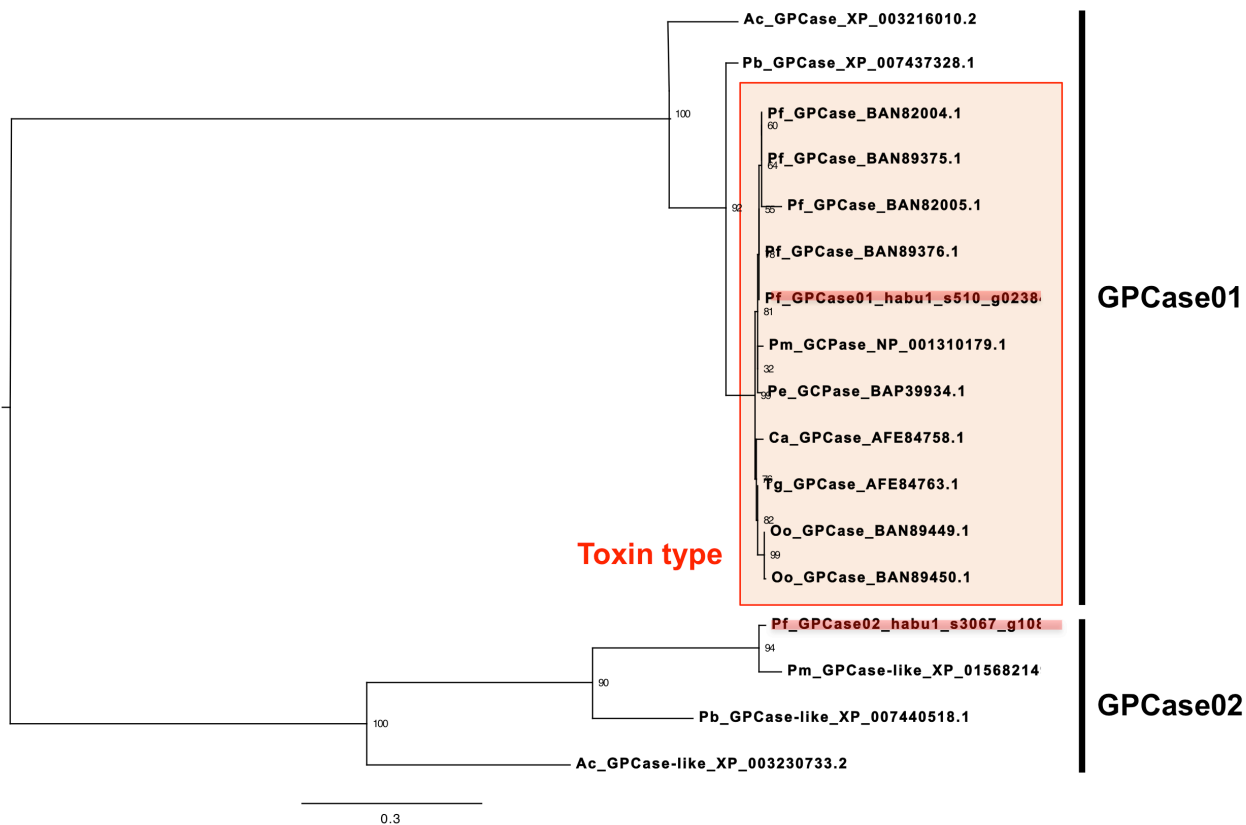

Supplement: 41598_2018_28749_MOESM1_ESM.pdf [file 41598_2018_28749_MOESM1_ESM.pdf]
